# Supplementary material for: Organogenetic transcriptomes of the Drosophila embryo at single cell resolution
Source: PubMed Central journal article supplement (PMC10820837; doi:10.1242/dev.202097), 2024-01-19
Supplement: develop-151-202097-s1.pdf [file develop-151-202097-s1.pdf]

**A** Biological replicates (Stage 10 – 12)

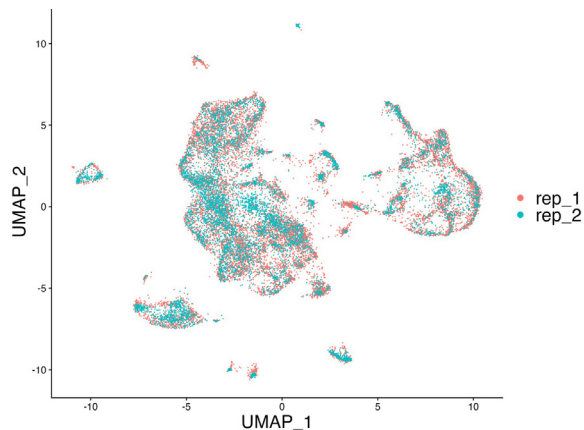

**B** Seurat clusters (Stage 10 – 12)

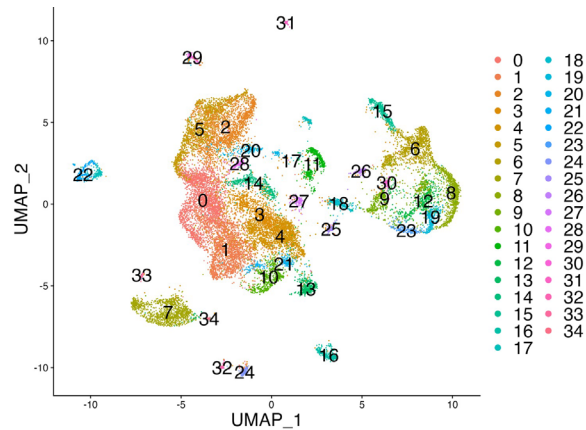

**C** Biological replicates (Stage 13 – 16)

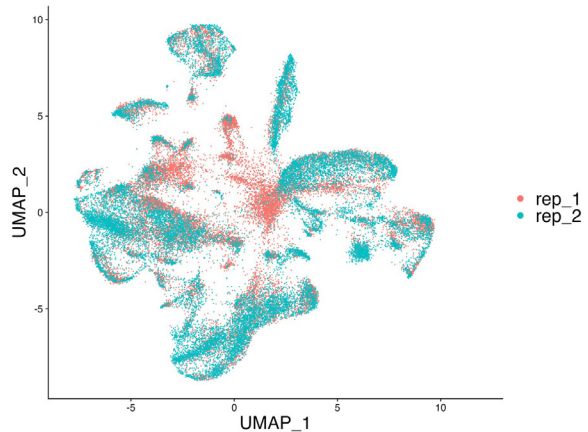

**D** Seurat clusters (Stage 13 – 16)

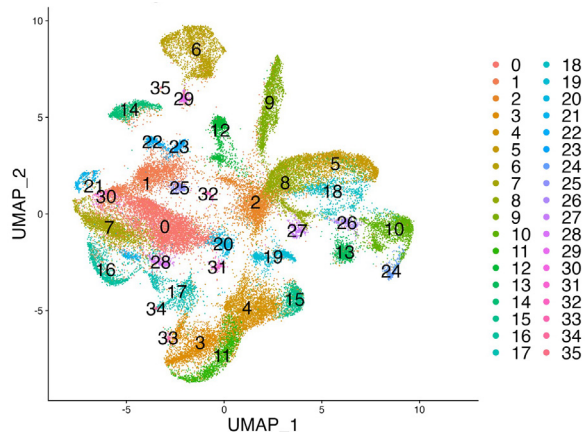

**E** Cluster groupings (Stage 10 – 12)

| Stage 10 - 12 Cell Clusters - Assignments           | Stage 10 - 12 Grouped Cell Types      |
|-----------------------------------------------------|---------------------------------------|
| Cluster 0 -- Epidermis 1                            | Epidermis                             |
| Cluster 1 -- Epidermis 2                            | Epidermis                             |
| Cluster 3 -- Epidermis 3                            | Epidermis                             |
| Cluster 4 -- Epidermis 4                            | Epidermis                             |
| Cluster 2 -- CNS 1                                  | CNS                                   |
| Cluster 5 -- CNS 2                                  | CNS                                   |
| Cluster 6 -- Somatic muscle 1                       | Somatic muscle                        |
| Cluster 8 -- Somatic muscle 2                       | Somatic muscle                        |
| Cluster 12 -- Somatic muscle 3                      | Somatic muscle                        |
| Cluster 19 -- Somatic muscle 4                      | Somatic muscle                        |
| Cluster 23 -- Somatic muscles 5                     | Somatic muscle                        |
| Cluster 17 -- Plasmotocytes 1                       | Plasmotocytes                         |
| Cluster 22 -- Plasmotocytes 2                       | Plasmotocytes                         |
| Cluster 24 -- Germ cells 1                          | Germ cells                            |
| Cluster 32 -- Germ cells 2                          | Germ cells                            |
| Cluster 20 -- Glia                                  | Glia                                  |
| Cluster 14 -- Sensory neurons                       | Sensory neurons                       |
| Cluster 7 -- Gut endoderm                           | Gut endoderm                          |
| Cluster 9 -- Circular visceral mesoderm             | Circular visceral mesoderm            |
| Cluster 10 -- Trachea                               | Trachea                               |
| Cluster 11 -- Yolk                                  | Yolk                                  |
| Cluster 13 -- Anterior and posterior gut primordium | Anterior and posterior gut primordium |
| Cluster 15 -- Fat Body                              | Fat Body                              |
| Cluster 16 -- Amnioserosa                           | Amnioserosa                           |
| Cluster 18 -- Pharyngeal muscle                     | Pharyngeal muscle                     |
| Cluster 21 -- Hindgut                               | Hindgut                               |
| Cluster 25 -- Apodemes                              | Apodemes                              |
| Cluster 26 -- Longitudinal visceral mesoderm        | Longitudinal visceral mesoderm        |
| Cluster 27 -- Salivary gland                        | Salivary gland                        |
| Cluster 28 -- Midline Glia                          | Midline Glia                          |
| Cluster 29 -- Unknown (CNS?)                        | Unknown (CNS?)                        |
| Cluster 30 -- Hindgut muscle                        | Hindgut muscle                        |
| Cluster 31 -- Crystal cells                         | Crystal cells                         |
| Cluster 33 -- Malpighian tubules                    | Malpighian tubules                    |
| Cluster 34 -- Posterior midgut primordium           | Posterior midgut primordium           |

**F** Cluster groupings (Stage 13 - 16)

| Stage 13 - 16 Cell Clusters - Assignments    | Stage 13 - 16 Grouped Cell Types |
|----------------------------------------------|----------------------------------|
| Cluster 0 -- Dorsal epidermis                | Epidermis                        |
| Cluster 1 -- Ventral epidermis               | Epidermis                        |
| Cluster 3 -- CNS 1                           | CNS                              |
| Cluster 4 -- CNS 2                           | CNS                              |
| Cluster 11 -- CNS 3                          | CNS                              |
| Cluster 15 -- CNS 4                          | CNS                              |
| Cluster 33 -- CNS 5                          | CNS                              |
| Cluster 5 -- Somatic muscle 1                | Somatic muscle                   |
| Cluster 8 -- Somatic muscle 2                | Somatic muscle                   |
| Cluster 18 -- Somatic muscle 3               | Somatic muscle                   |
| Cluster 14 -- Plasmotocytes                  | Plasmotocytes                    |
| Cluster 12 -- Germ cells                     | Germ cells                       |
| Cluster 19 -- Glia 1                         | Glia                             |
| Cluster 31 -- Glia 2                         | Glia                             |
| Cluster 17 -- Head sensory neurons           | Sensory neurons                  |
| Cluster 34 -- Lateral sensory neurons        | Sensory neurons                  |
| Cluster 2 -- Unknown                         | Unknown                          |
| Cluster 6 -- Gut endoderm                    | Gut endoderm                     |
| Cluster 7 -- Hypopharynx                     | Hypopharynx                      |
| Cluster 9 -- Fat body                        | Fat body                         |
| Cluster 10 -- Circular visceral mesoderm     | Circular visceral mesoderm       |
| Cluster 13 -- Pharyngeal muscle              | Pharyngeal muscle                |
| Cluster 16 -- Trachea                        | Trachea                          |
| Cluster 20 -- Optic lobe                     | Optic lobe                       |
| Cluster 21 -- Hindgut                        | Hindgut                          |
| Cluster 22 -- Yolk                           | Yolk                             |
| Cluster 23 -- Amnioserosa                    | amnioserosa                      |
| Cluster 24 -- Longitudinal visceral mesoderm | Longitudinal visceral mesoderm   |
| Cluster 25 -- Salivary gland                 | Salivary gland                   |
| Cluster 26 -- Hindgut muscle                 | Hindgut muscle                   |
| Cluster 27 -- Dorsal vessel                  | Dorsal vessel                    |
| Cluster 28 -- Epipharynx                     | Epipharynx                       |
| Cluster 29 -- Malpighian tubules             | Malpighian tubules               |
| Cluster 30 -- Esophagus                      | Esophagus                        |
| Cluster 32 -- Oenocytes                      | Oenocytes                        |
| Cluster 35 -- Garland cells                  | Garland cells                    |

**Fig. S1.** UMAPs showing the (A) batch information and (B) Seurat clusters for stage 10-12 embryos. UMAPs showing the (C) batch information and (D) Seurat clusters for stage 13-16 embryos. Tables that map Seurat clusters to cell types for (E) stage 10-12 embryos and (F) stage 13-16 embryos.

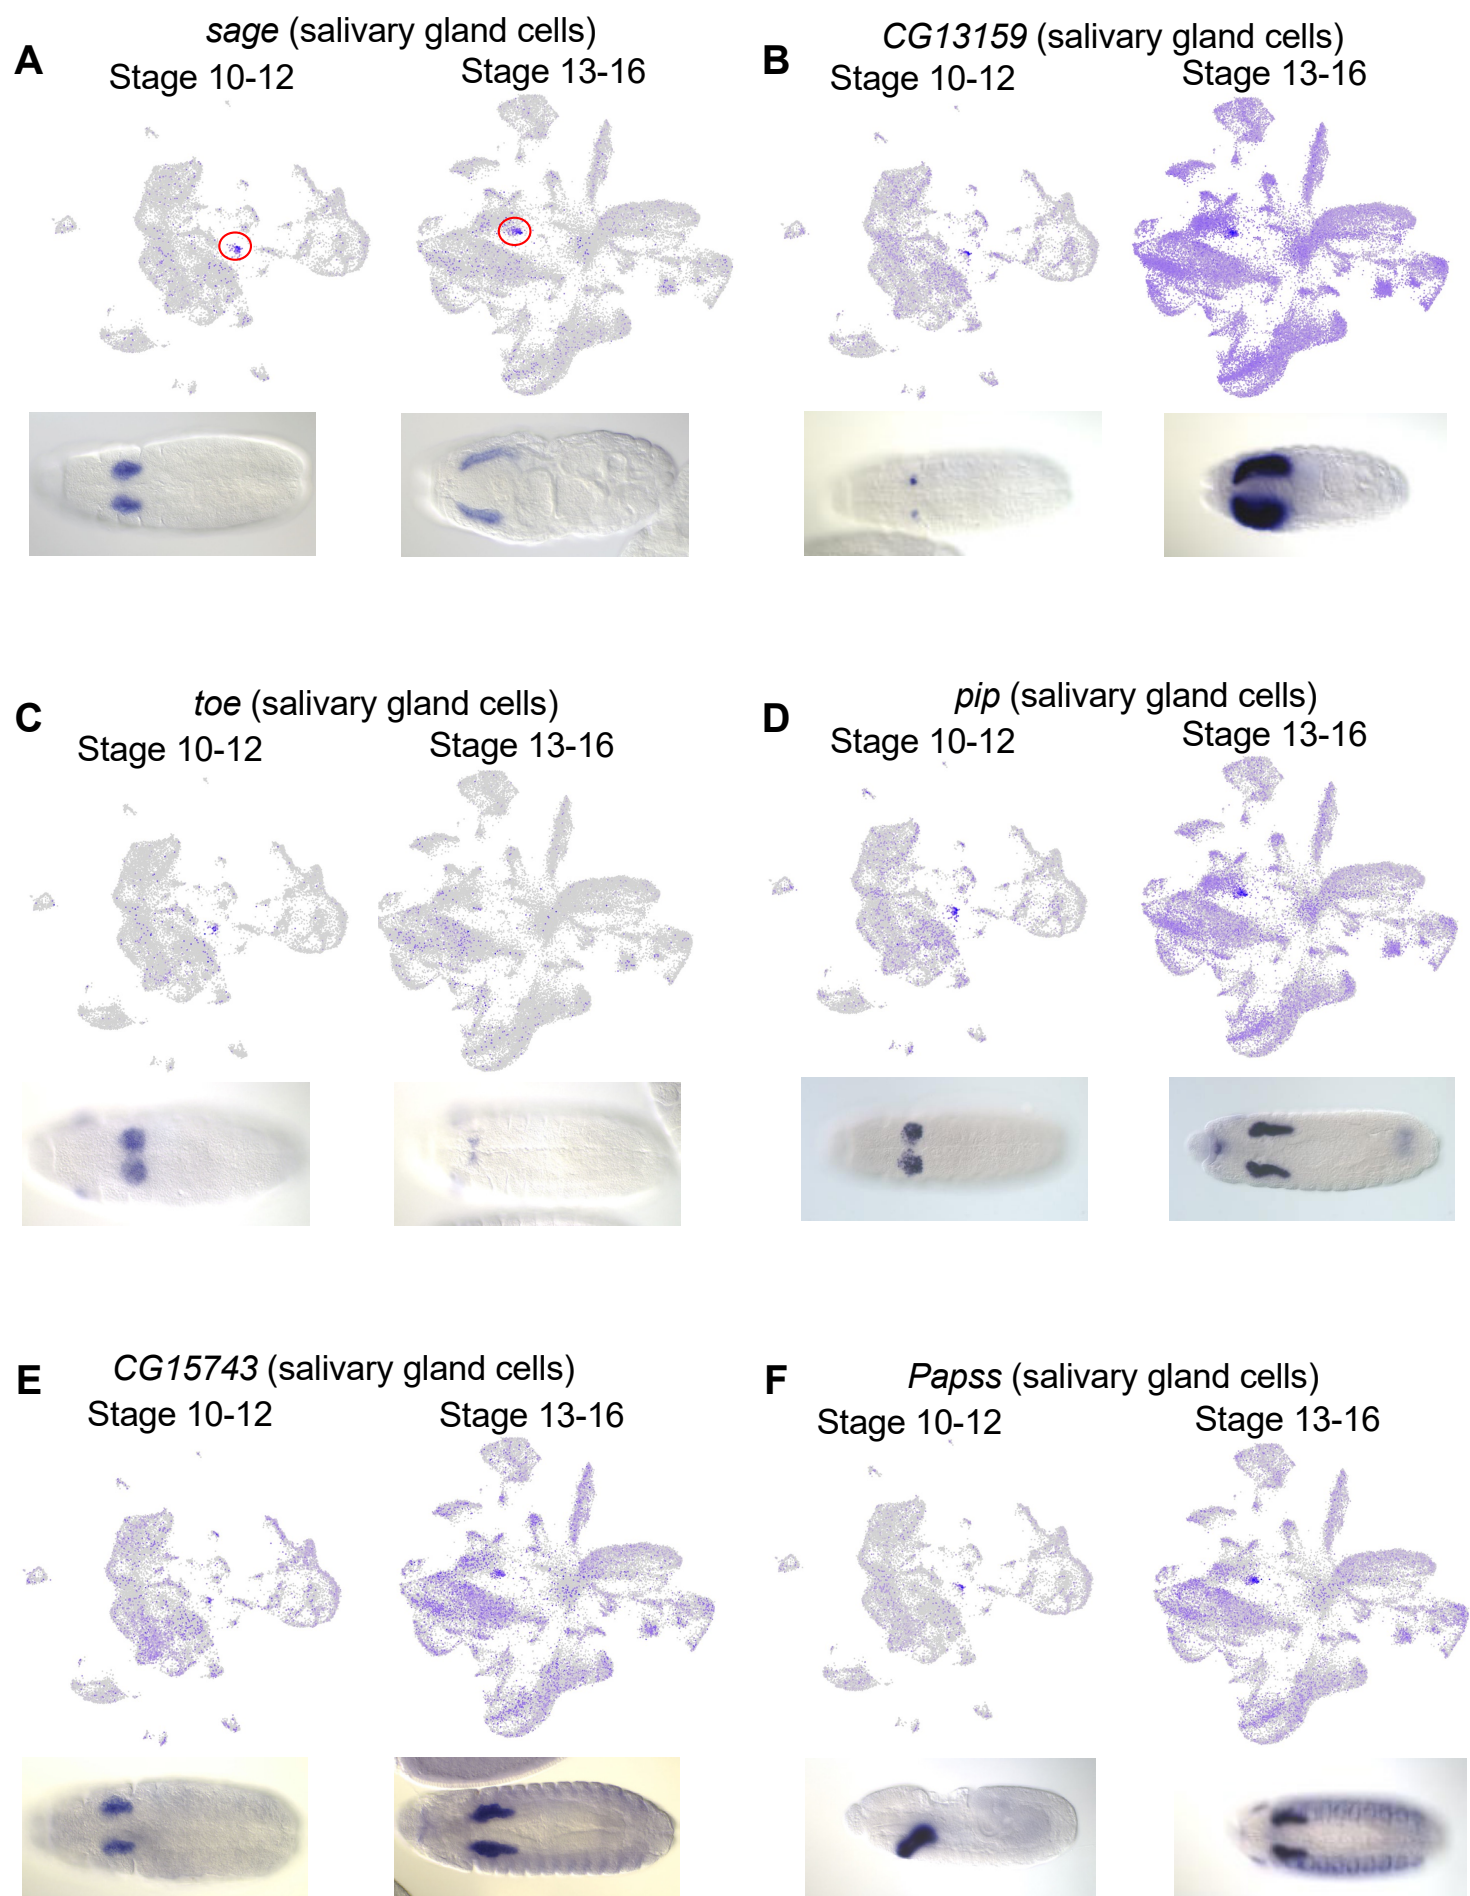

**Fig. S2.** UMAPs with six salivary gland marker genes' expression ((A) *sage*, (B) *CG13159*, (C) *toe*, (D) *pip*, (E) *CG15743* and (F) *Papss*) overlaid in both stage 10-12 and stage 13-16 embryos. Underneath the UMAPs are in situ from BDGP of the six salivary gland marker genes in stage 10-12 and stage 13-16 embryos. The red circles indicate the approximate UMAP locations of salivary gland cells for stage 10-12 and stage 13-16 embryos.



**A** Salivary gland cells by batch and stage

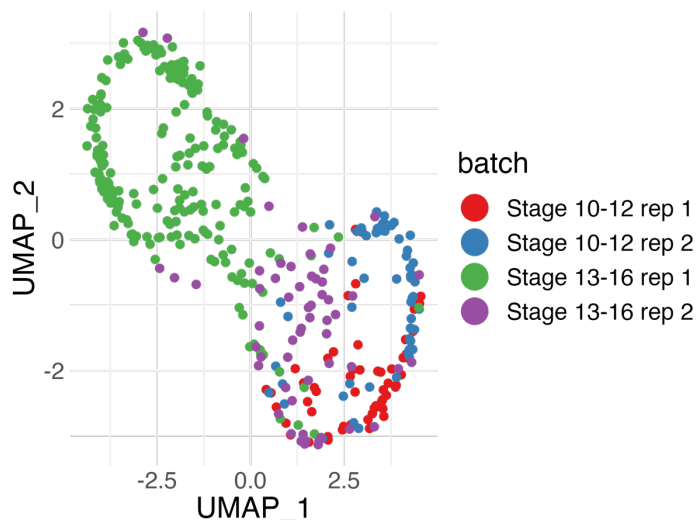

**B** Salivary gland cells by batch and pseudotime

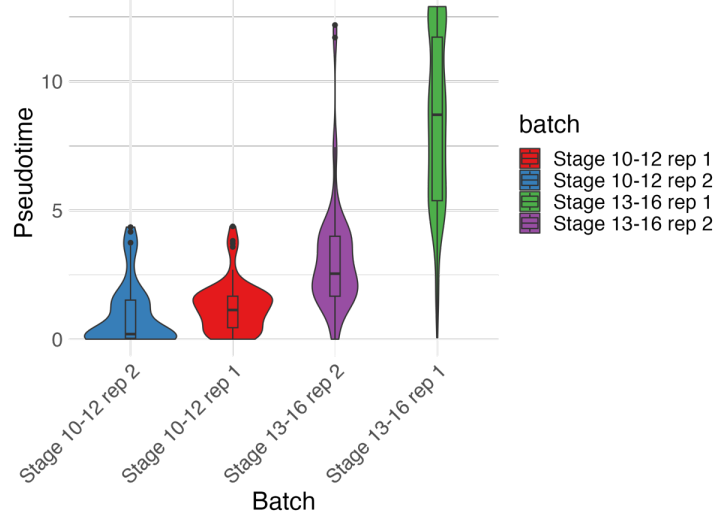

**C** Golgi Vesicle Transport Genes

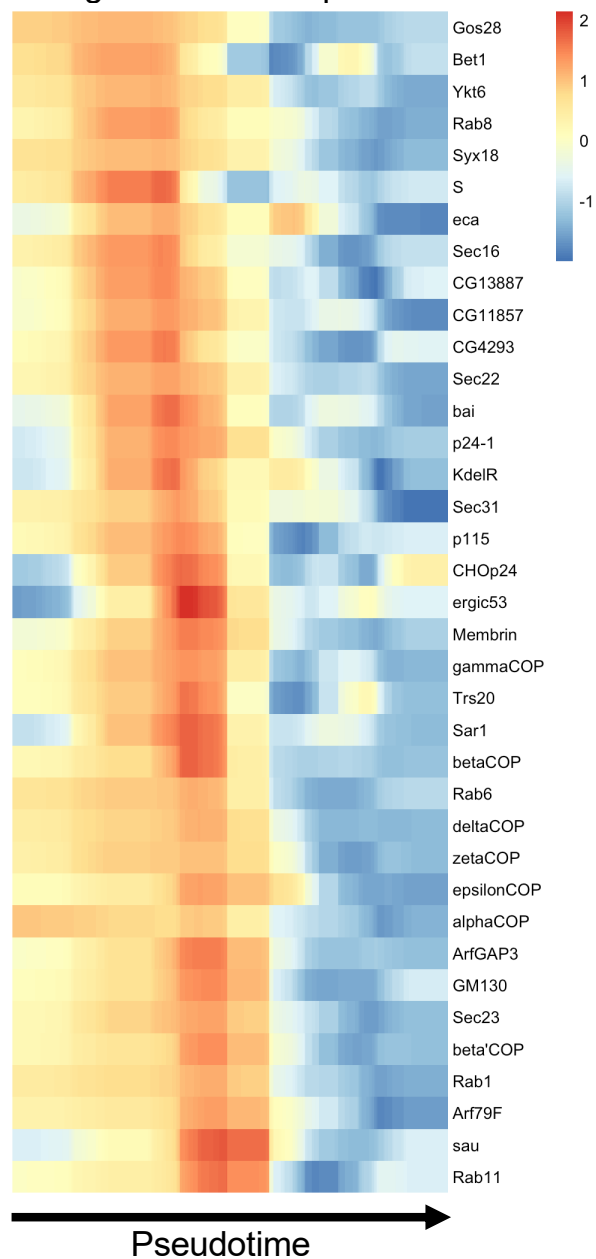

**D** Cytoplasmic Translation Genes

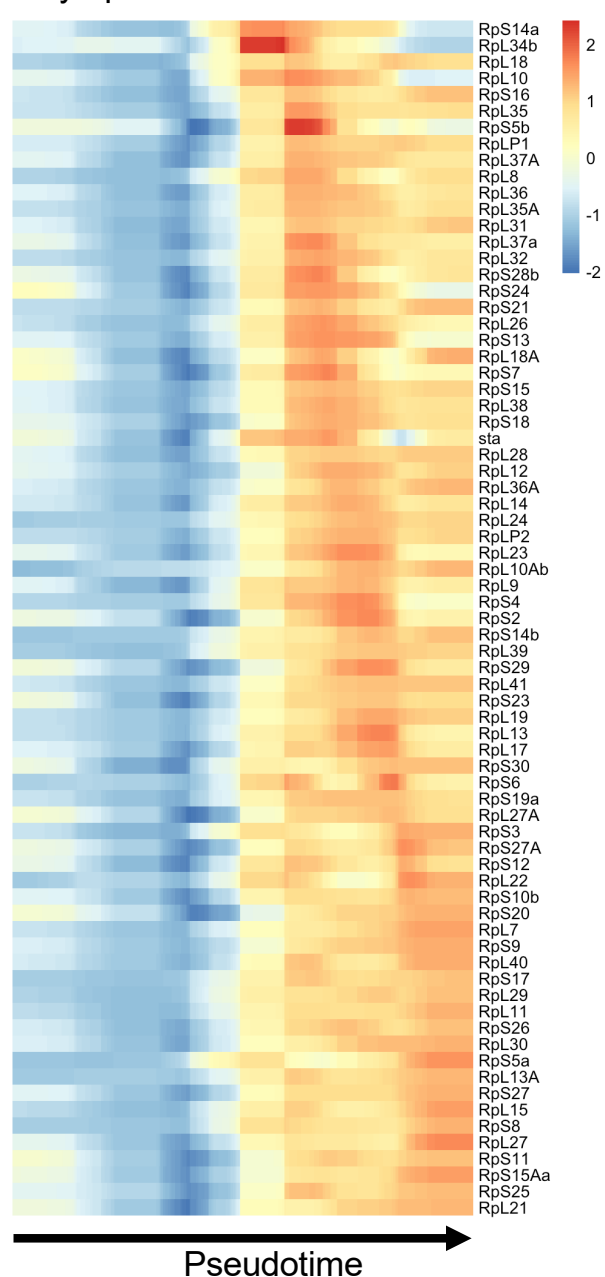

**Fig. S3.** (A) UMAP showing the batch information for SG cells. (B) Violin plot showing the distribution of pseudotime across different batches for SG cells. Scaled and smoothed expression of the leading edge genes in (C) Golgi Vesicle Transport gene set and (D) Cytoplasmic Translation gene set for SG cells across pseudotime.

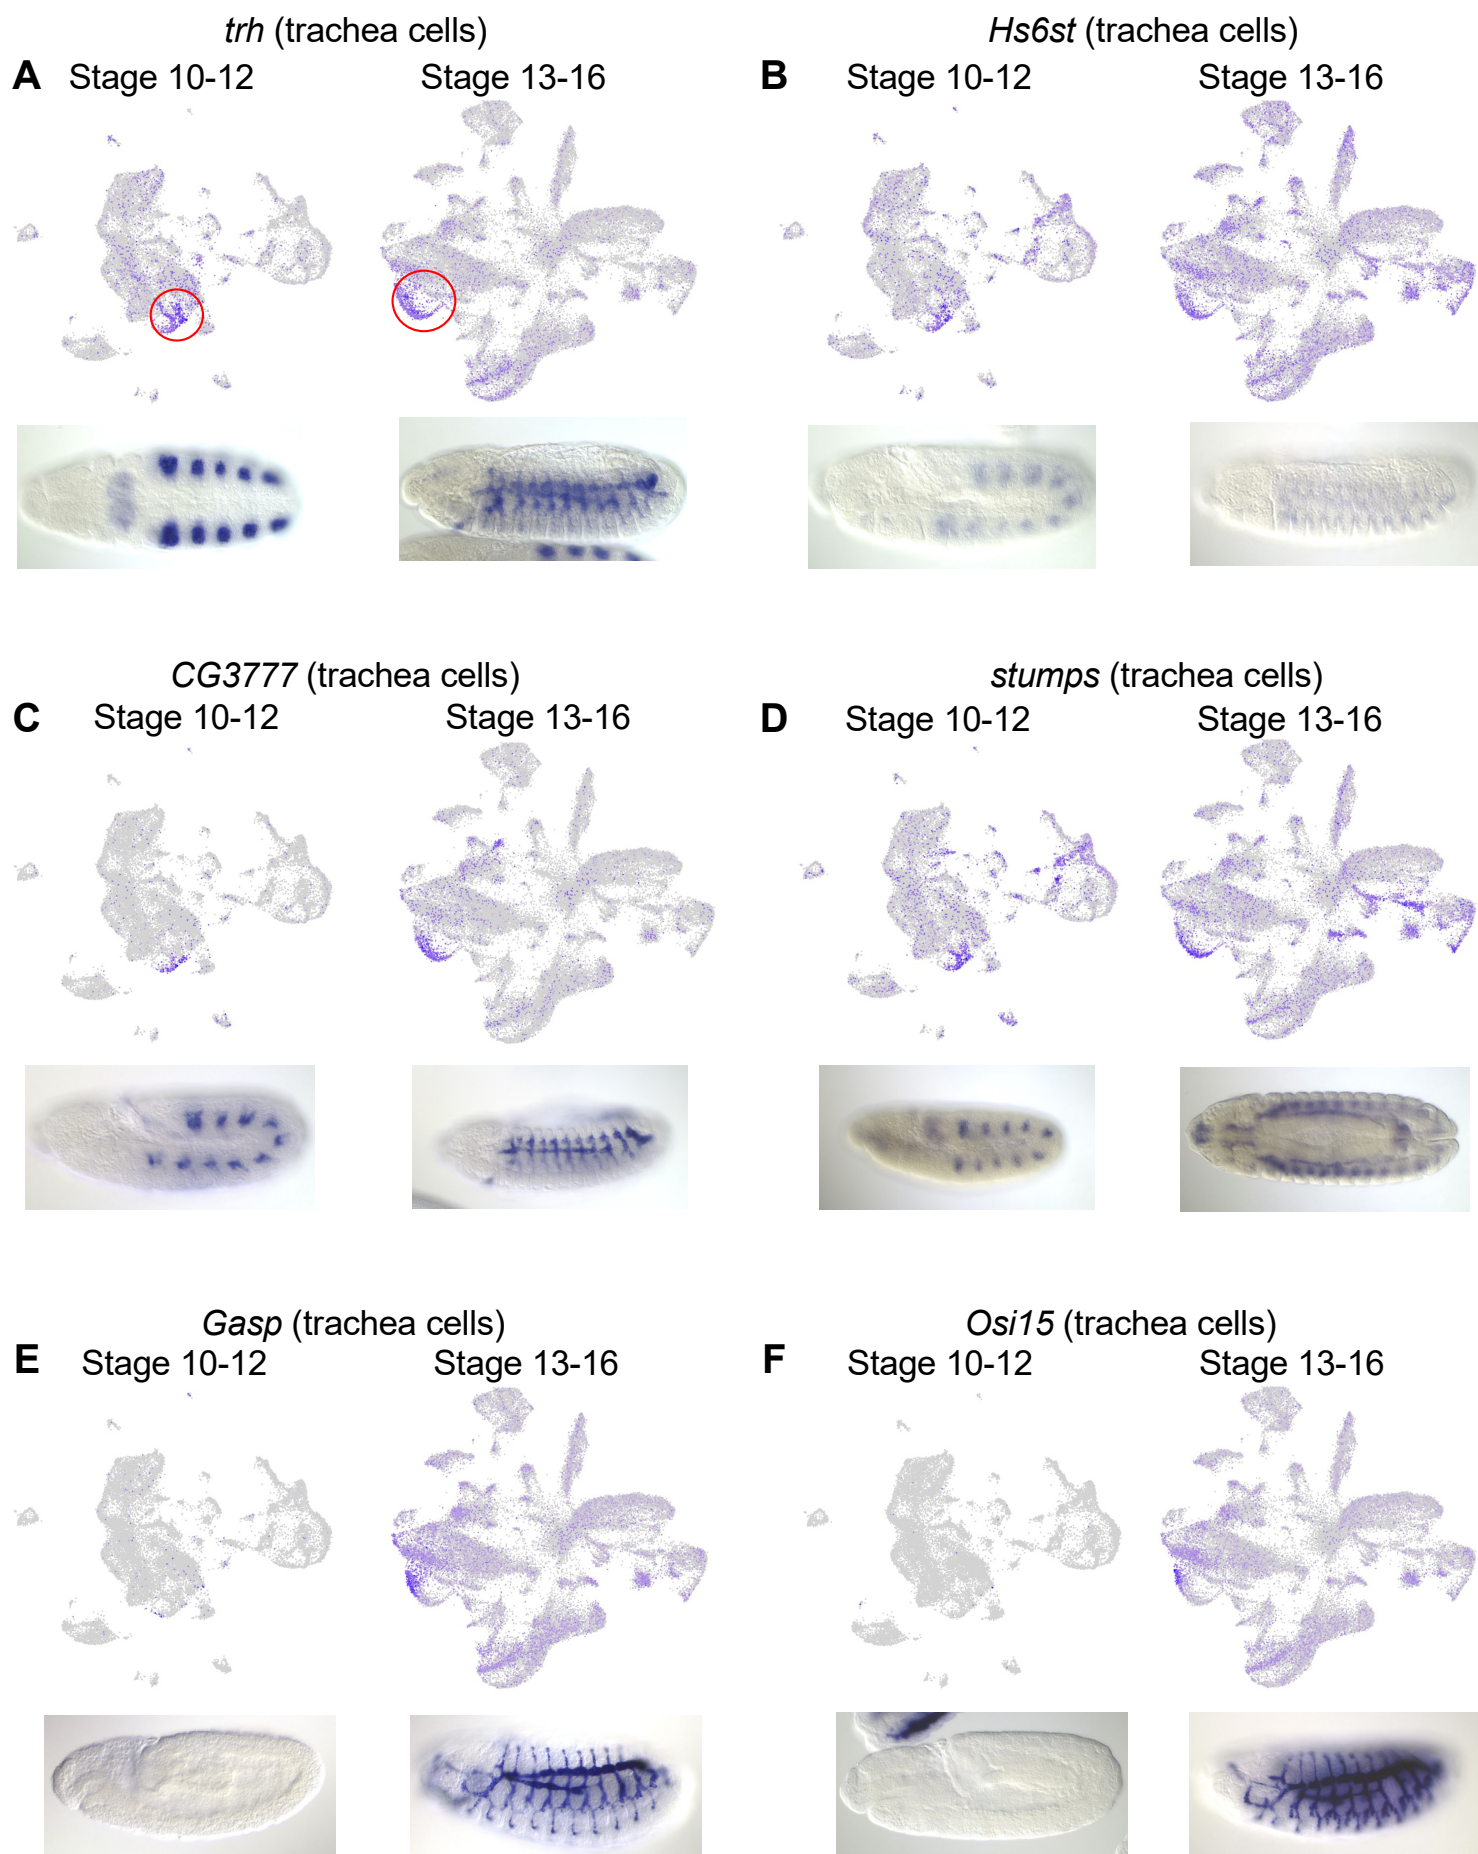

**Fig. S4.** UMAPs with six tracheal marker genes' expression ((A) *trh*, (B) *Hs6st*, (C) *CG3777*, (D) *stumps*, (E) *Gasp*, (F) *Osi15*) overlaid in both stage 10-12 and stage 13-16 embryos. Underneath the UMAPs are in situs from BDGP of the six tracheal marker genes in stage 10-12 and stage 13-16 embryos. The red circles indicate the approximate UMAP locations of tracheal cells for stage 10-12 and stage 13-16 embryos.



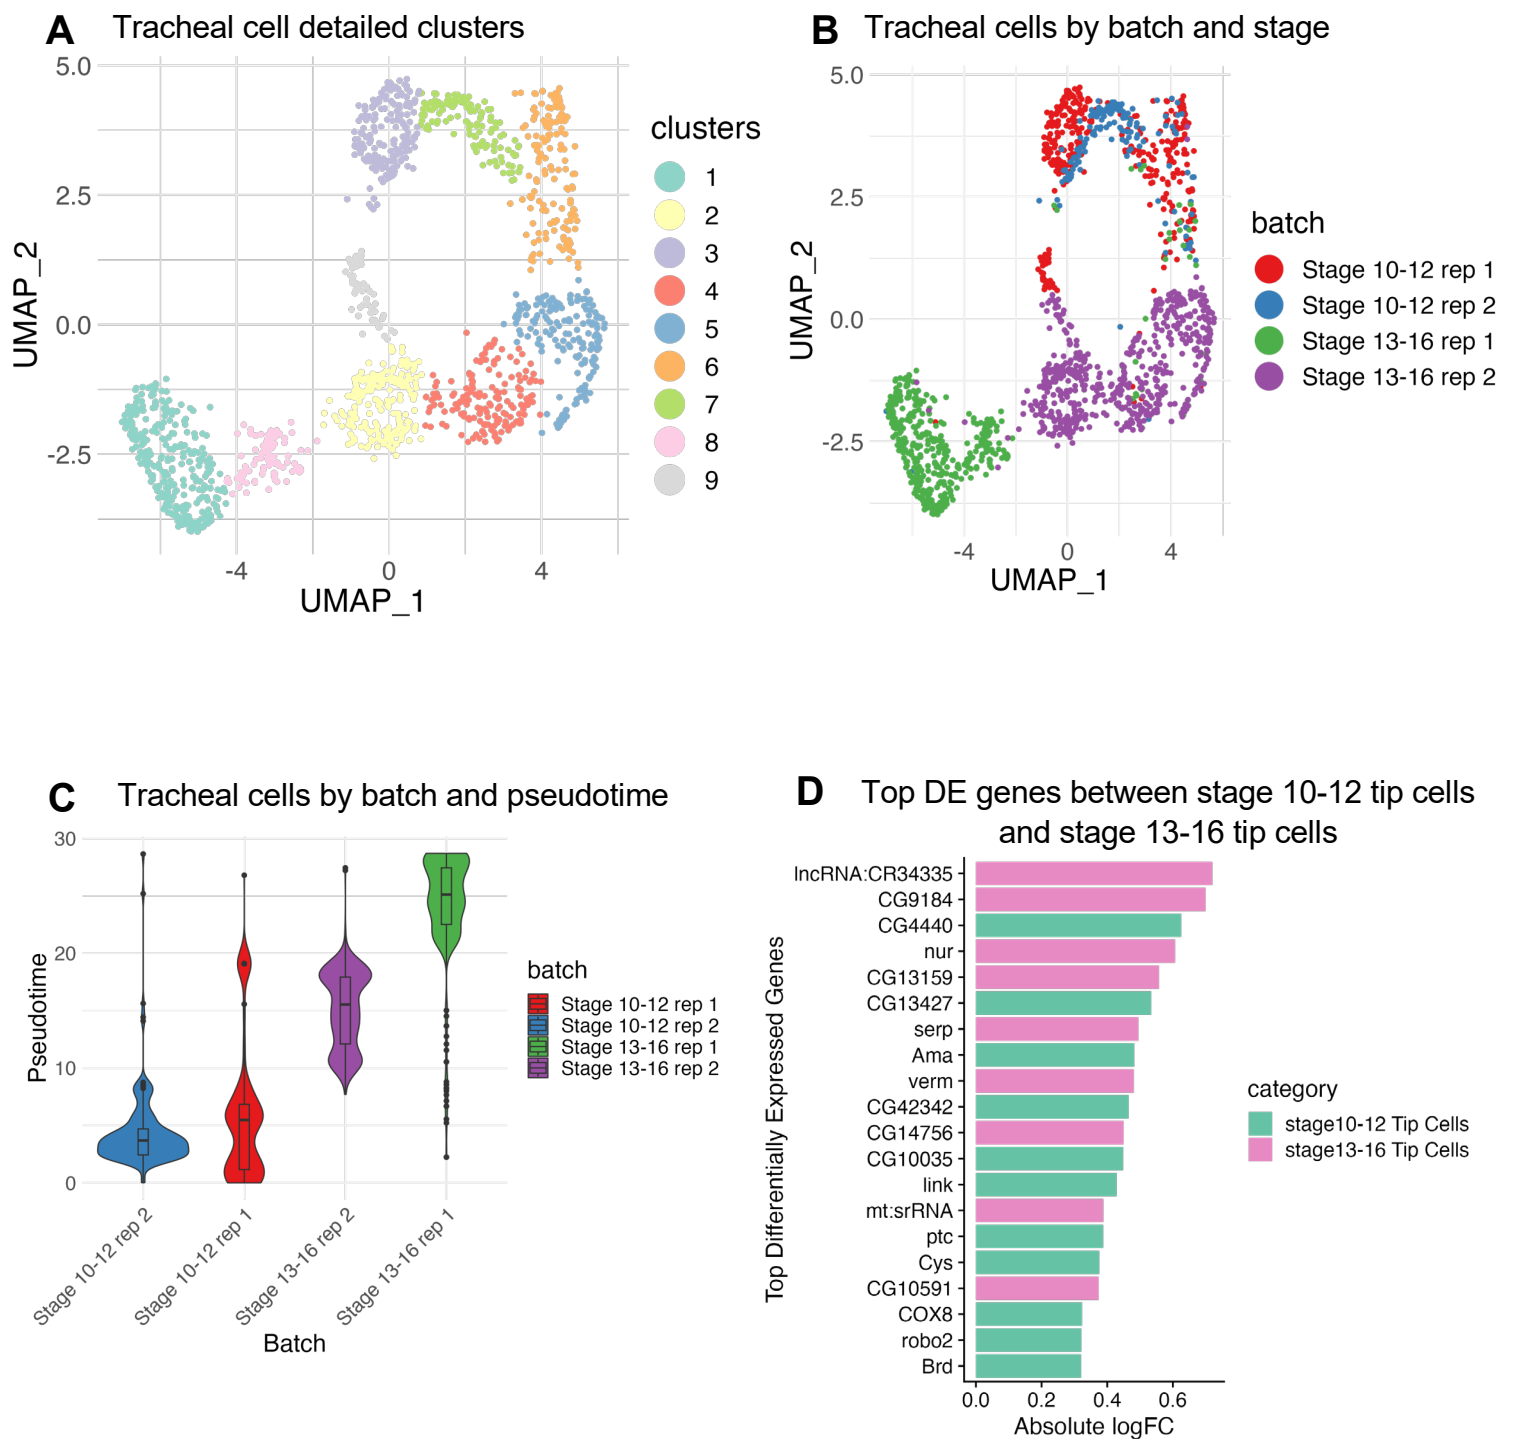

**Fig. S5.** UMAPs showing the (A) clusters and (B) batch information for tracheal cells. (C) Violin plot showing the distribution of pseudotime across different batches for tracheal cells. (D) Bar plot showing the top 20 most differentially expressed genes between stage 10-12 tip cells and stage 13-16 tip cells. The green color of the bar represents genes that are expressed higher in stage 10-12 tip cells. The purple color of the bar represents genes that are expressed higher in stage 13-16 tip cells.

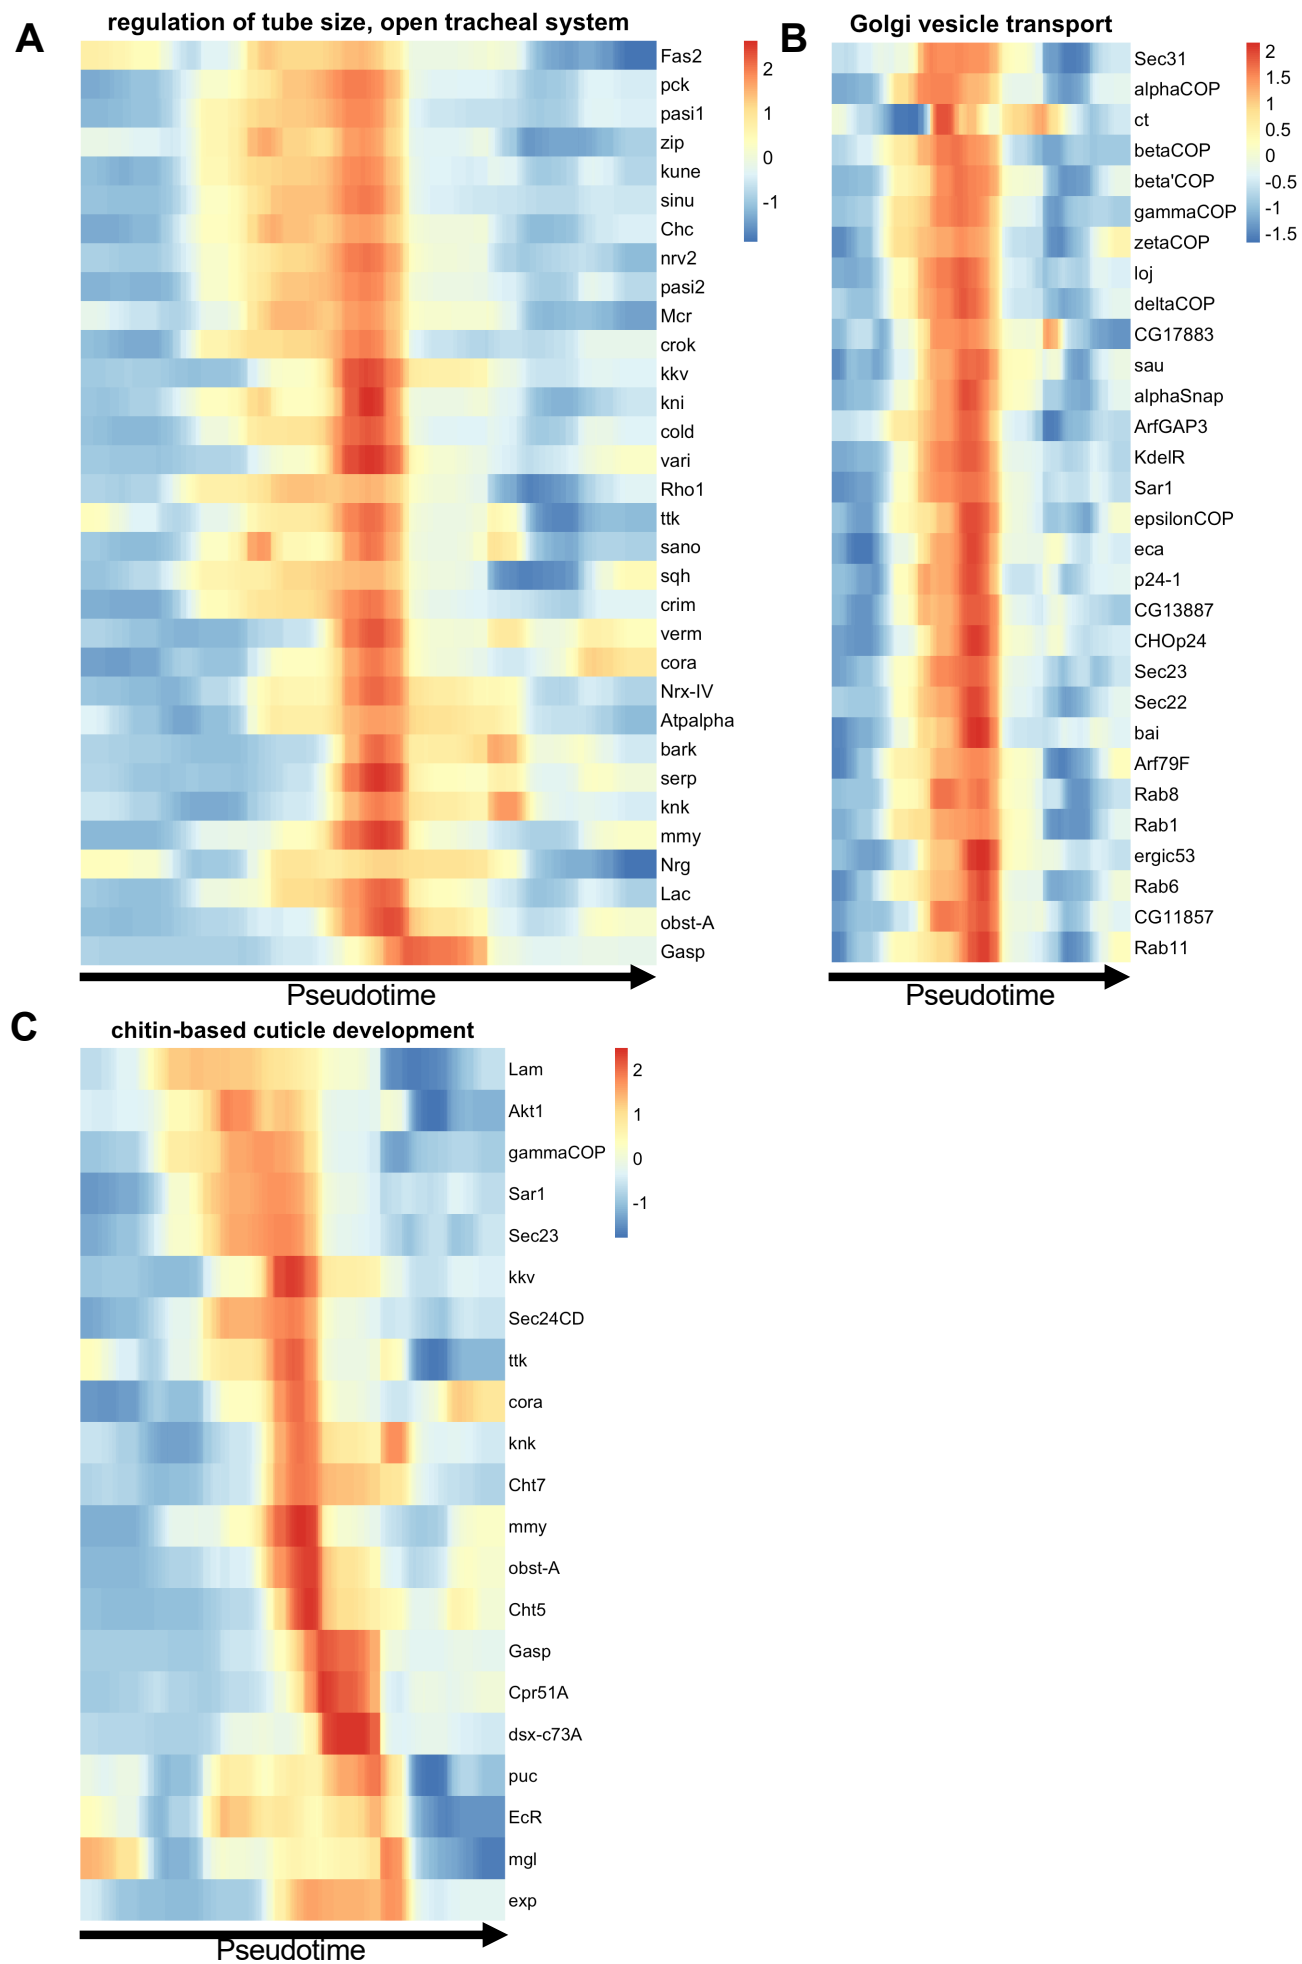

**Fig. S6.** Scaled and smoothed expression of leading edge genes in (A) regulation of tube size, open tracheal system, (B) Golgi vesicle transport and (C) chitin-based cuticle development gene sets for tracheal cells (excluding the tracheal tip cells) across pseudotime.



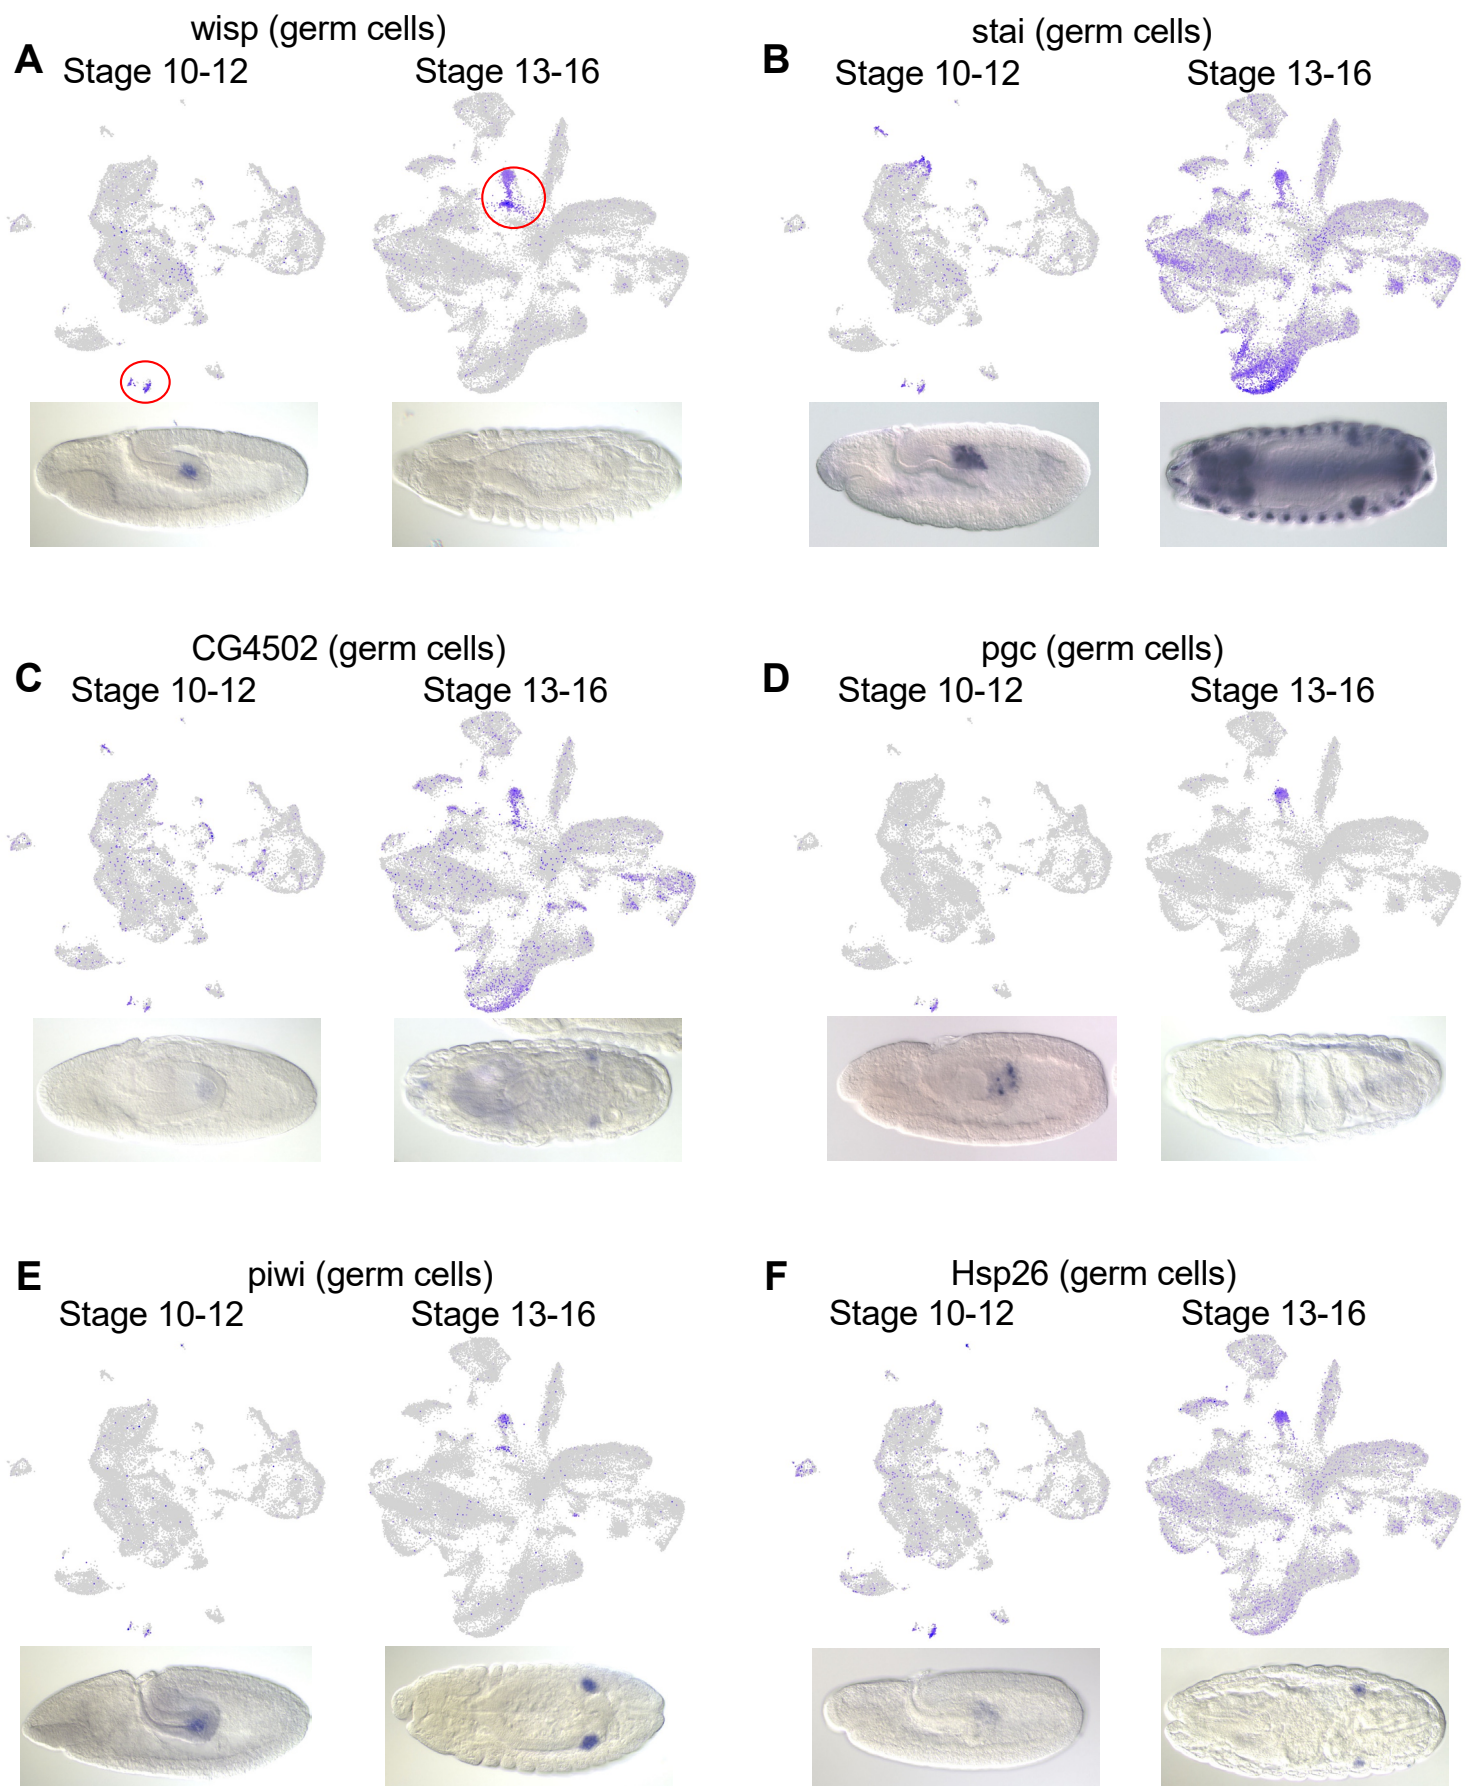

**Fig. S7.** UMAPs with six germ cell marker genes' expression ((A) *wisp*, (B) *stai*, (C) *CG4502*, (D) *pgc*, (E) *piwi*, (F) *Hsp26*) overlaid in both stage 10-12 and stage 13-16 embryos. Note that this is the only late-stage embryo image available at BDGP for *wisp*. Underneath the UMAPs are in-situs from BDGP of the six germ cell marker genes in stage 10-12 and stage 13-16 embryos. The red circles indicate the approximate UMAP locations of germ cells for stage 10-12 and stage 13-16 embryos.

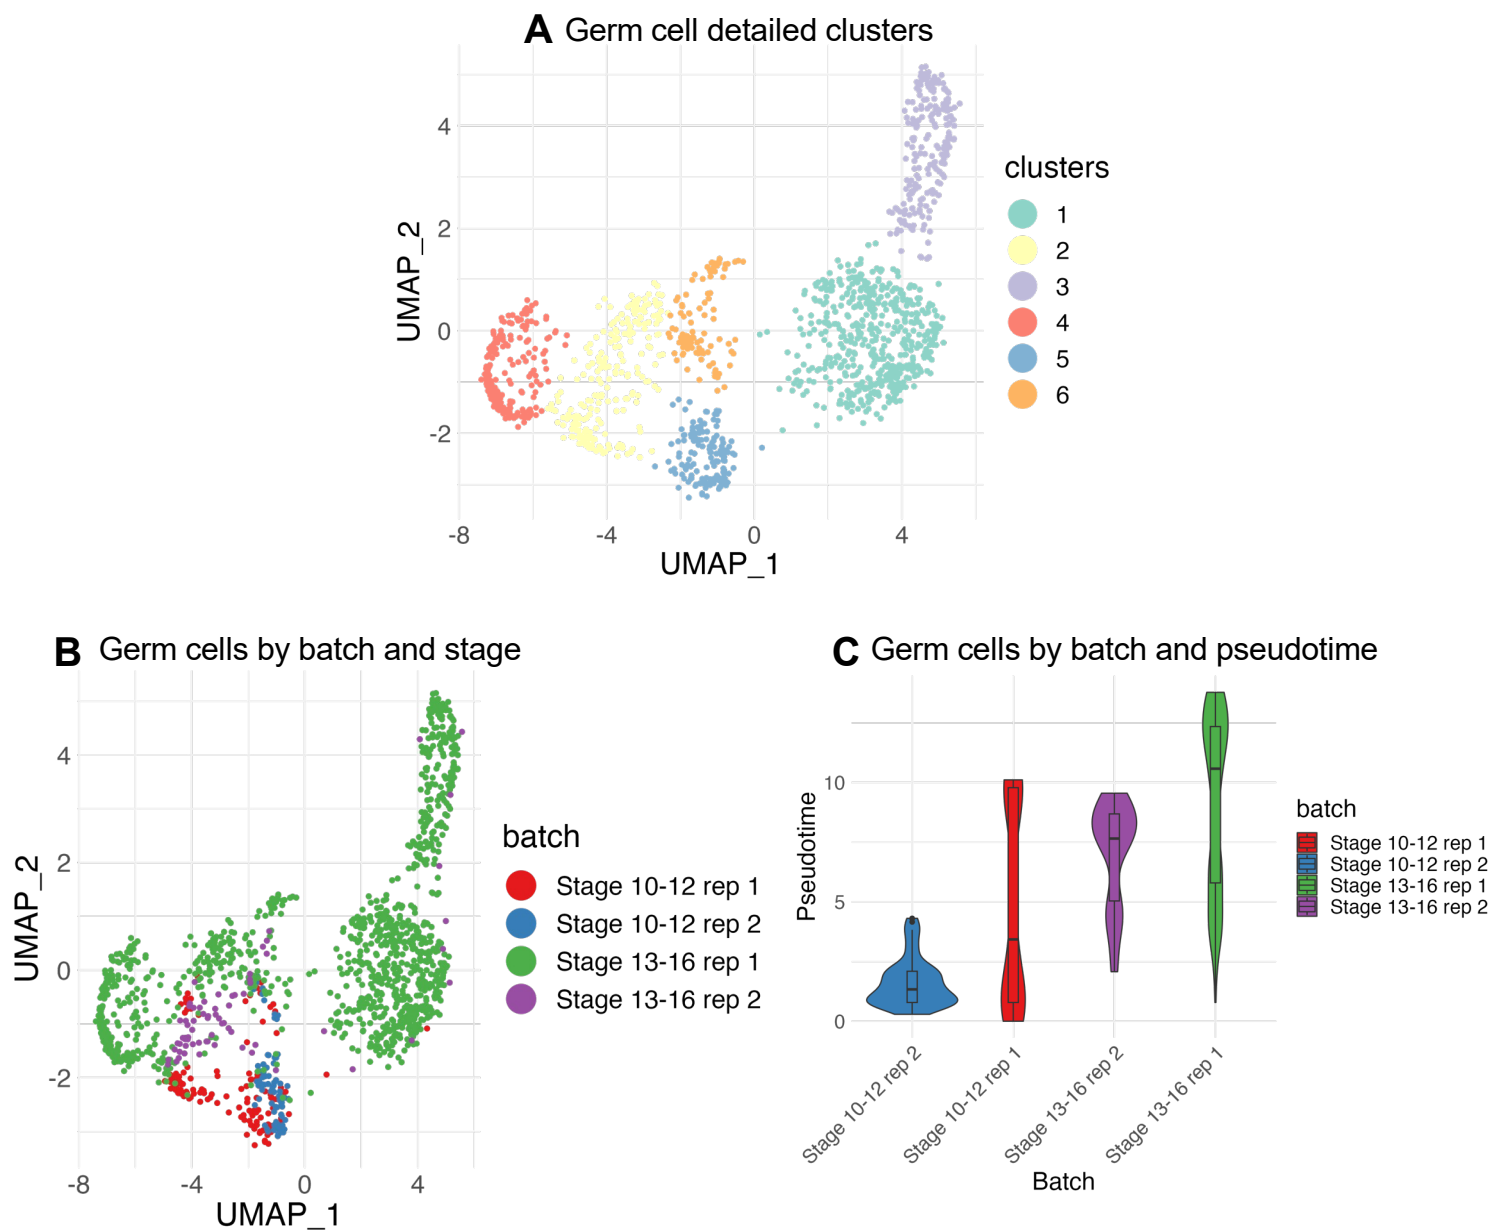

**Fig. S8.** UMAPs showing the (A) clusters and (B) batch information for germ cells. (C) Violin plot showing the distribution of pseudotime for the main trajectory (Early Germ Cells, Interm. Germ Cells 1, Interm. Germ Cells 2, Late Germ Cells) across different batches for germ cells.



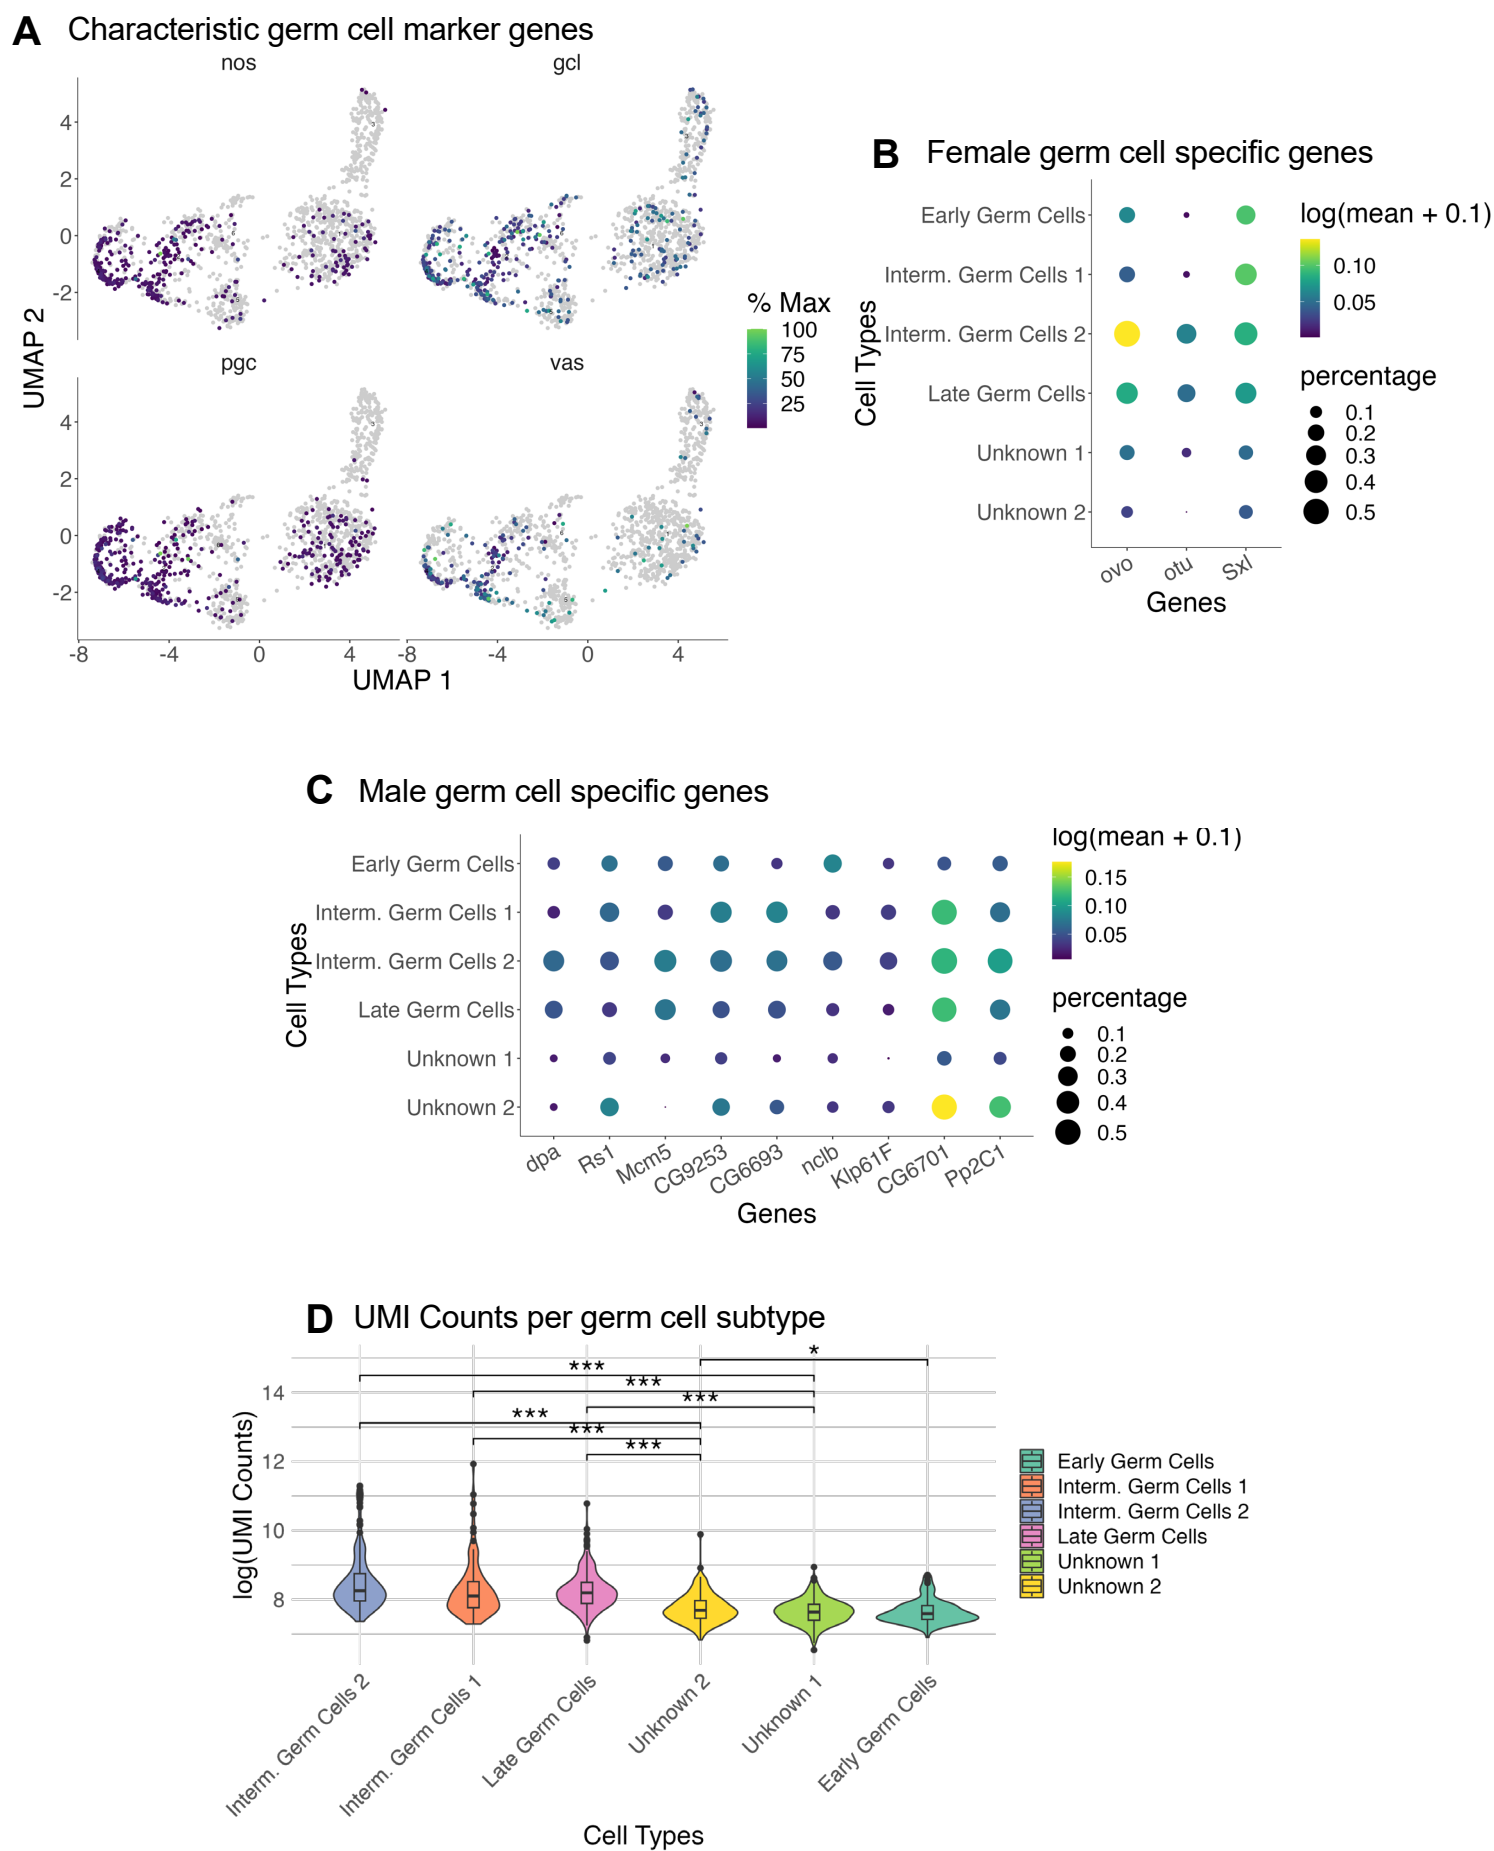

**Fig. S9.** (A) UMAPs of germ cells with characteristic germ cell marker genes overlaid. Dot plots of characteristic marker genes for (B) female GC specificity and (C) male GC specificity. The size of the dot represents the percentage of cells in the GC sub-population in which the gene is detected and the color of the dot represents the mean expression of the gene in the GC sub-population. (D) Violin plot of log UMI counts across different GC sub-populations.

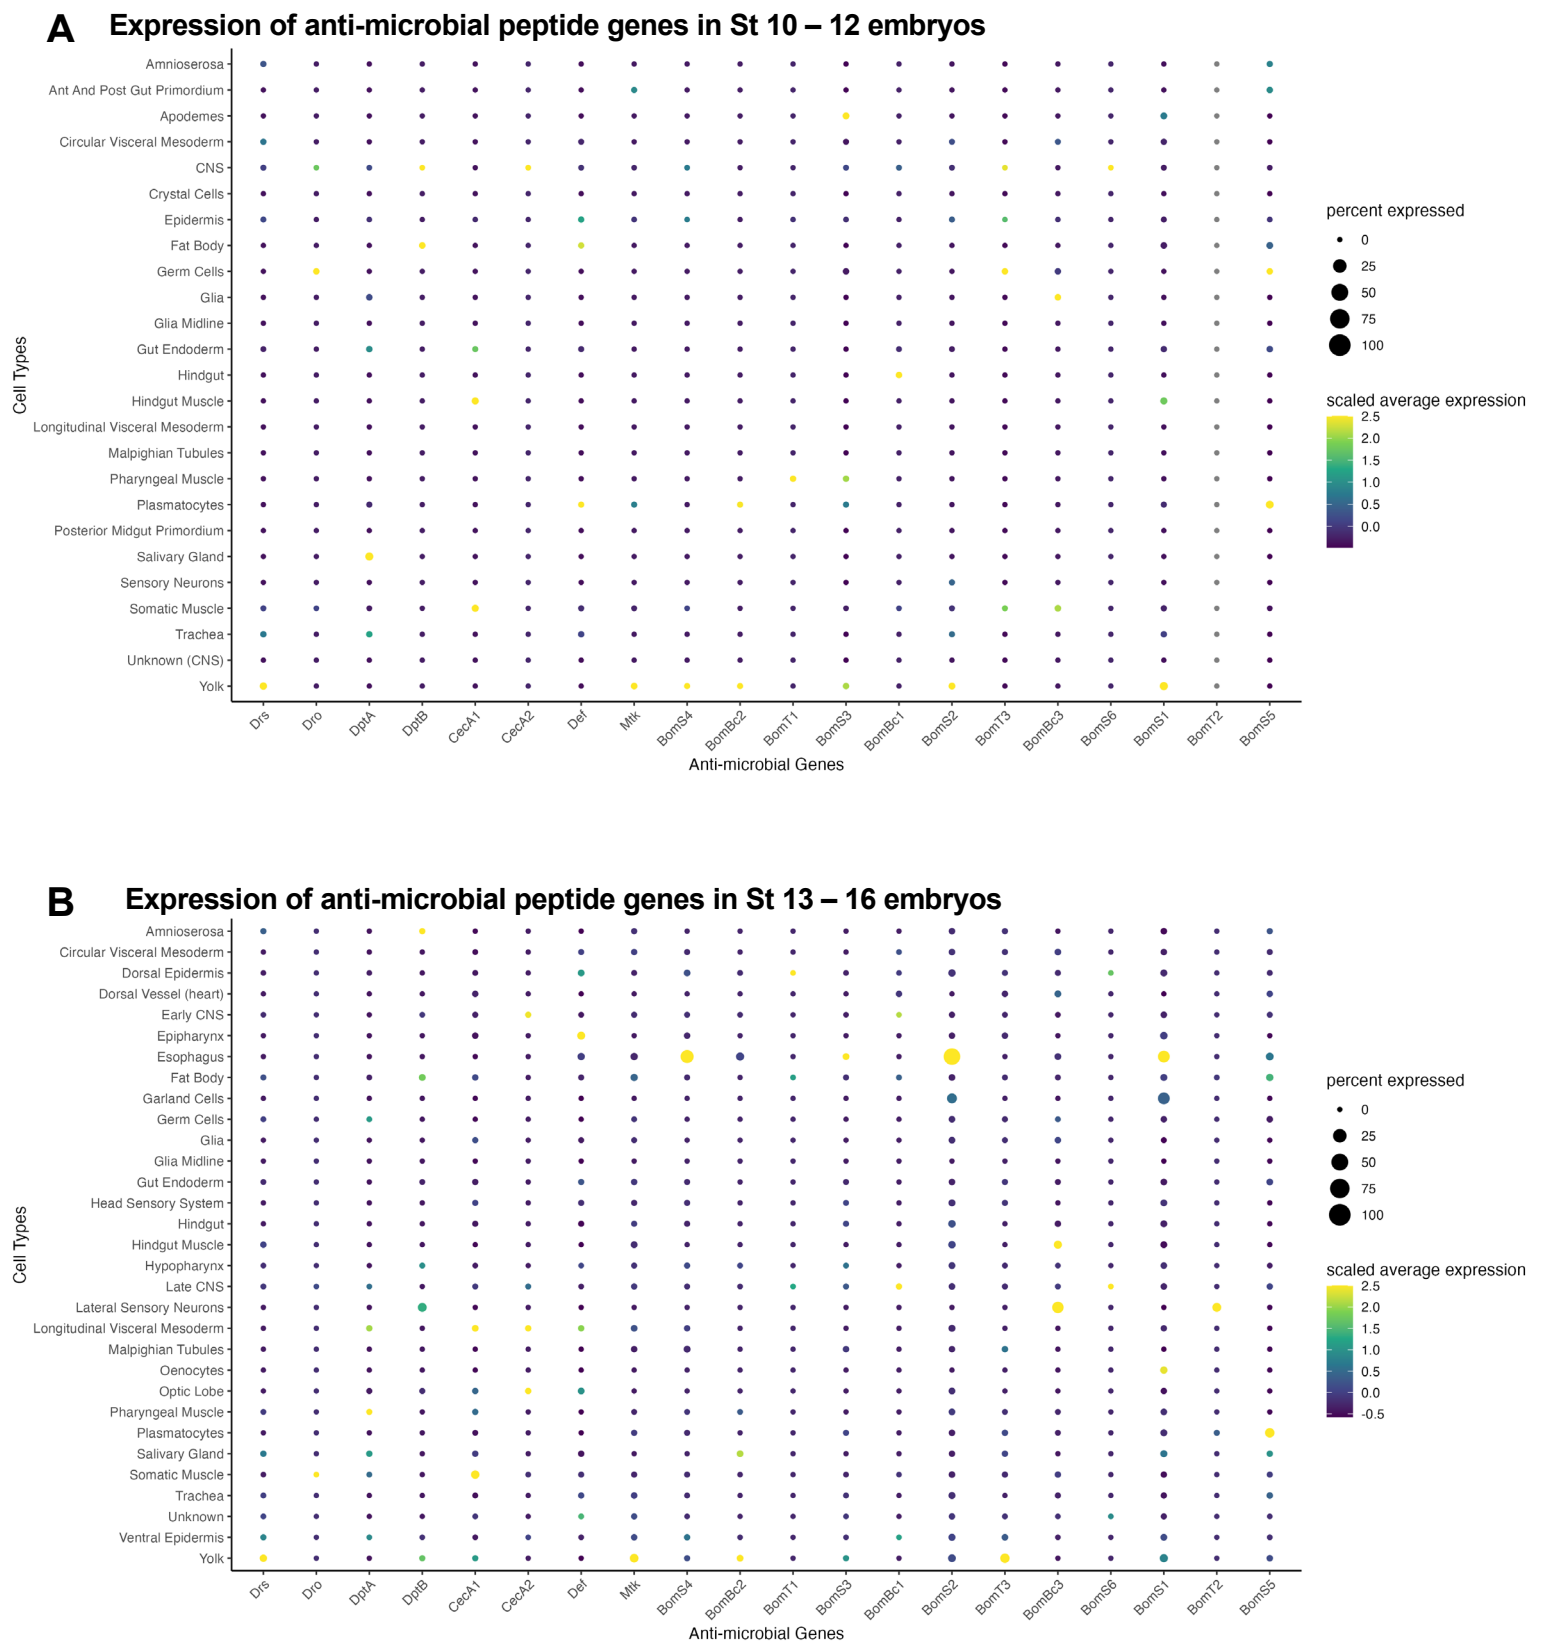

**Fig. S10.** Dot plots of anti-microbial genes expressions across cell types in (A) stage 10-12 embryos and (B) stage 13-16 embryos. The size of the dot represents the percentage of cells in the embryonic cell type in which the gene is detected and the color of the dot represents the mean expression of the gene in the embryonic cell type.



### A Adult Cell Types

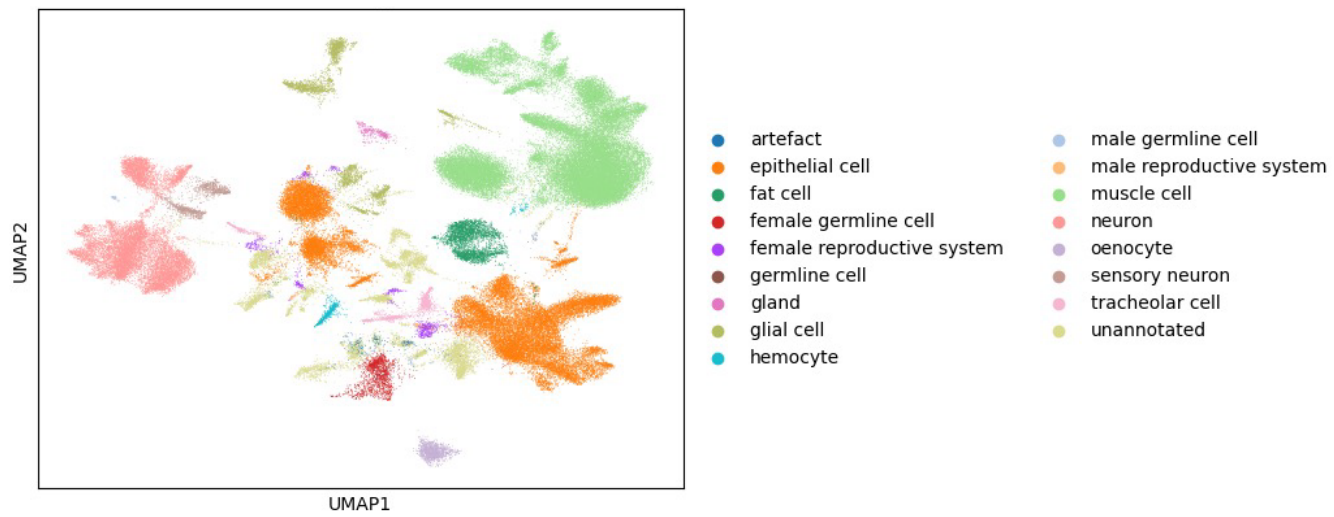

### B *Ilp6* expression

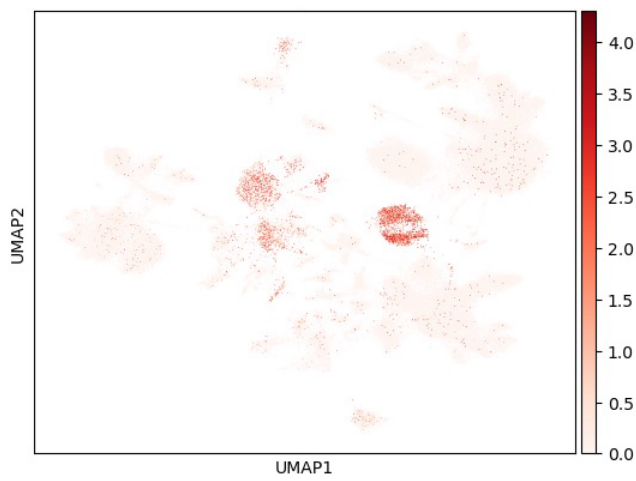

### C High *Ilp6* expression corresponds to fat body cells

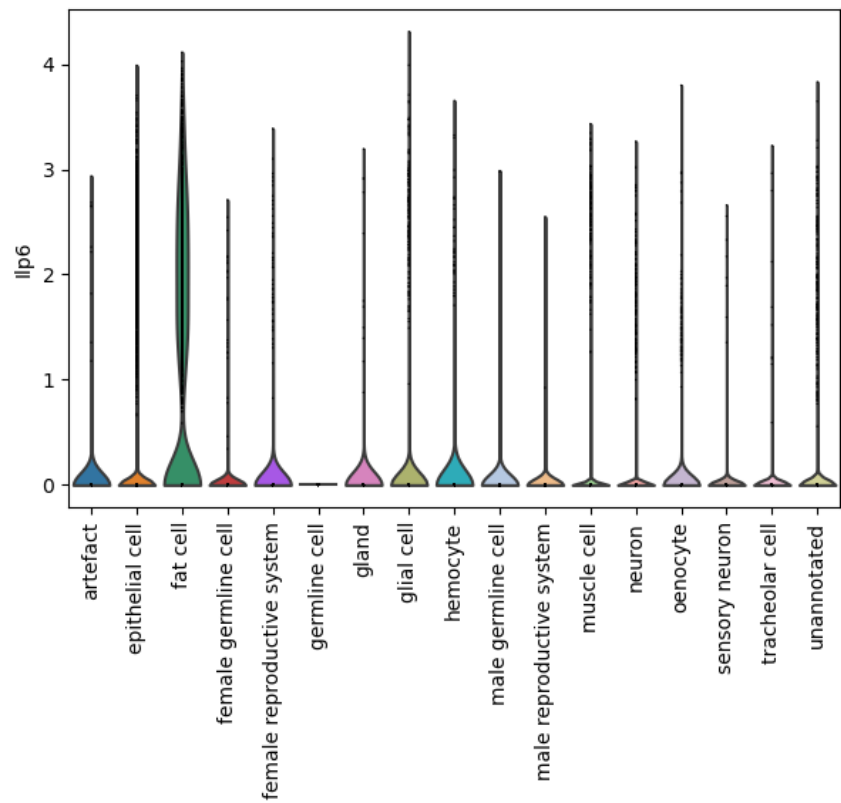

**Fig. S11.** *Ilp6* expression patterns in adult fruit fly scRNA-seq from Fly Cell Atlas. (A) UMAP showing adult fruit fly cell types. (B) UMAP showing *Ilp6* expression. (C) Violin plot of *Ilp6* expression across different adult fruit fly cell types.

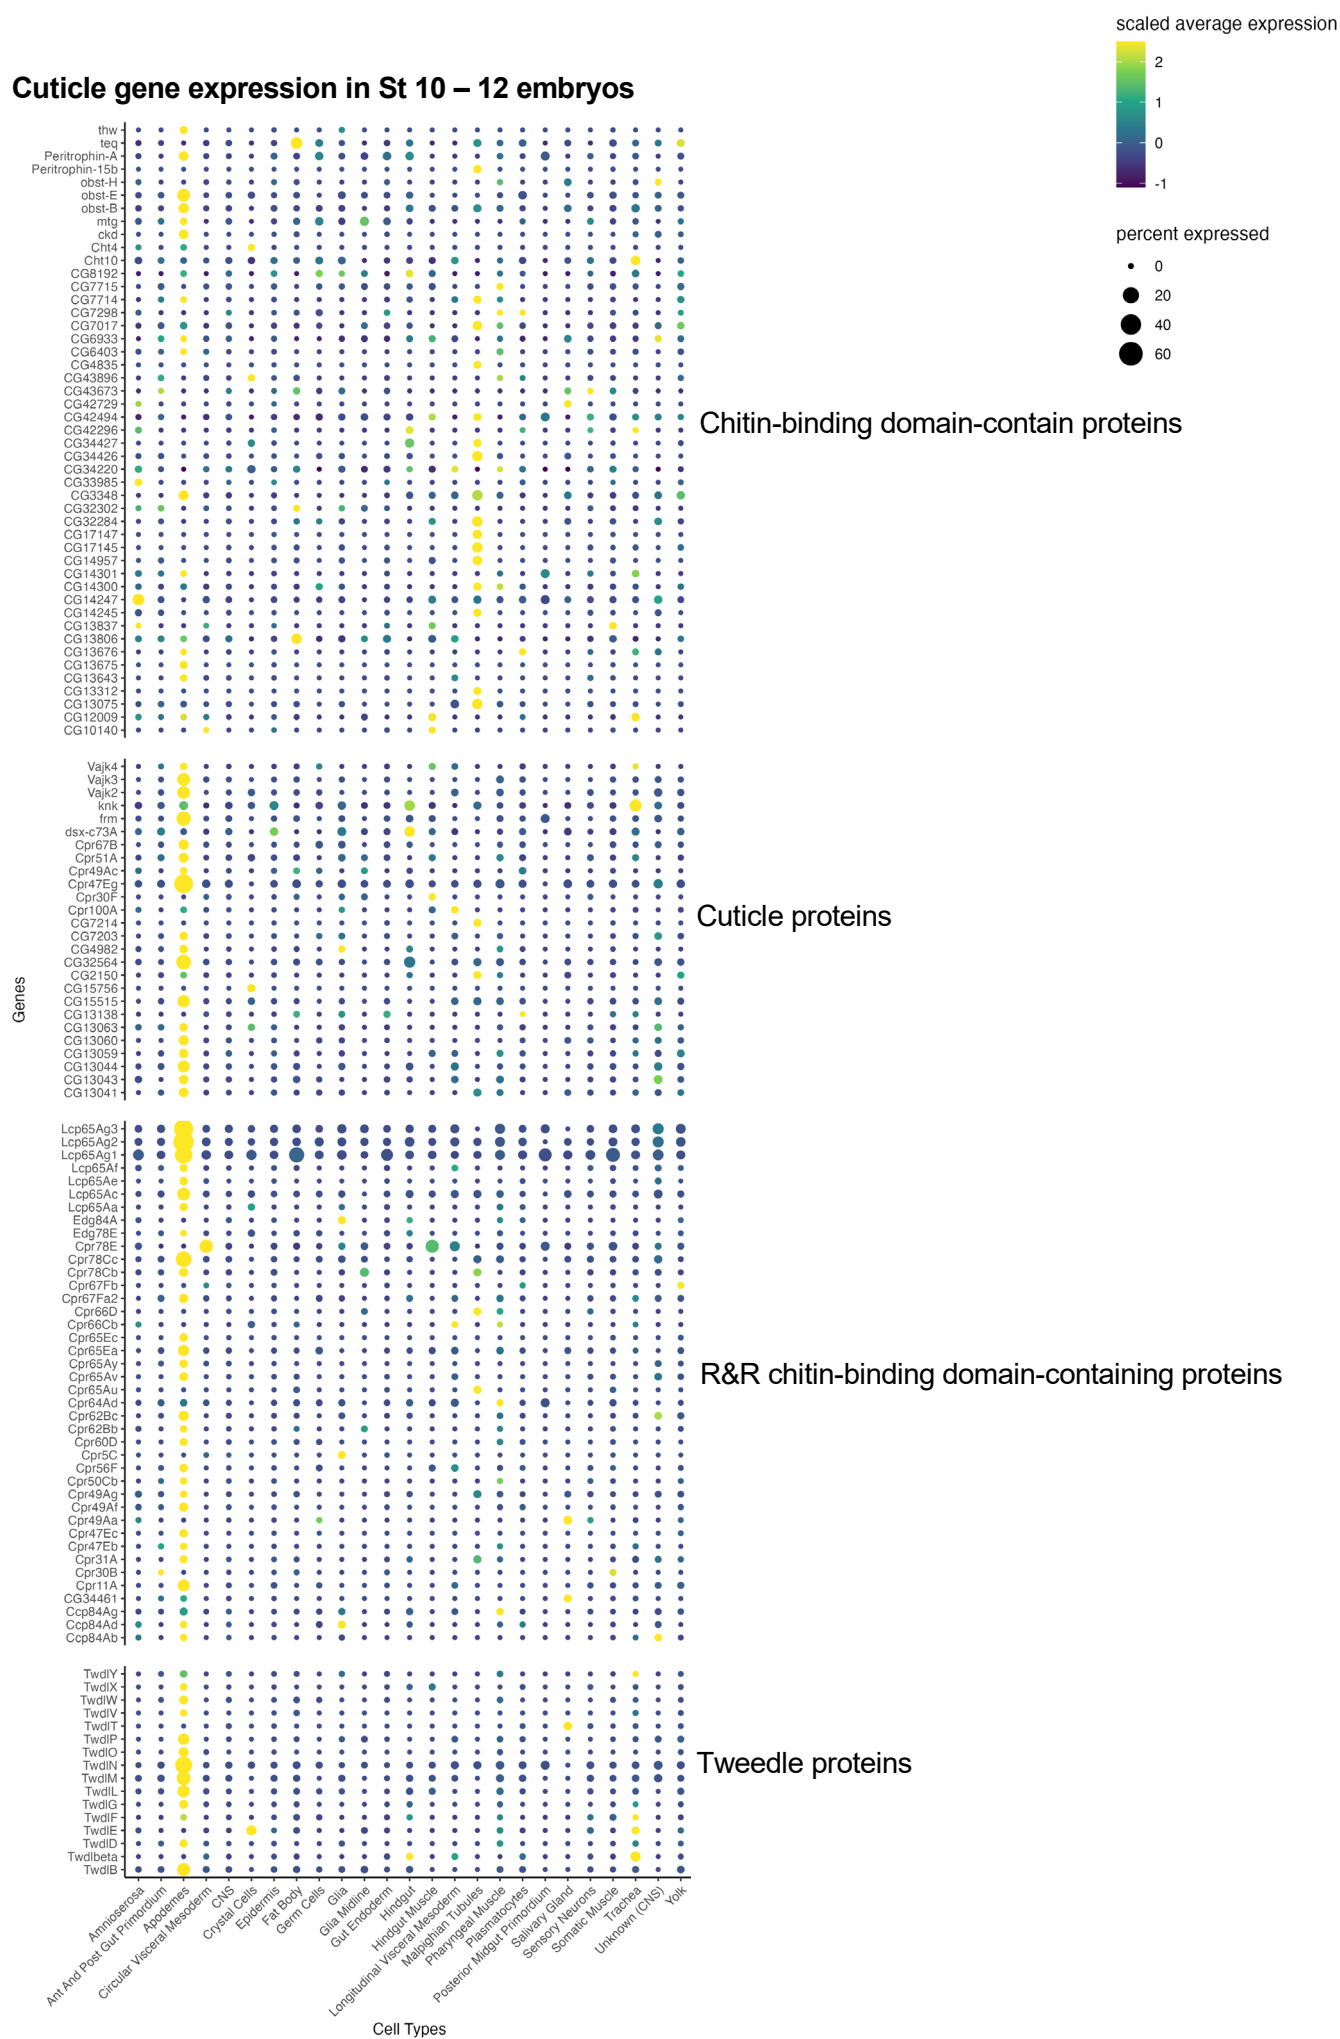

**Fig. S12.** Dot plot of cuticle genes across cell types in stage 10-12 embryos. Genes that have percentage of expressing cells less than 1% in all the cell types were removed as lowly expressed genes. The size of the dot represents the percentage of cells in the embryonic cell type in which the gene is detected and the color of the dot represents the mean expression of the gene in the embryonic cell type.

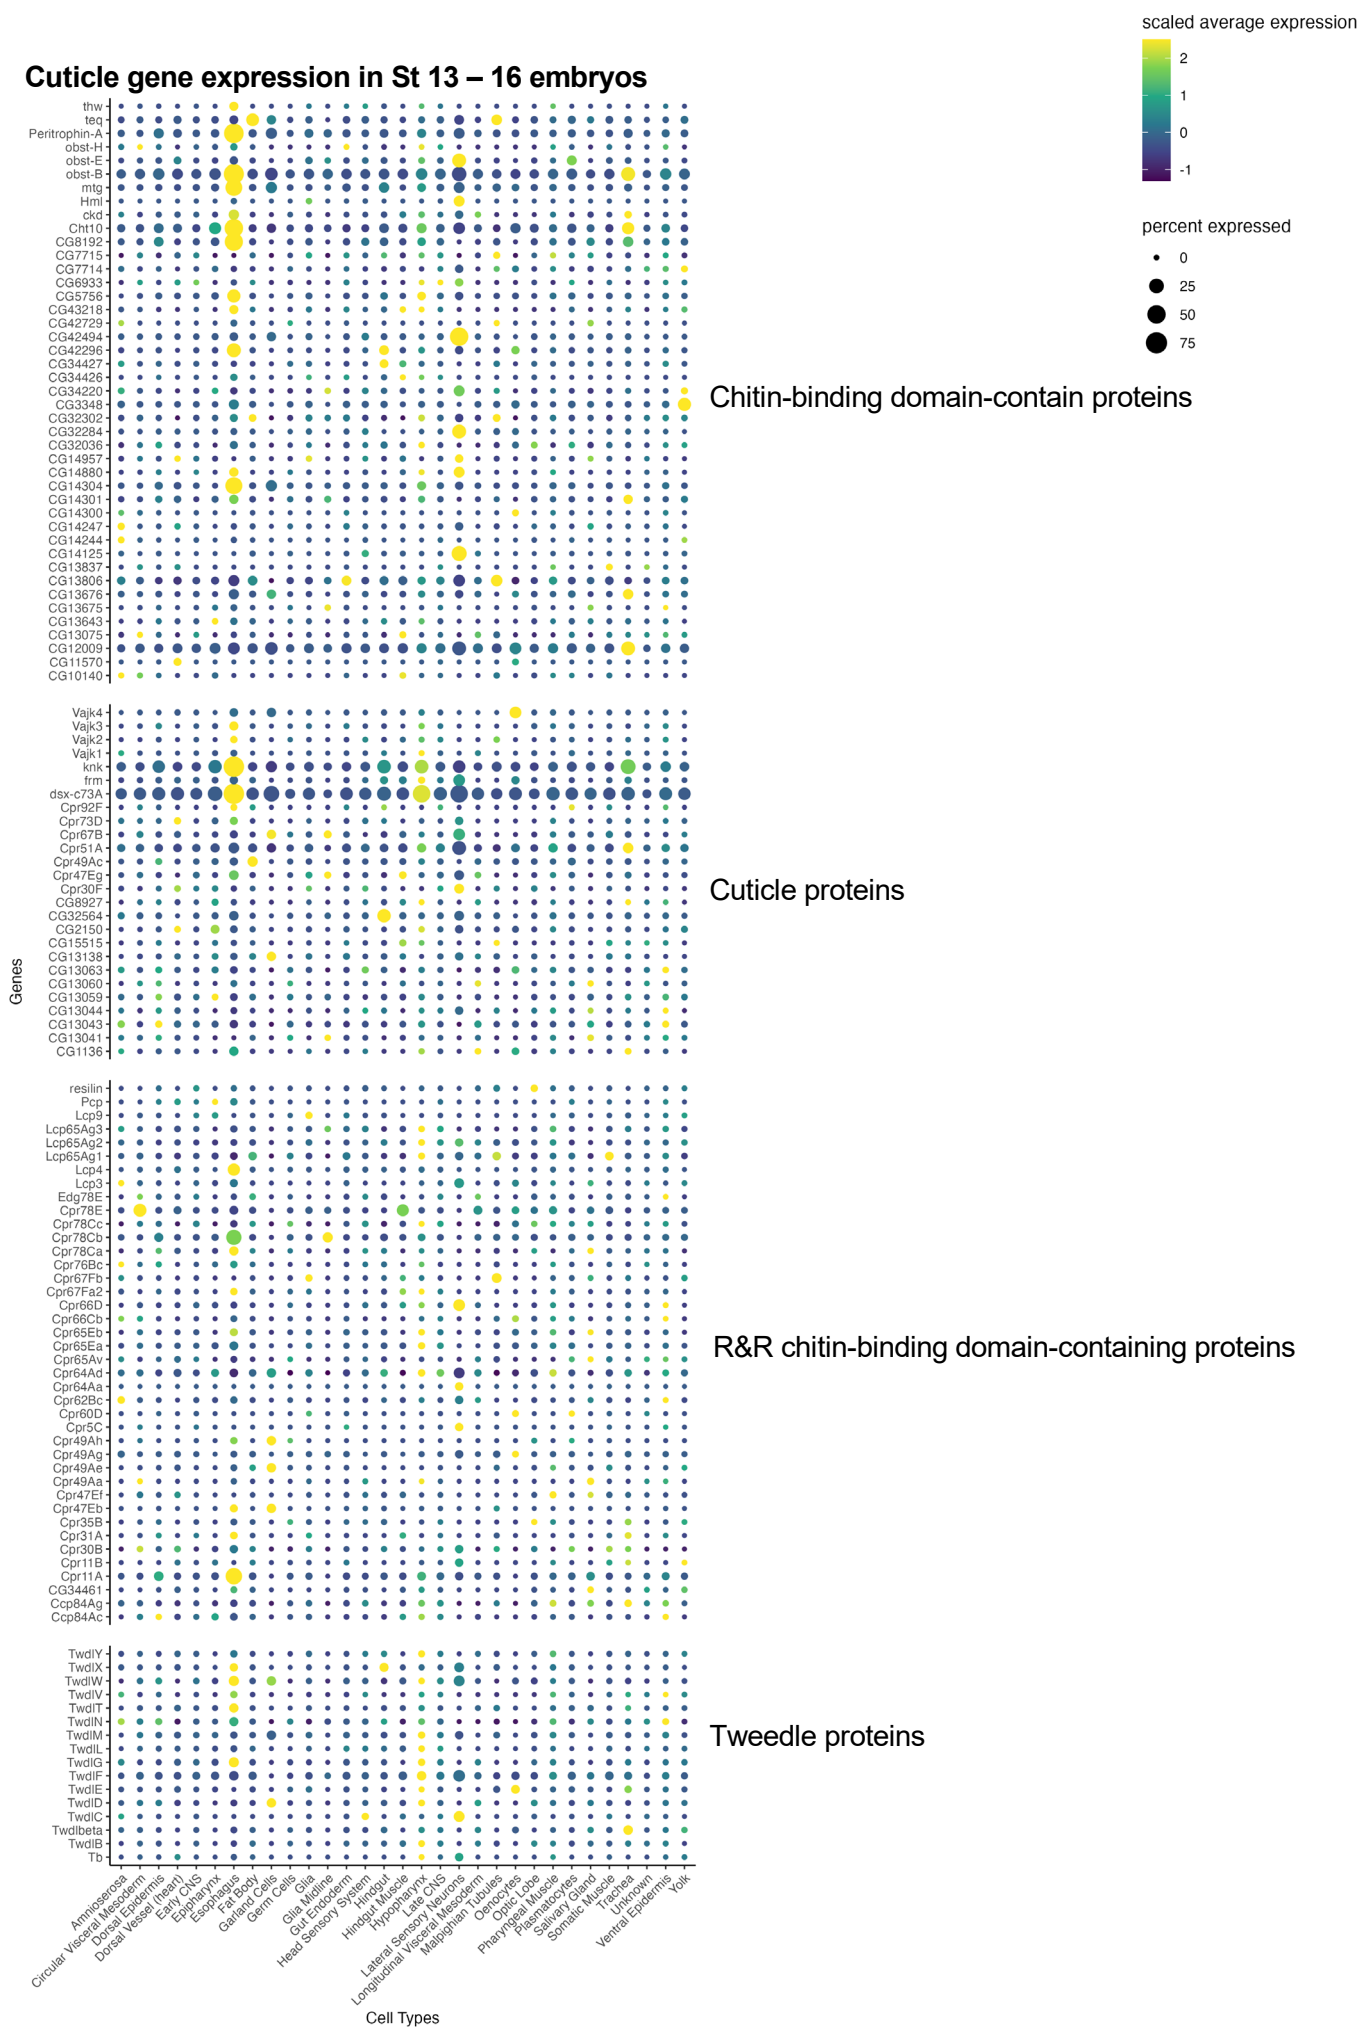

**Fig. S13.** Dot plot of cuticle genes across cell types in stage 13-16 embryos. Genes that have percentage of expressing cells less than 1% in all of the cell types are removed as lowly expressed genes. The size of the dot represents the percentage of cells in the embryonic cell type in which the gene is detected and the color of the dot represents the mean expression of the gene in the embryonic cell type.

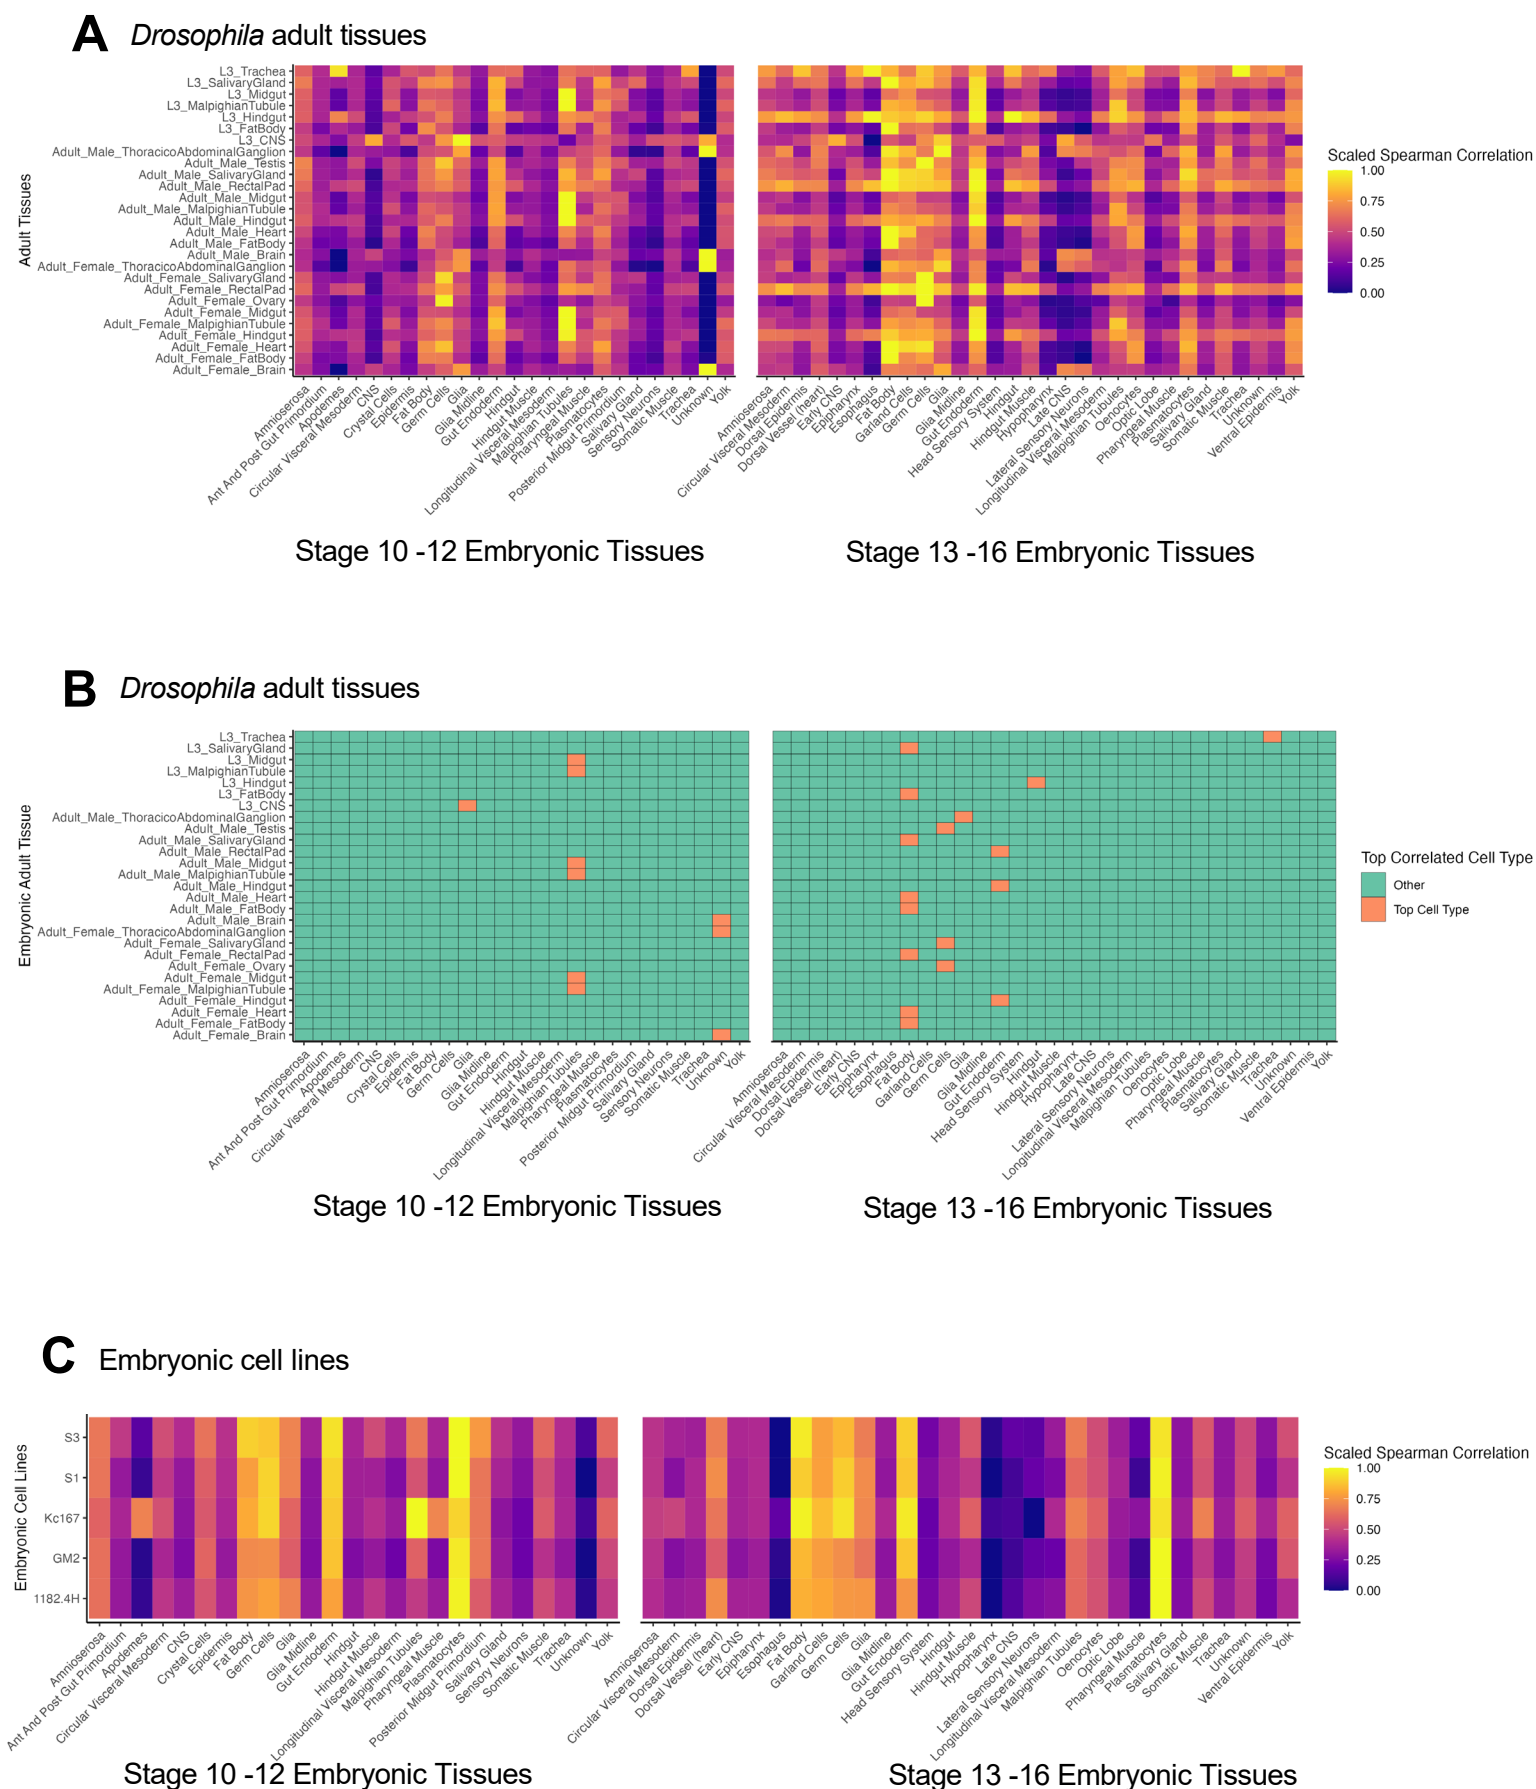

**Fig. S14.** Heatmaps of (A) scaled Spearman correlation between adult *Drosophila* tissue expression profiles and average pseudo-bulk expression profiles from single-cell type in terms of the 1604 tissue marker genes and (B) top correlated single-cell cell type clusters for adult *Drosophila* tissues. (C) Heatmap of scaled Spearman correlation between *Drosophila* embryonic cell lines' expression profiles and average pseudo-bulk expression profiles from single-cell cell type clusters in terms of the 1604 tissue marker genes.



**A Comparisons between the scRNA-seq cell types in this study and in other published work, St 10-12**

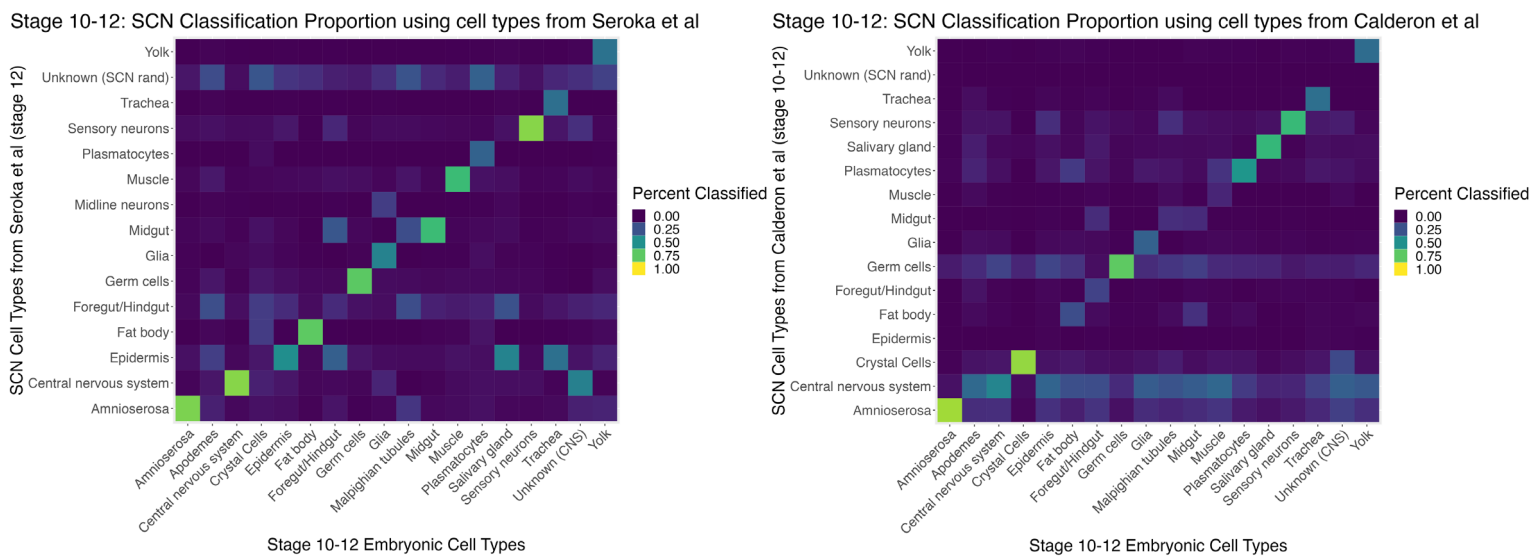

**B Comparisons between the scRNA-seq cell types in this study and in other published work, St 13-16**

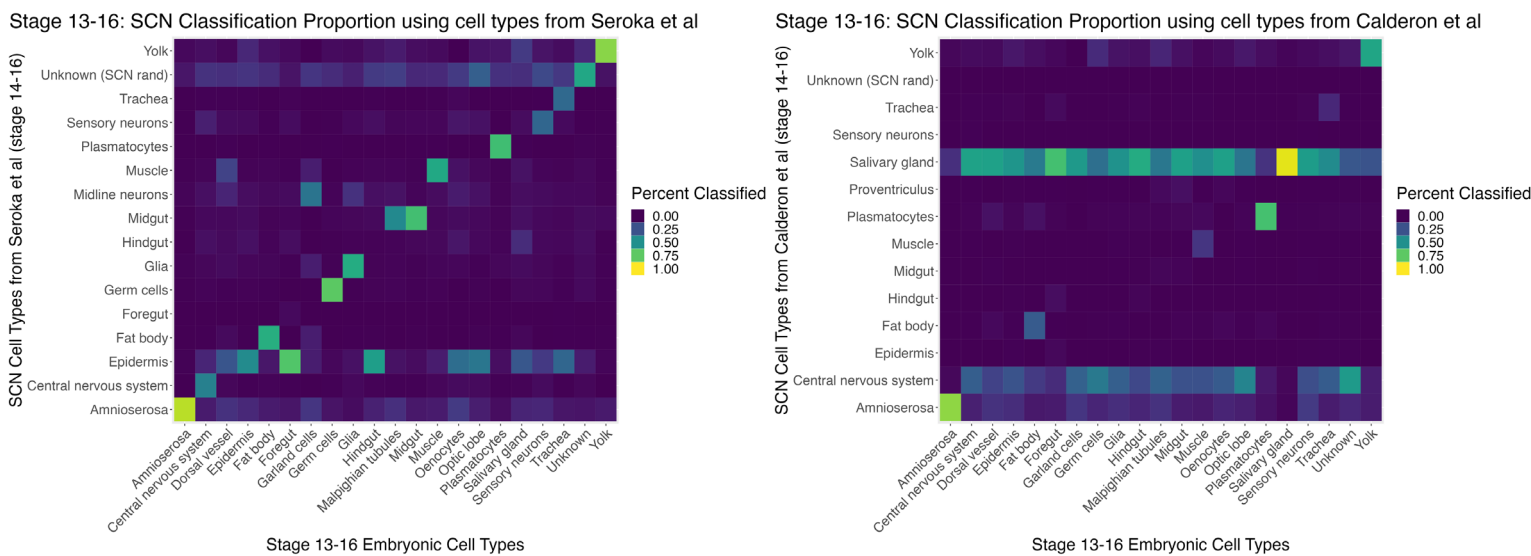

**Fig. S15.** Classification results of SingleCellNet classifier trained on single-cell data from Seroka et al and Calderon et al and applied on the single-cell data in this study. Heatmaps showing the percentage of stage 10-12 cells in our embryonic cell-types that are classified as harmonized cell types from (A) Seroka et al (on the left) and Calderon et al (on the right). Heatmaps showing the percentage of stage 13-16 cells in our embryonic cell-types that are classified as harmonized cell types from (B) Seroka et al (on the left) and Calderon et al (on the right).

## Early Cluster 25 Apodemes

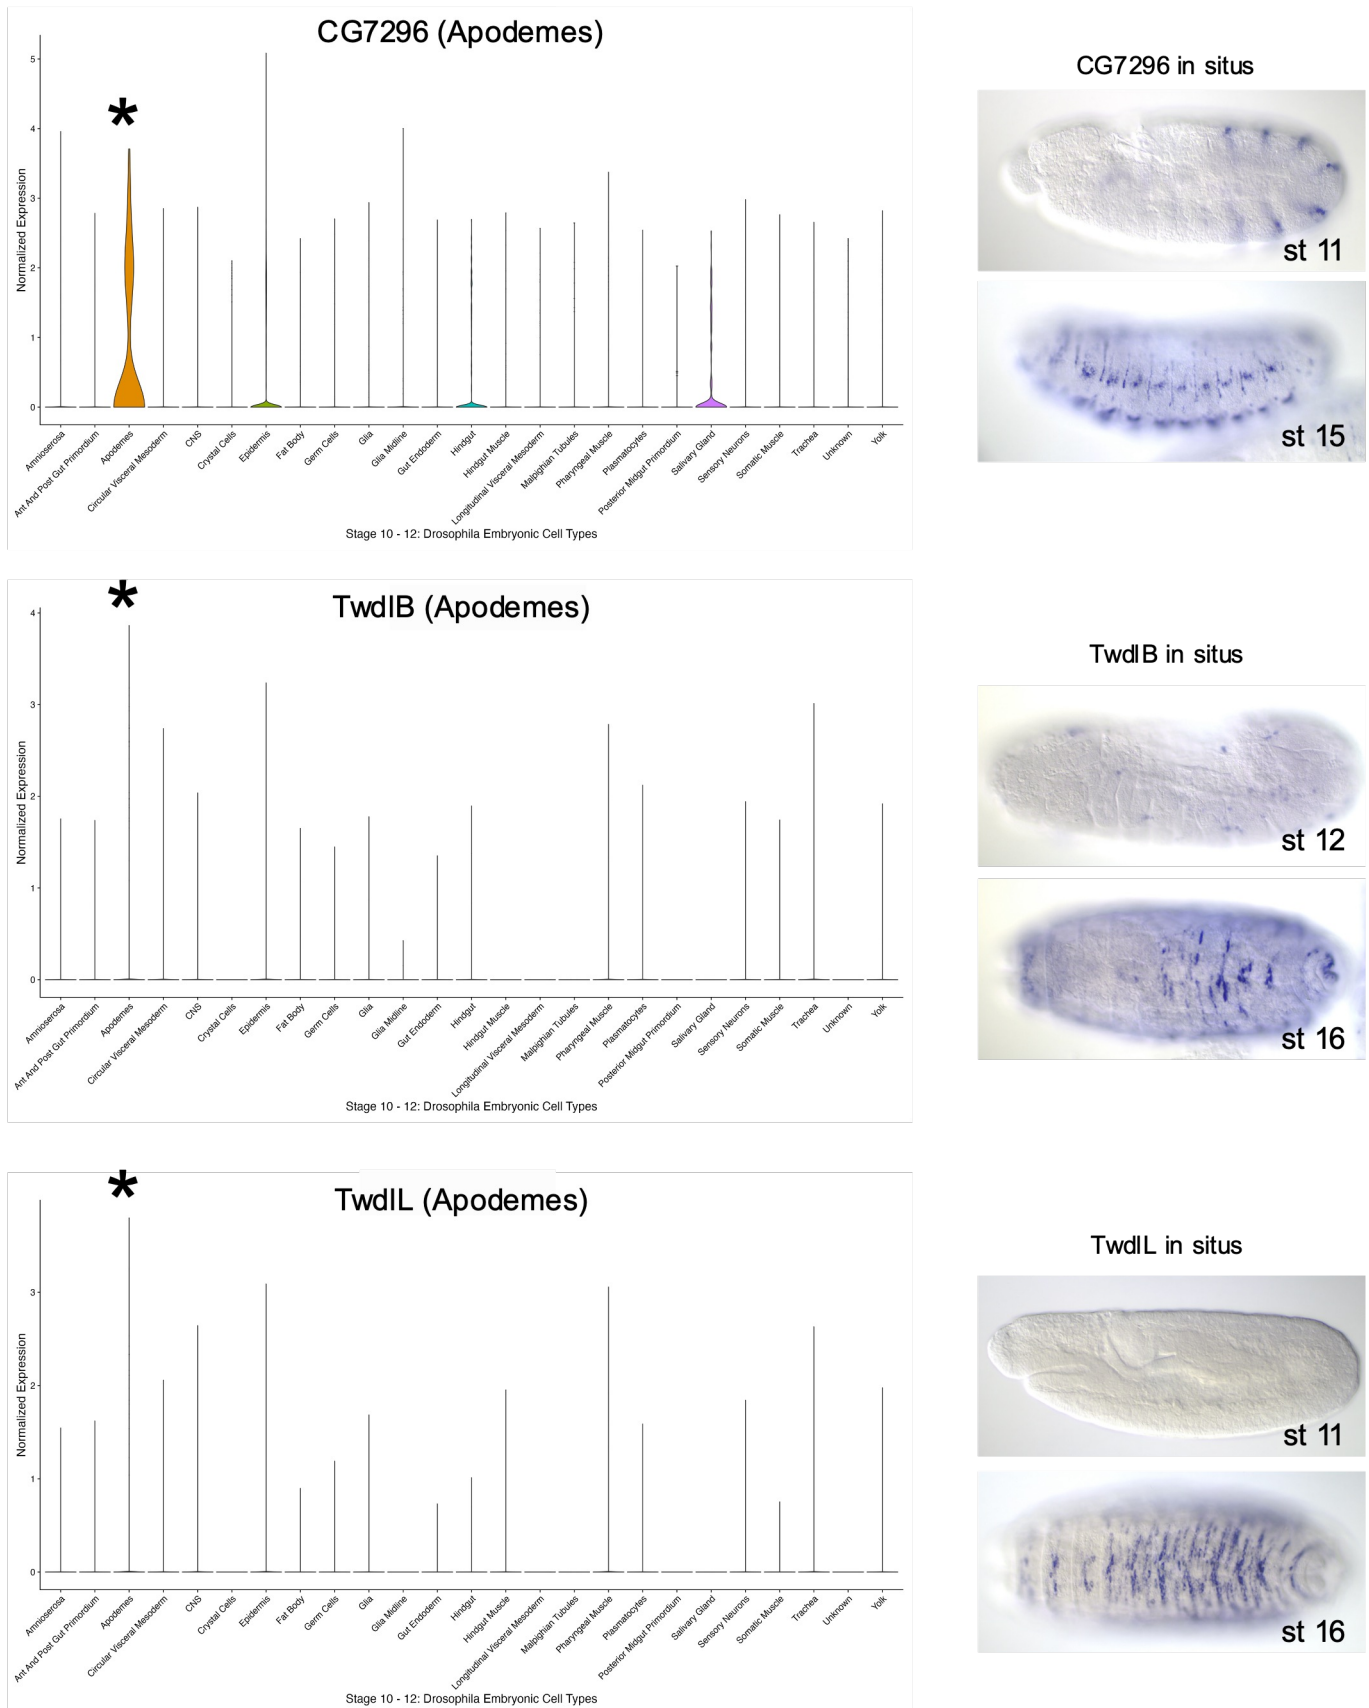

**Fig. S16.** Violin plots (on the left) and in-situ images from BDGP (on the right) of early apodemes marker genes: CG7296 (top), *TwdIB* (middle) and *TwdIL* (bottom).

## Early Cluster 27 Salivary Gland

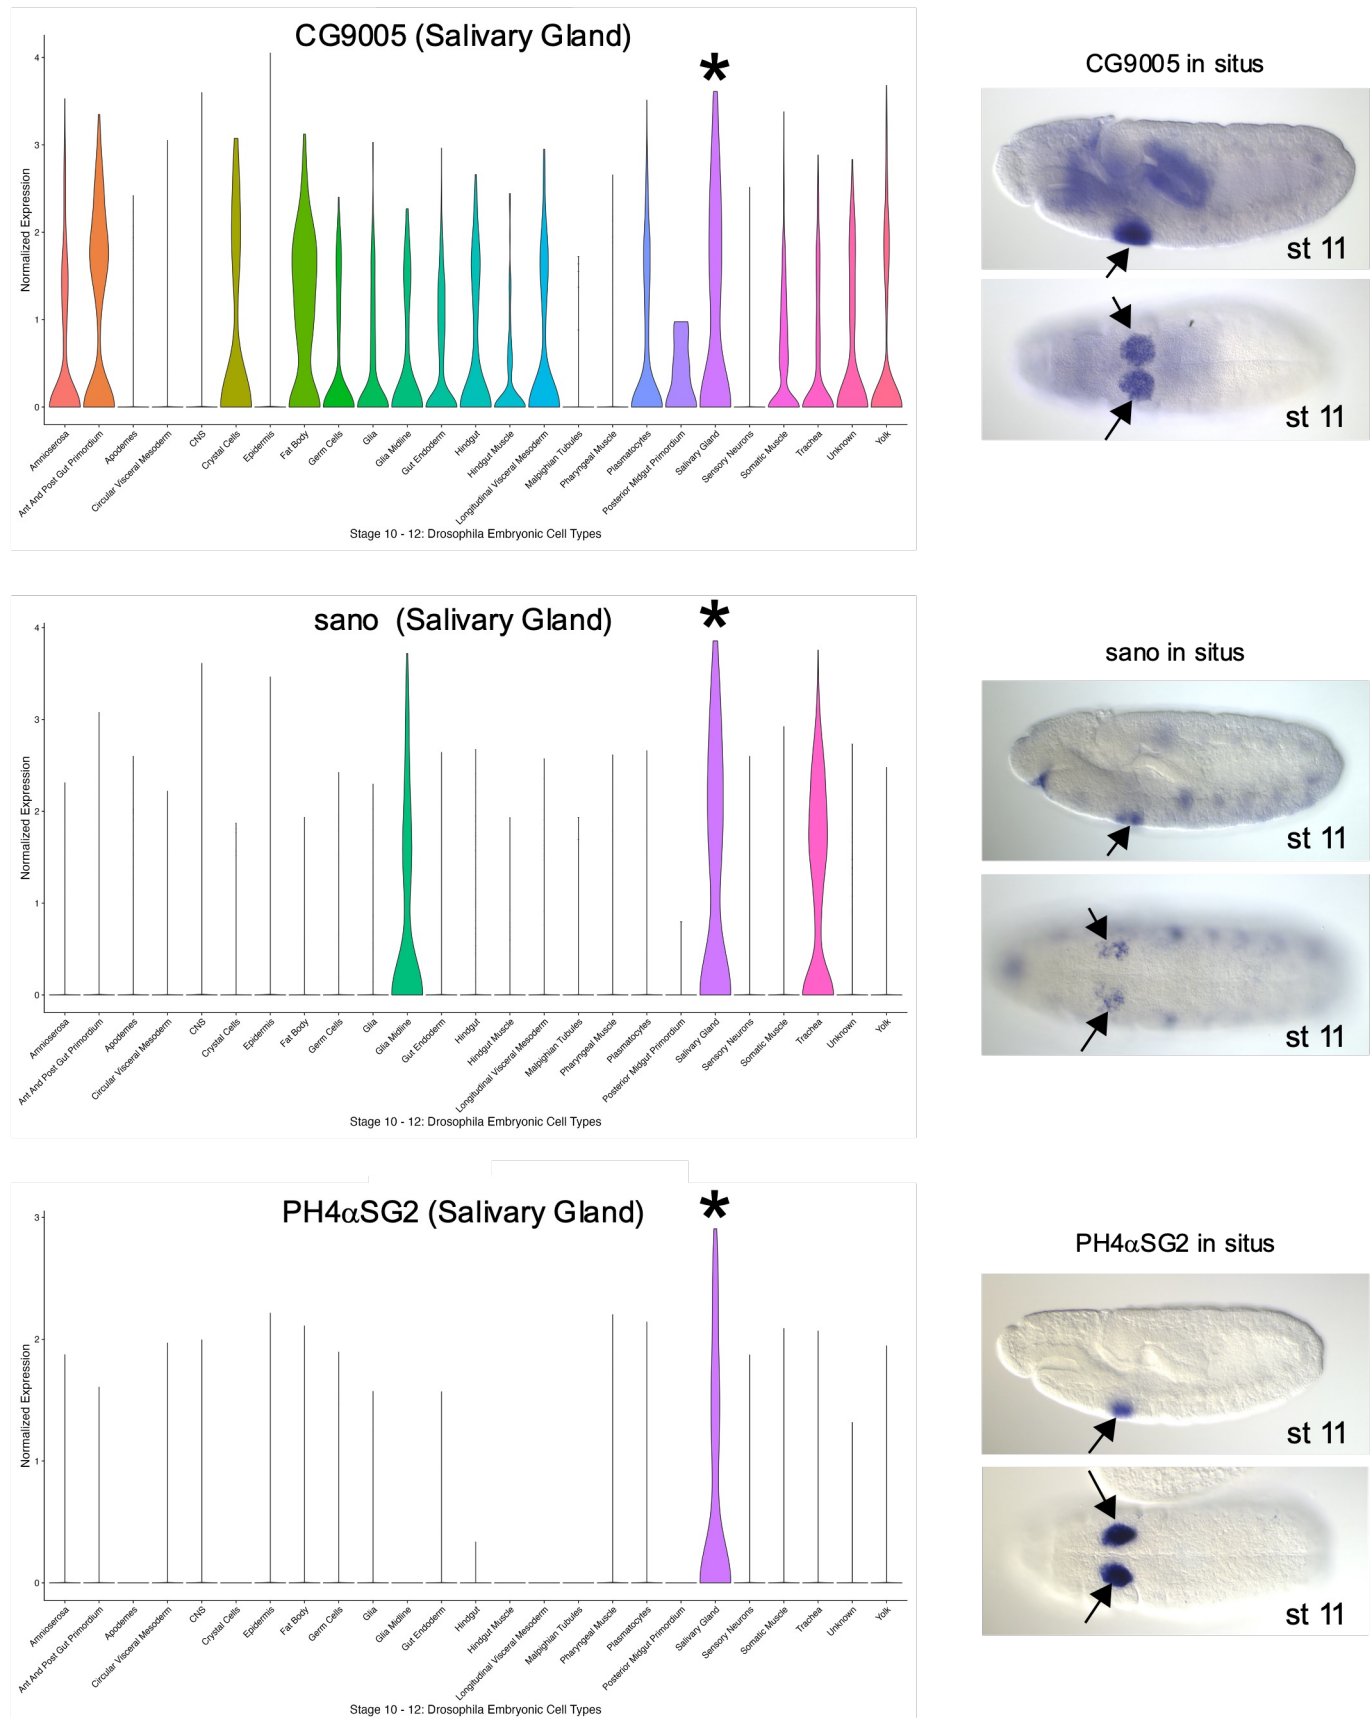

**Fig. S17.** Violin plots (on the left) and in-situ images from BDGP (on the right) of early SG marker genes: *CG9005* (top), *sano* (middle) and *PH4αSG2* (bottom).

## Early Cluster 33 Malpighian Tubules

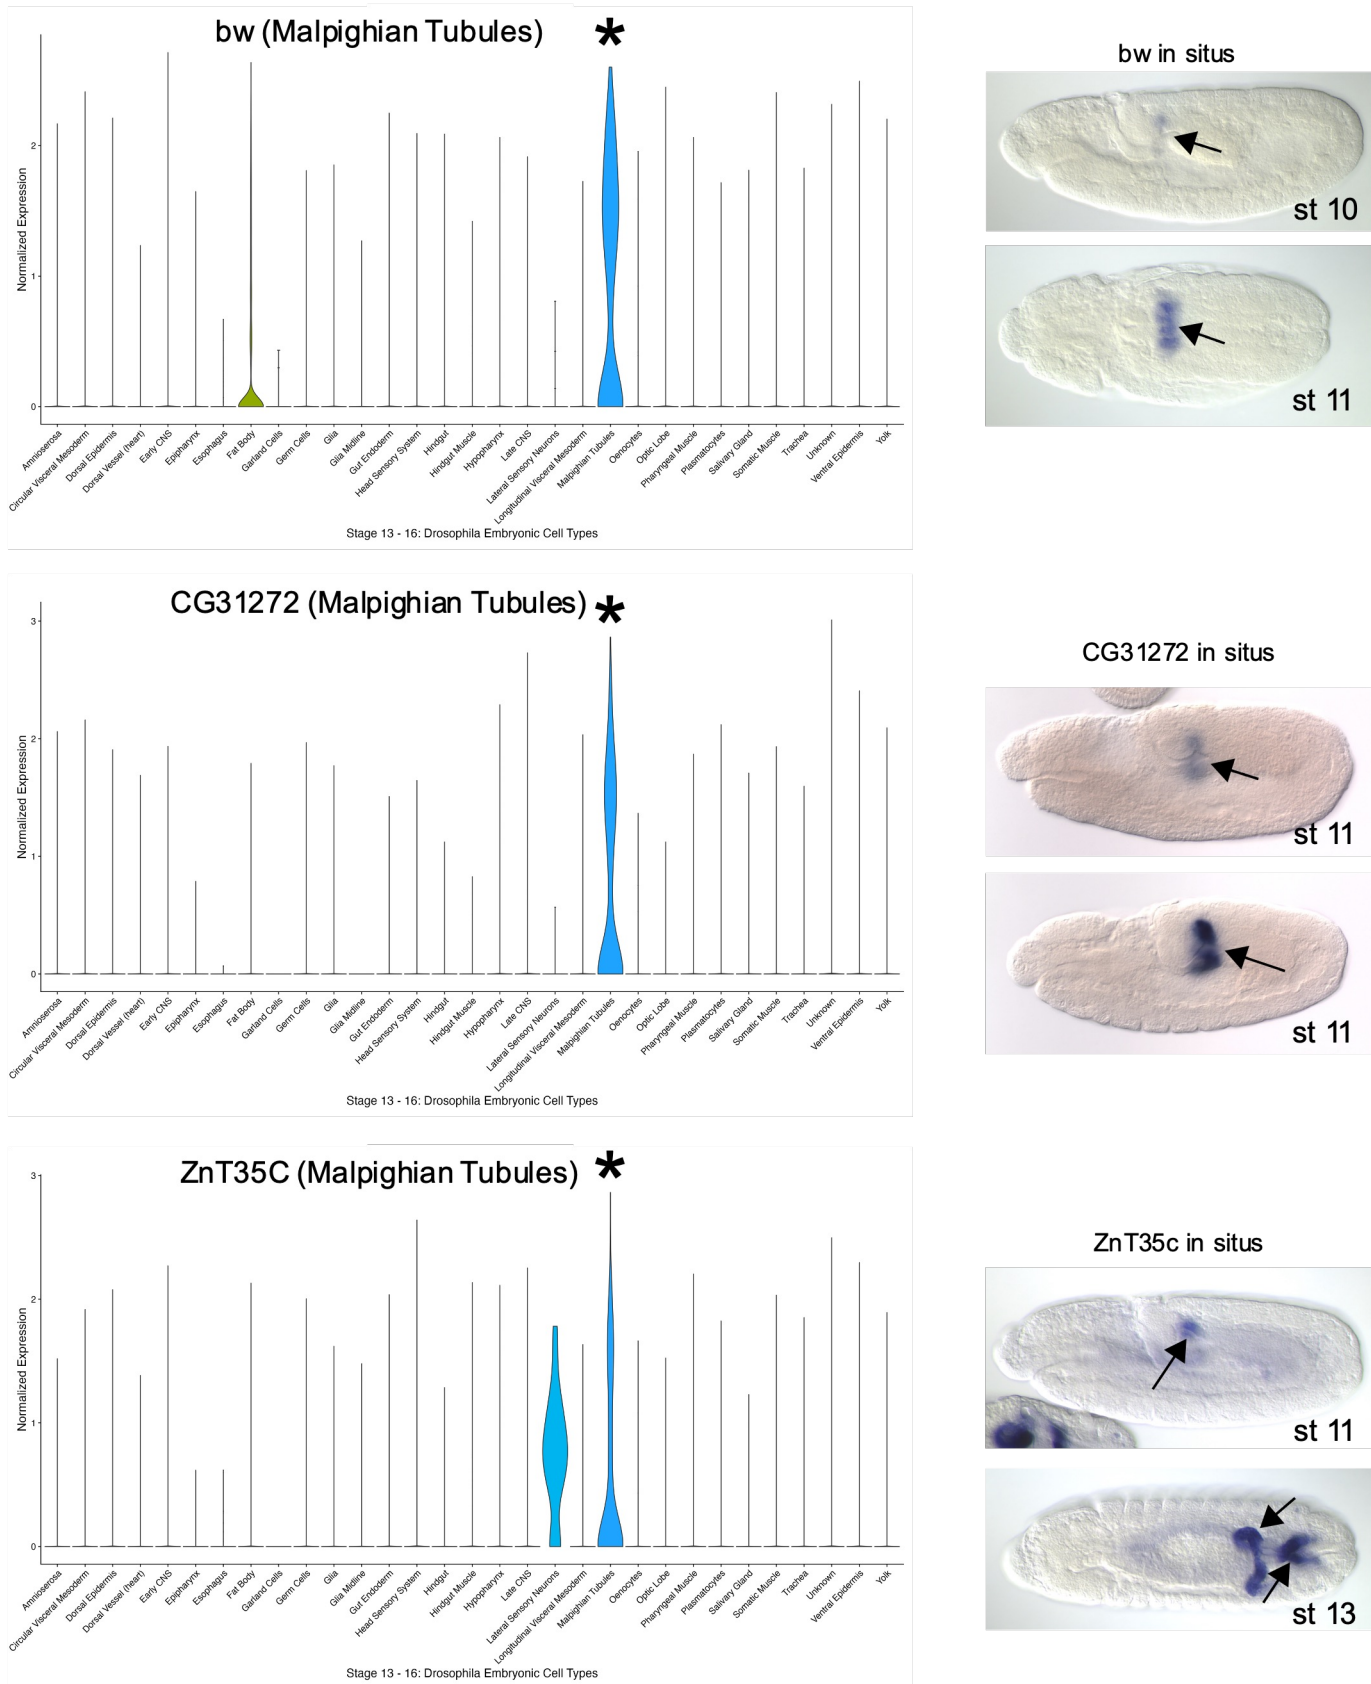

**Fig. S18.** Violin plots (on the left) and in-situ images from BDGP (on the right) of early Malpighian tubules marker genes: *bw* (top), *CG31272* (middle) and *ZnT35C* (bottom).



## Early Cluster 32 Crystal Cells

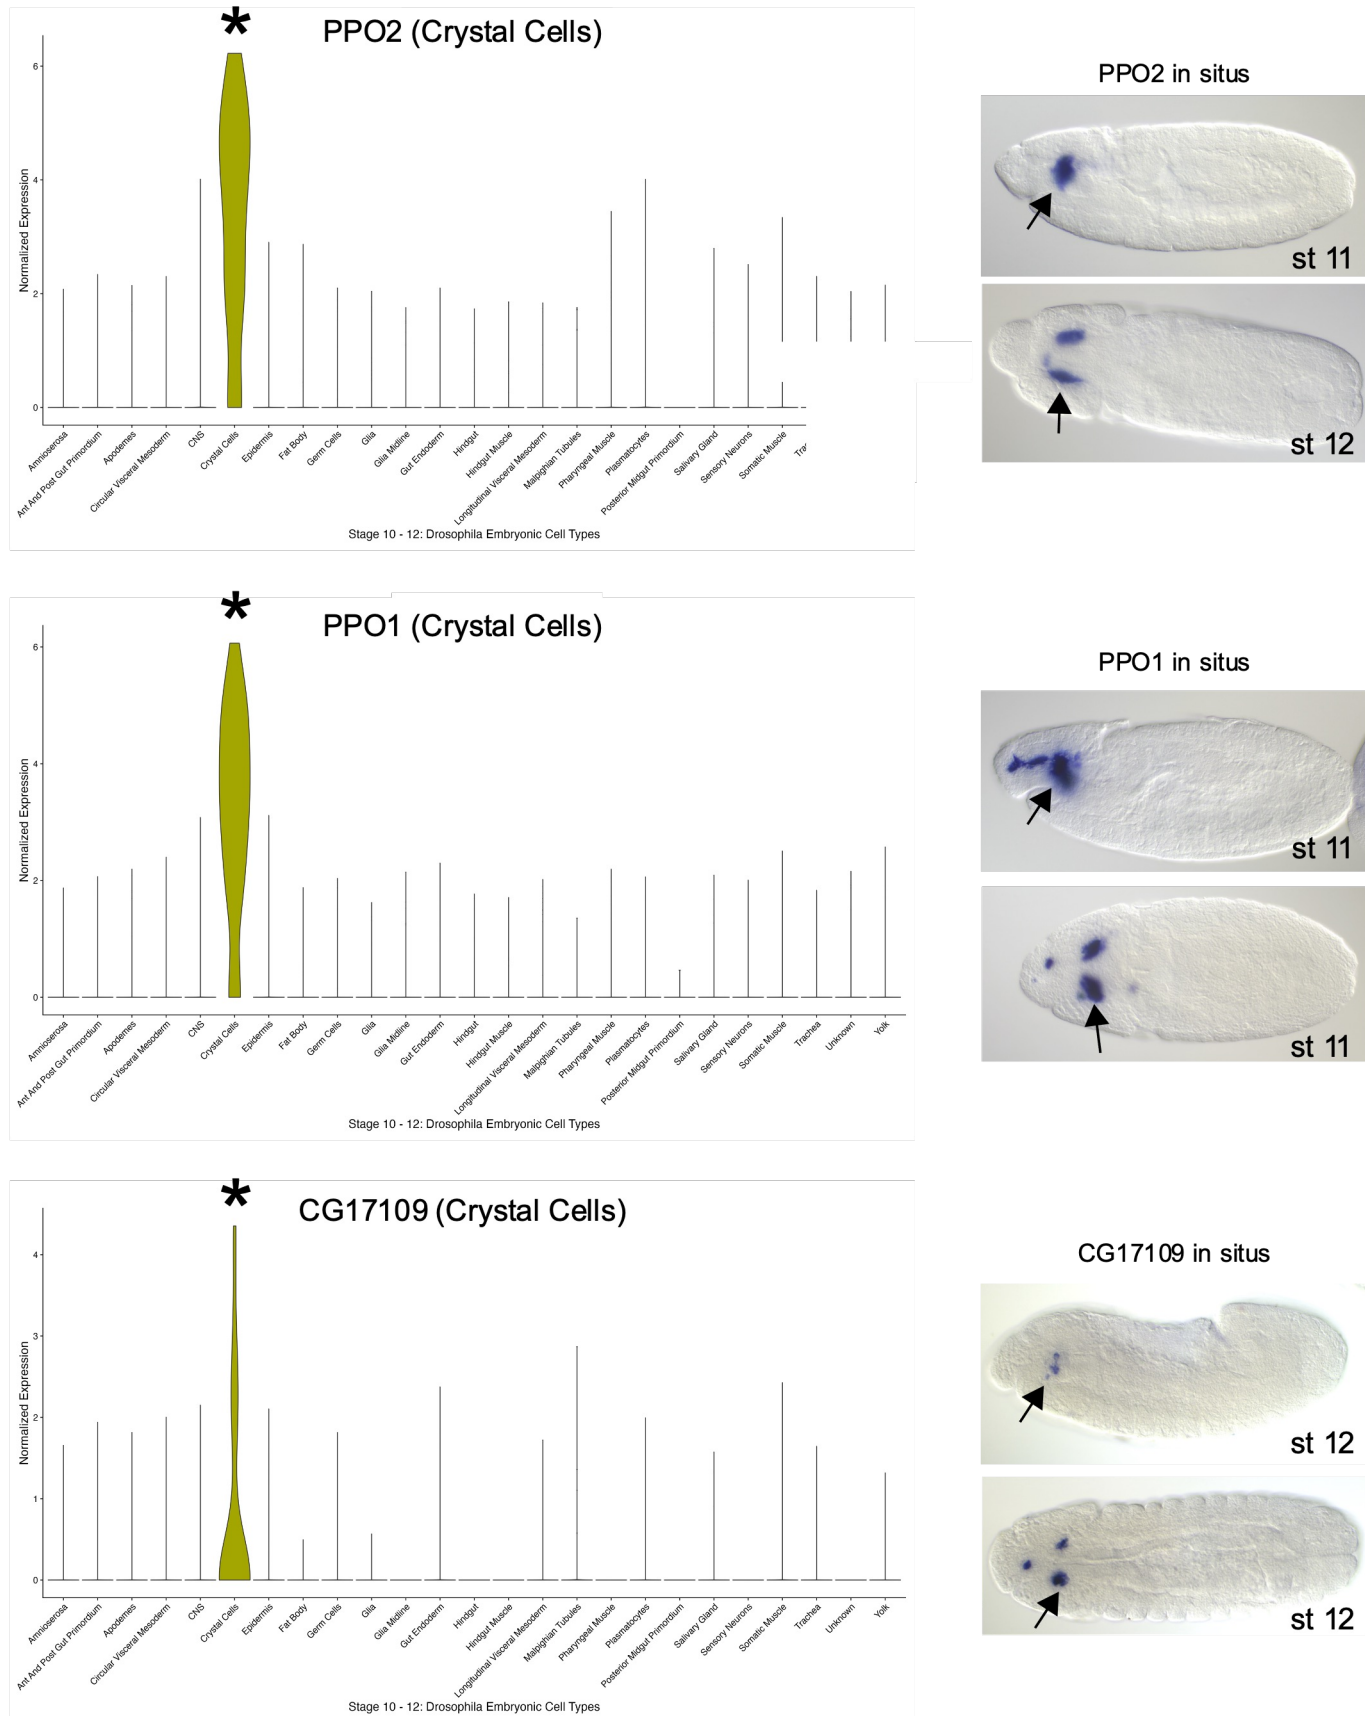

**Fig. S19.** Violin plots (on the left) and in-situ images from BDGP (on the right) of early crystal cells marker genes: *PPO2* (top), *PPO1* (middle) and *CG17109* (bottom).

## Late Cluster 20 Optic Lobe

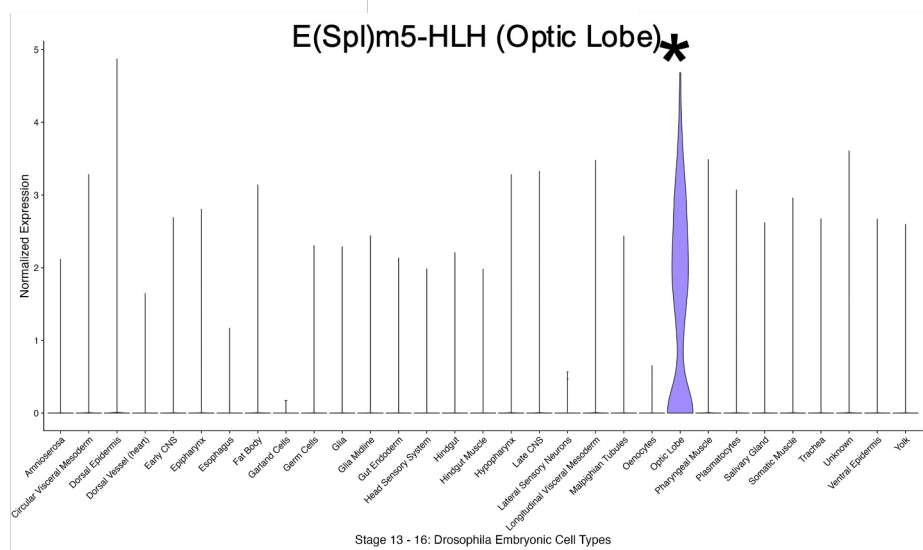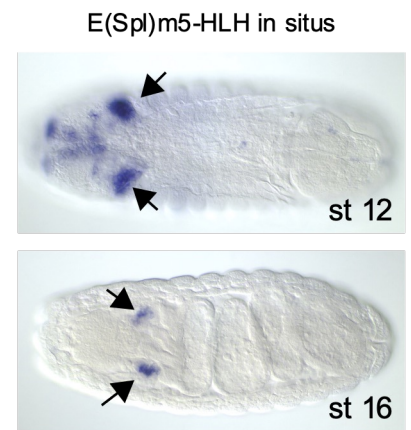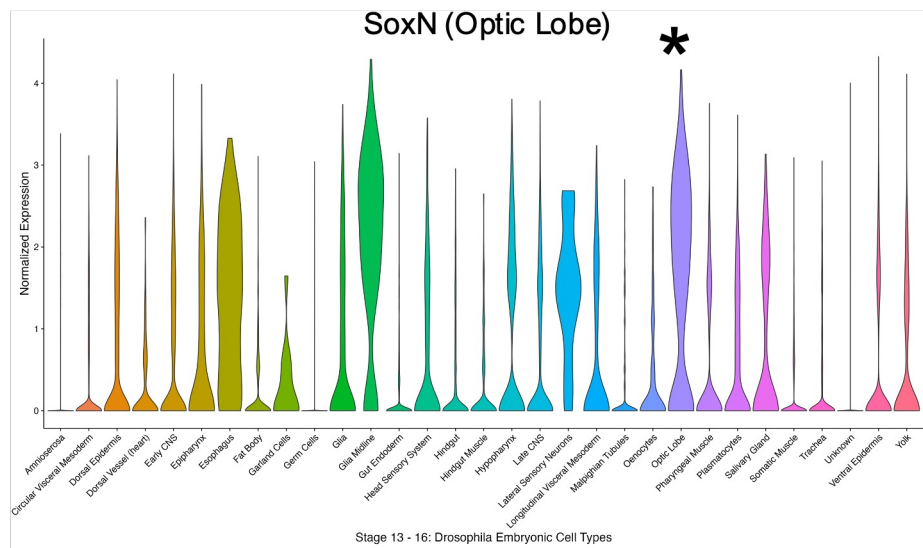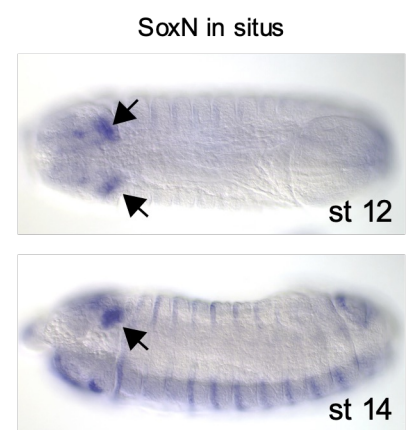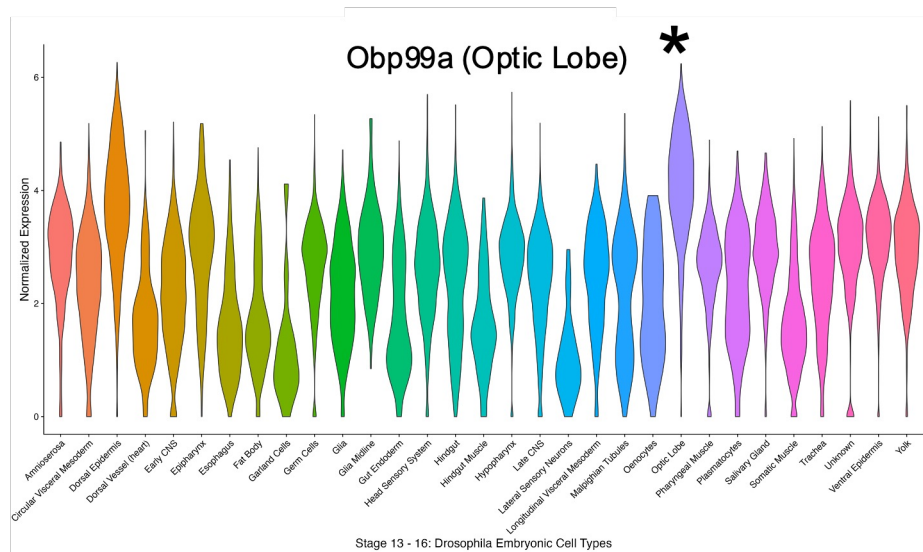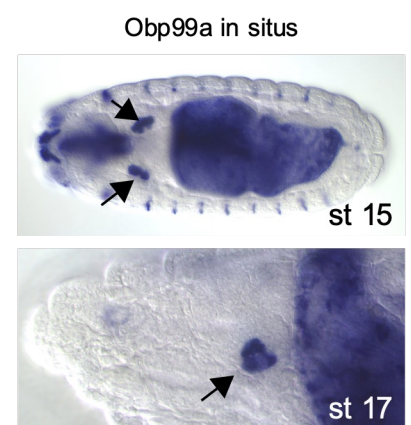

**Fig. S20.** Violin plots (on the left) and in-situ images from BDGP (on the right) of late optic lobe marker genes: *E(Spl)m5-HLH* (top), *SoxN* (middle) and *Obp99a* (bottom).

## Late Cluster 25 Salivary Gland

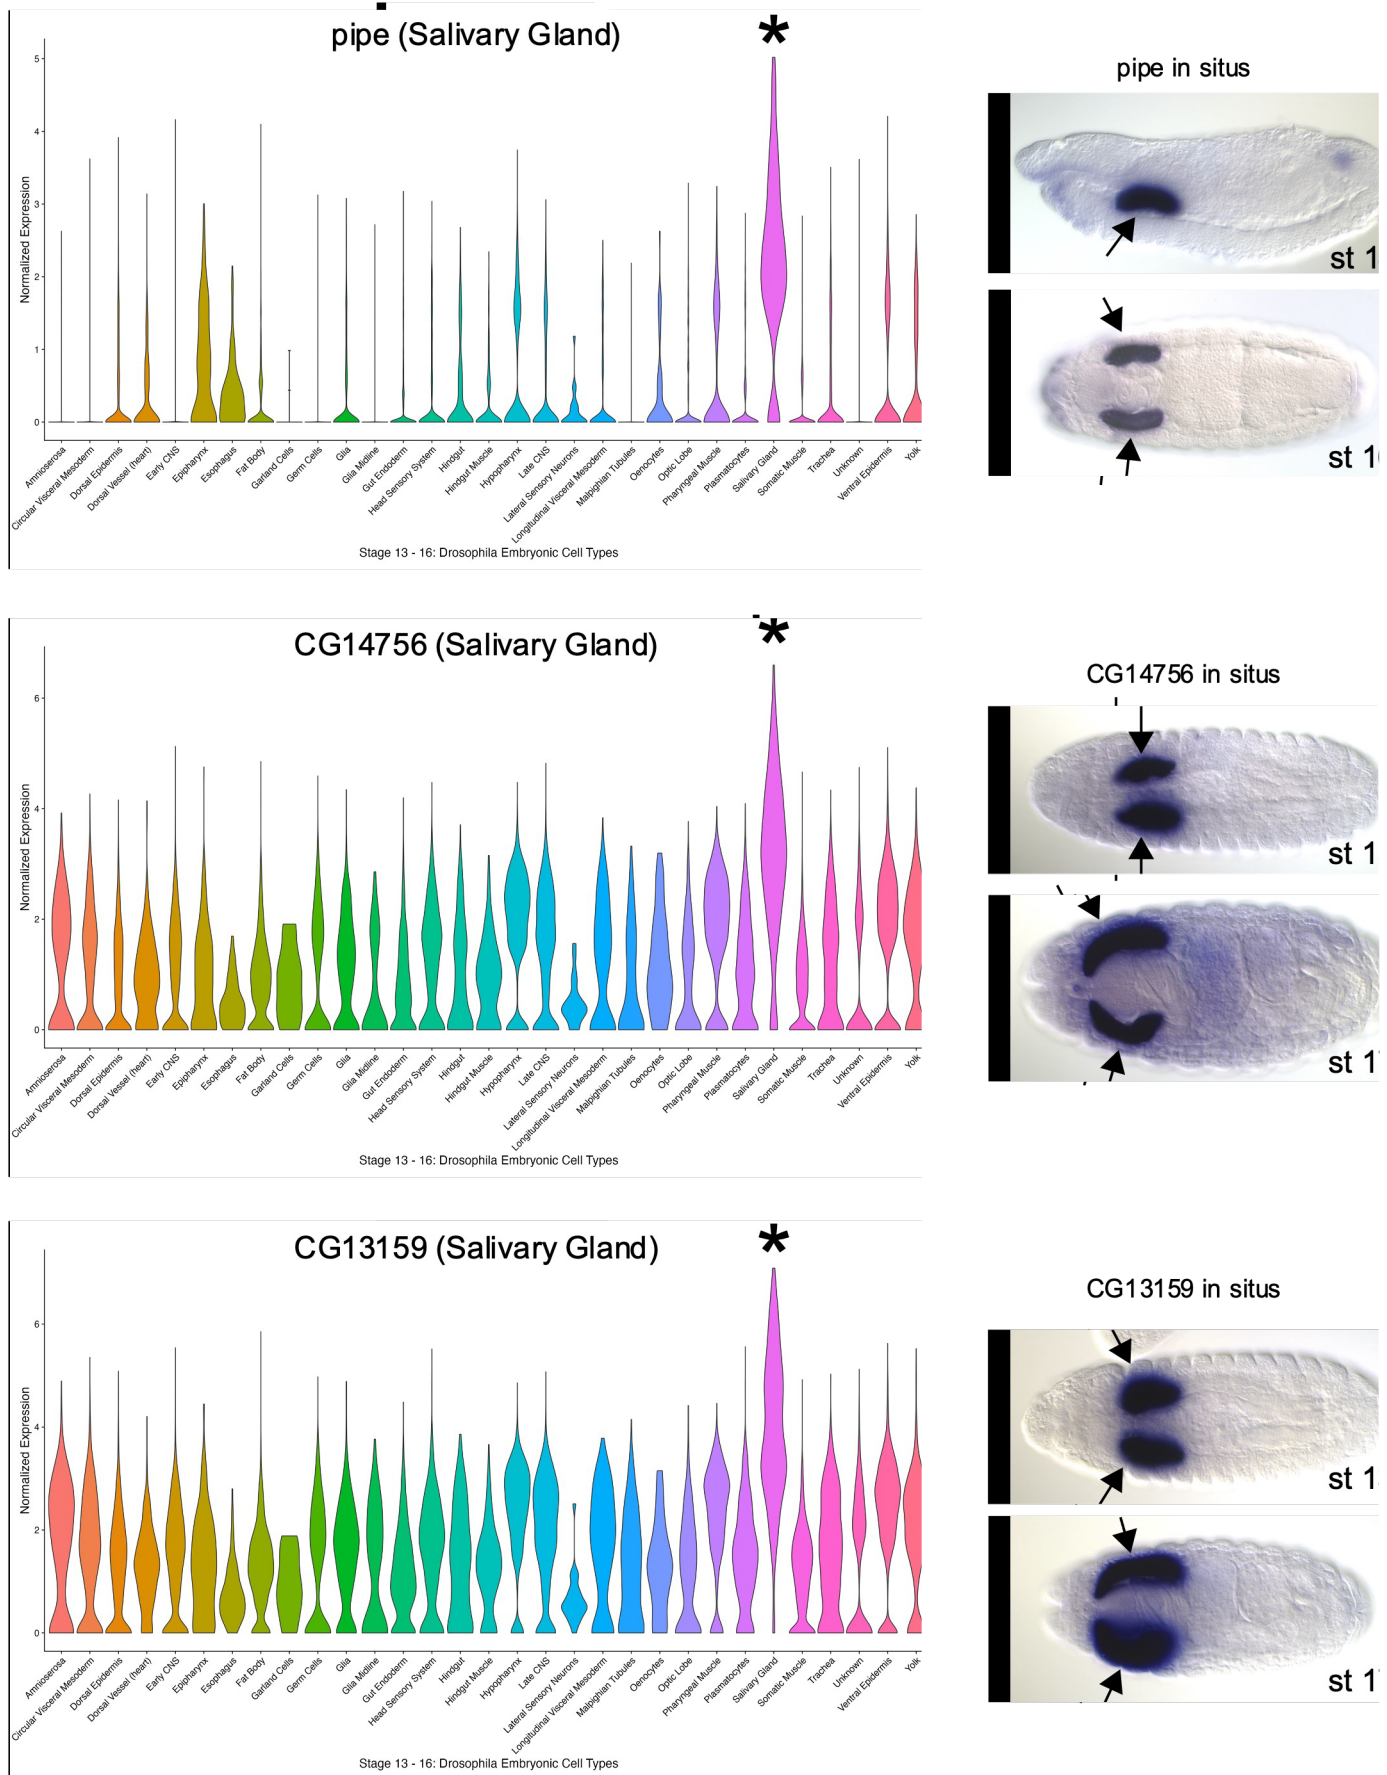

**Fig. S21.** Violin plots (on the left) and in-situ images from BDGP (on the right) of late SG marker genes: *pipe* (top), CG14756 (middle) and CG13159 (bottom).



## Late Cluster 27 Dorsal Vessel

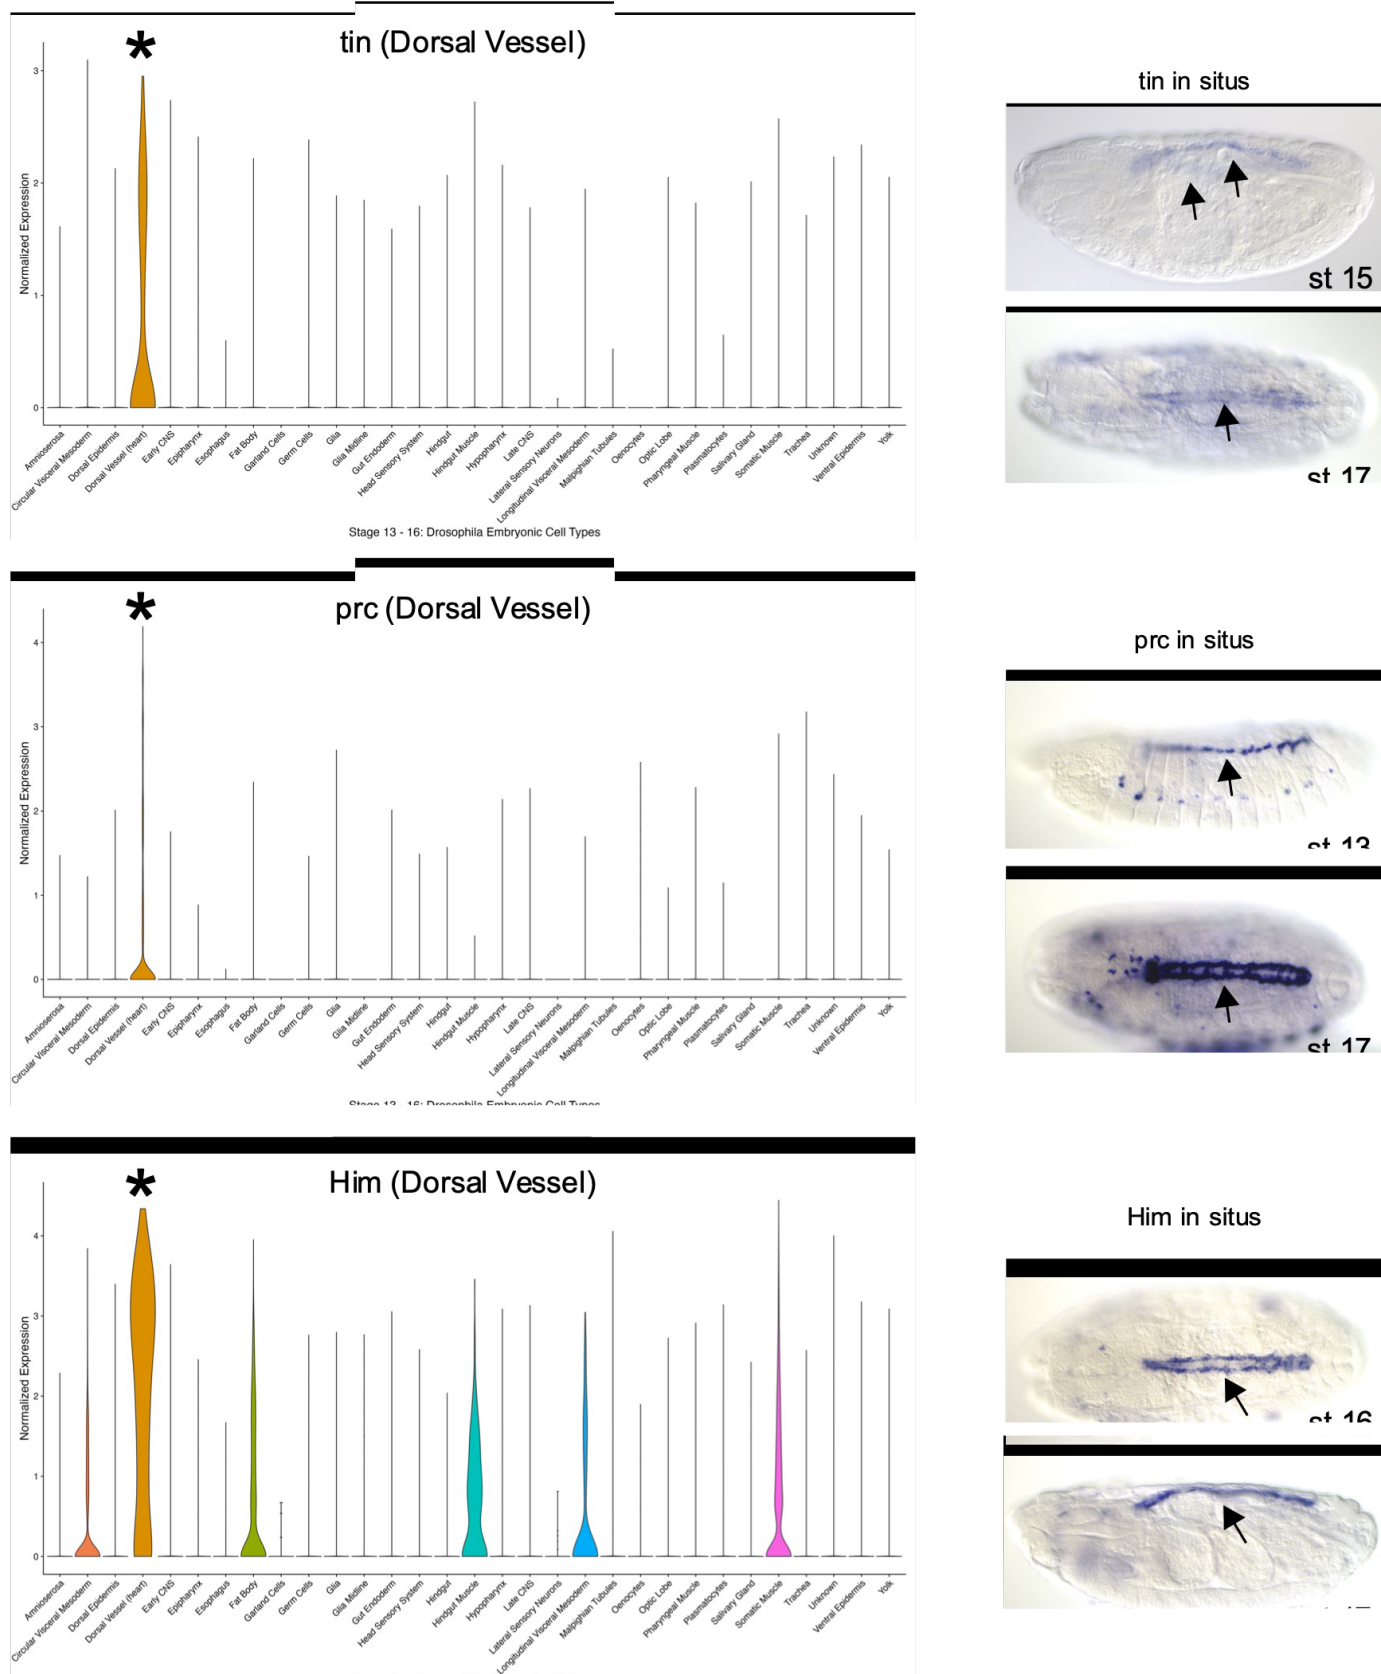

**Fig. S22.** Violin plots (on the left) and in-situ images from BDGP (on the right) of late dorsal vessel marker genes: *tin* (top), *prc* (middle) and *Him* (bottom).



## Late Cluster 29 Malpighian Tubules

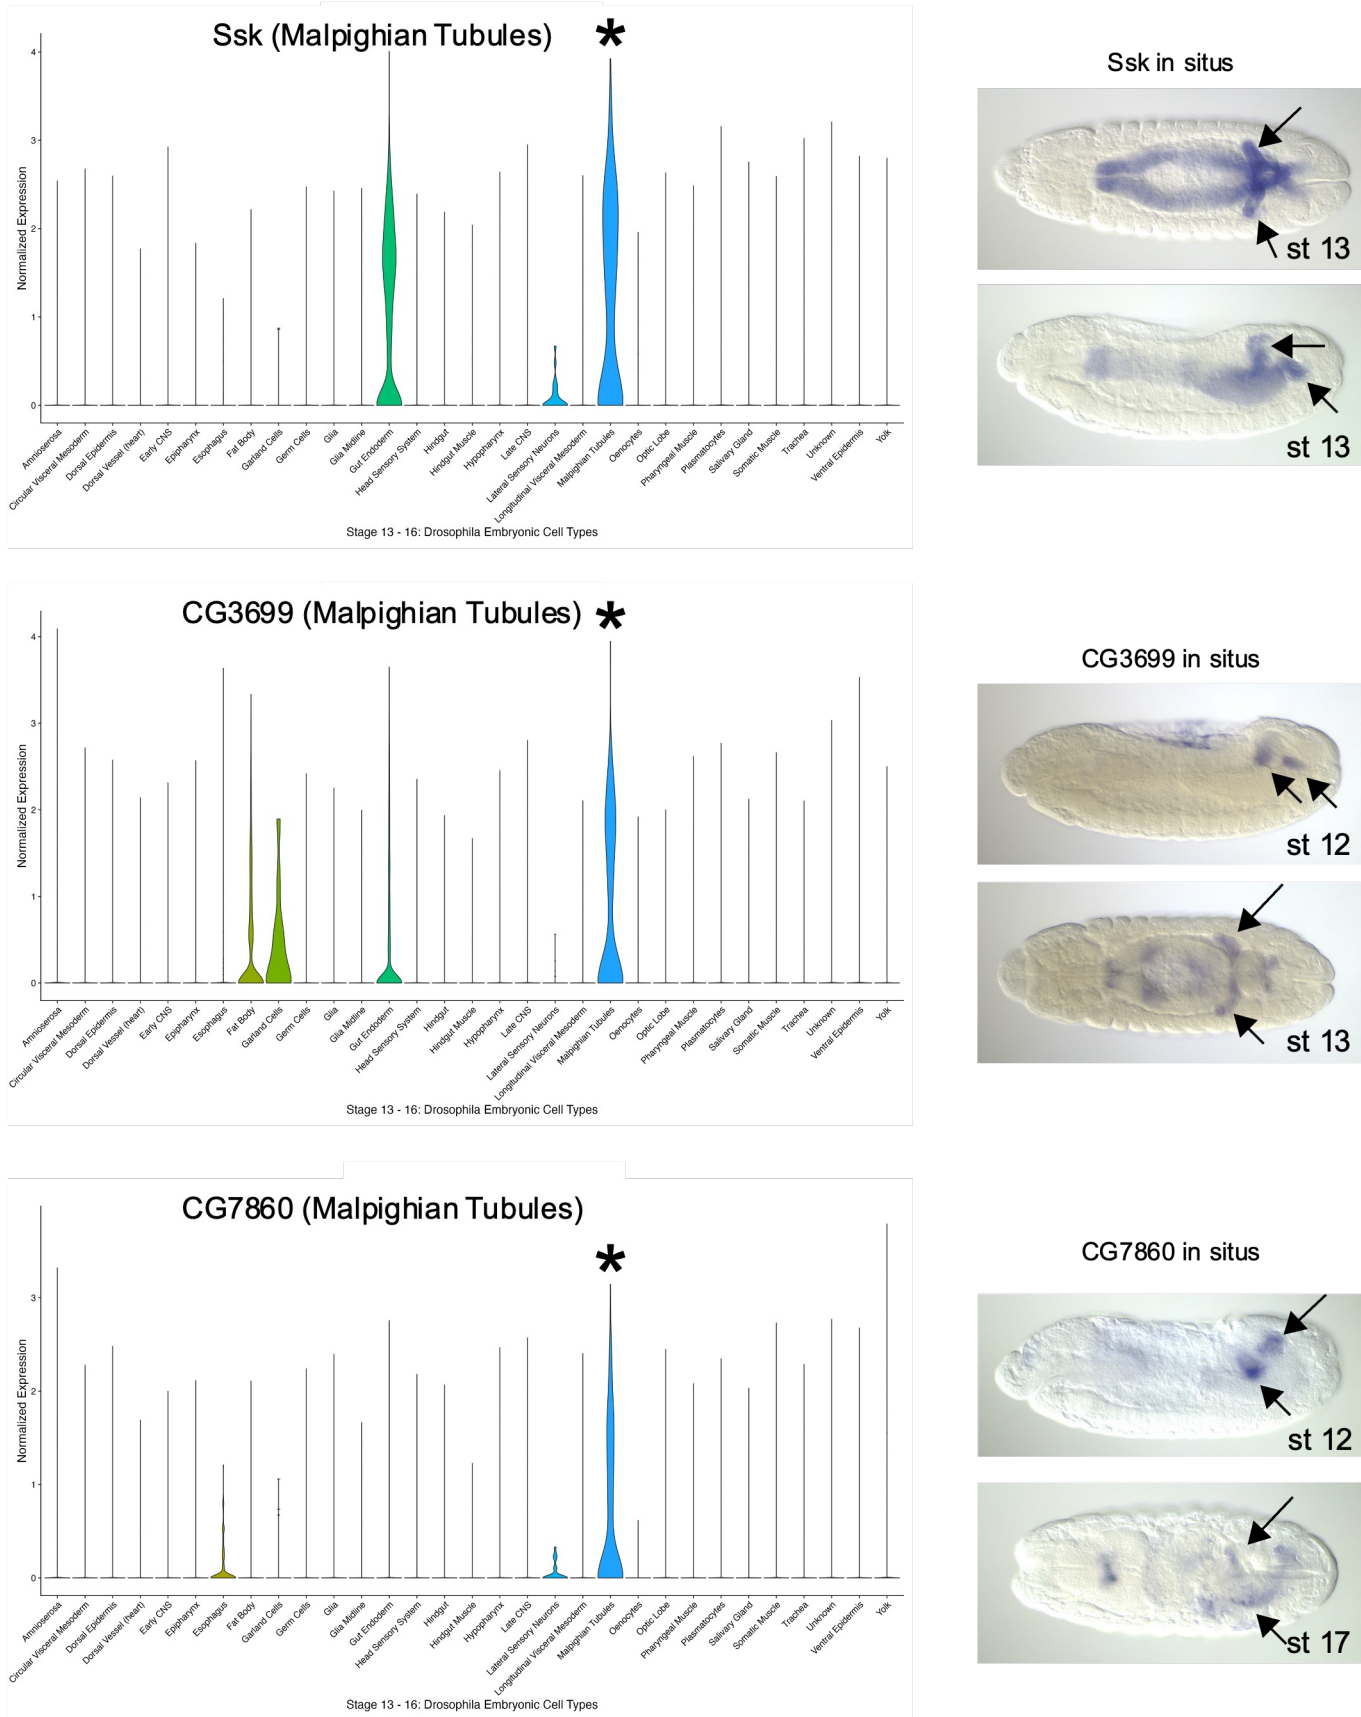

**Fig. S23.** Violin plots (on the left) and in-situ images from BDGP (on the right) of late Malpighian tubules marker genes: *Ssk* (top), *CG3699* (middle) and *CG7860* (bottom).

## Late Cluster 32 Oenocytes

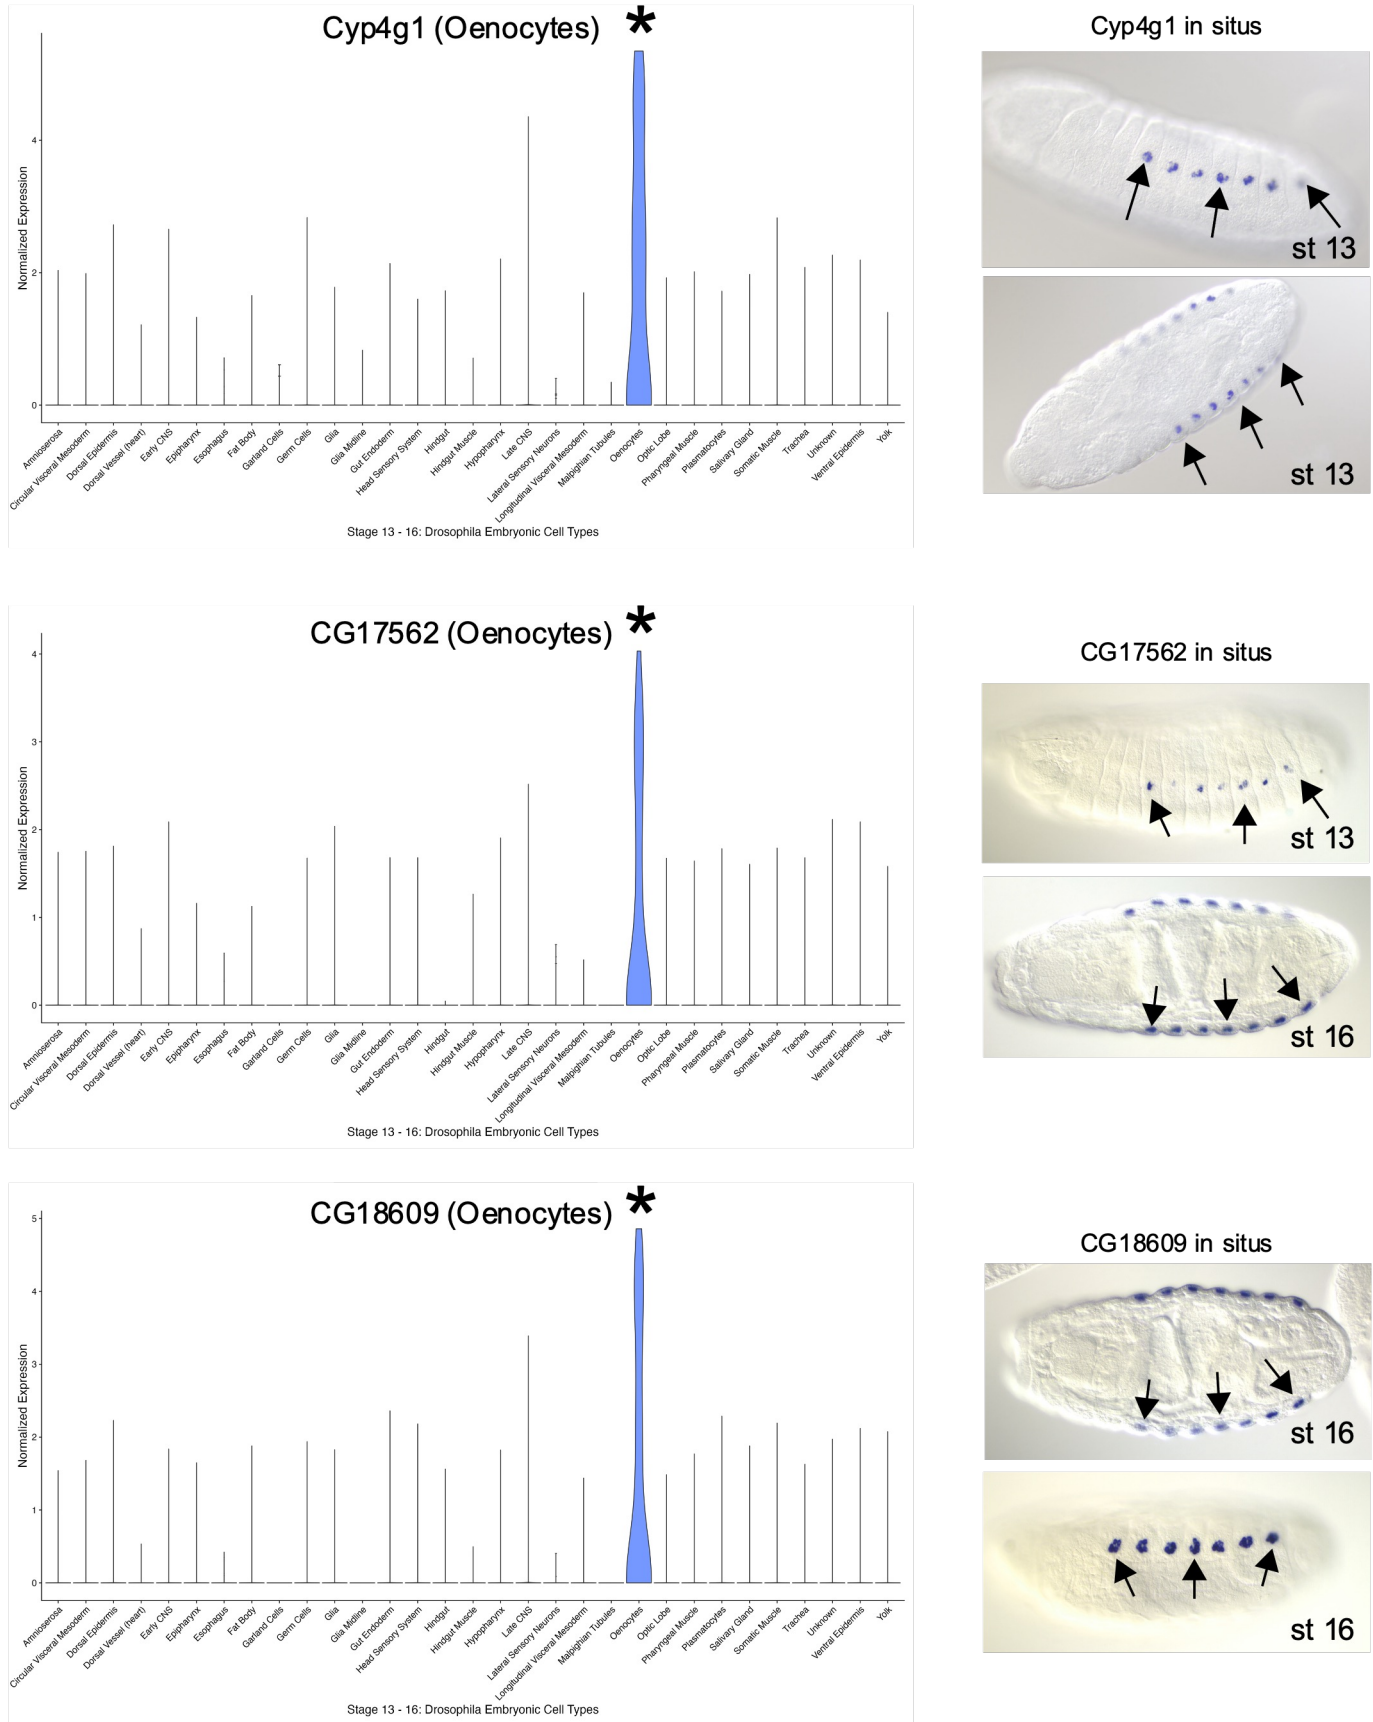

**Fig. S24.** Violin plots (on the left) and in-situ images from BDGP (on the right) of late oenocytes marker genes: *Cyp4g1* (top), *CG17562* (middle) and *CG18609* (bottom).

## Late Cluster 35 Garland Cells

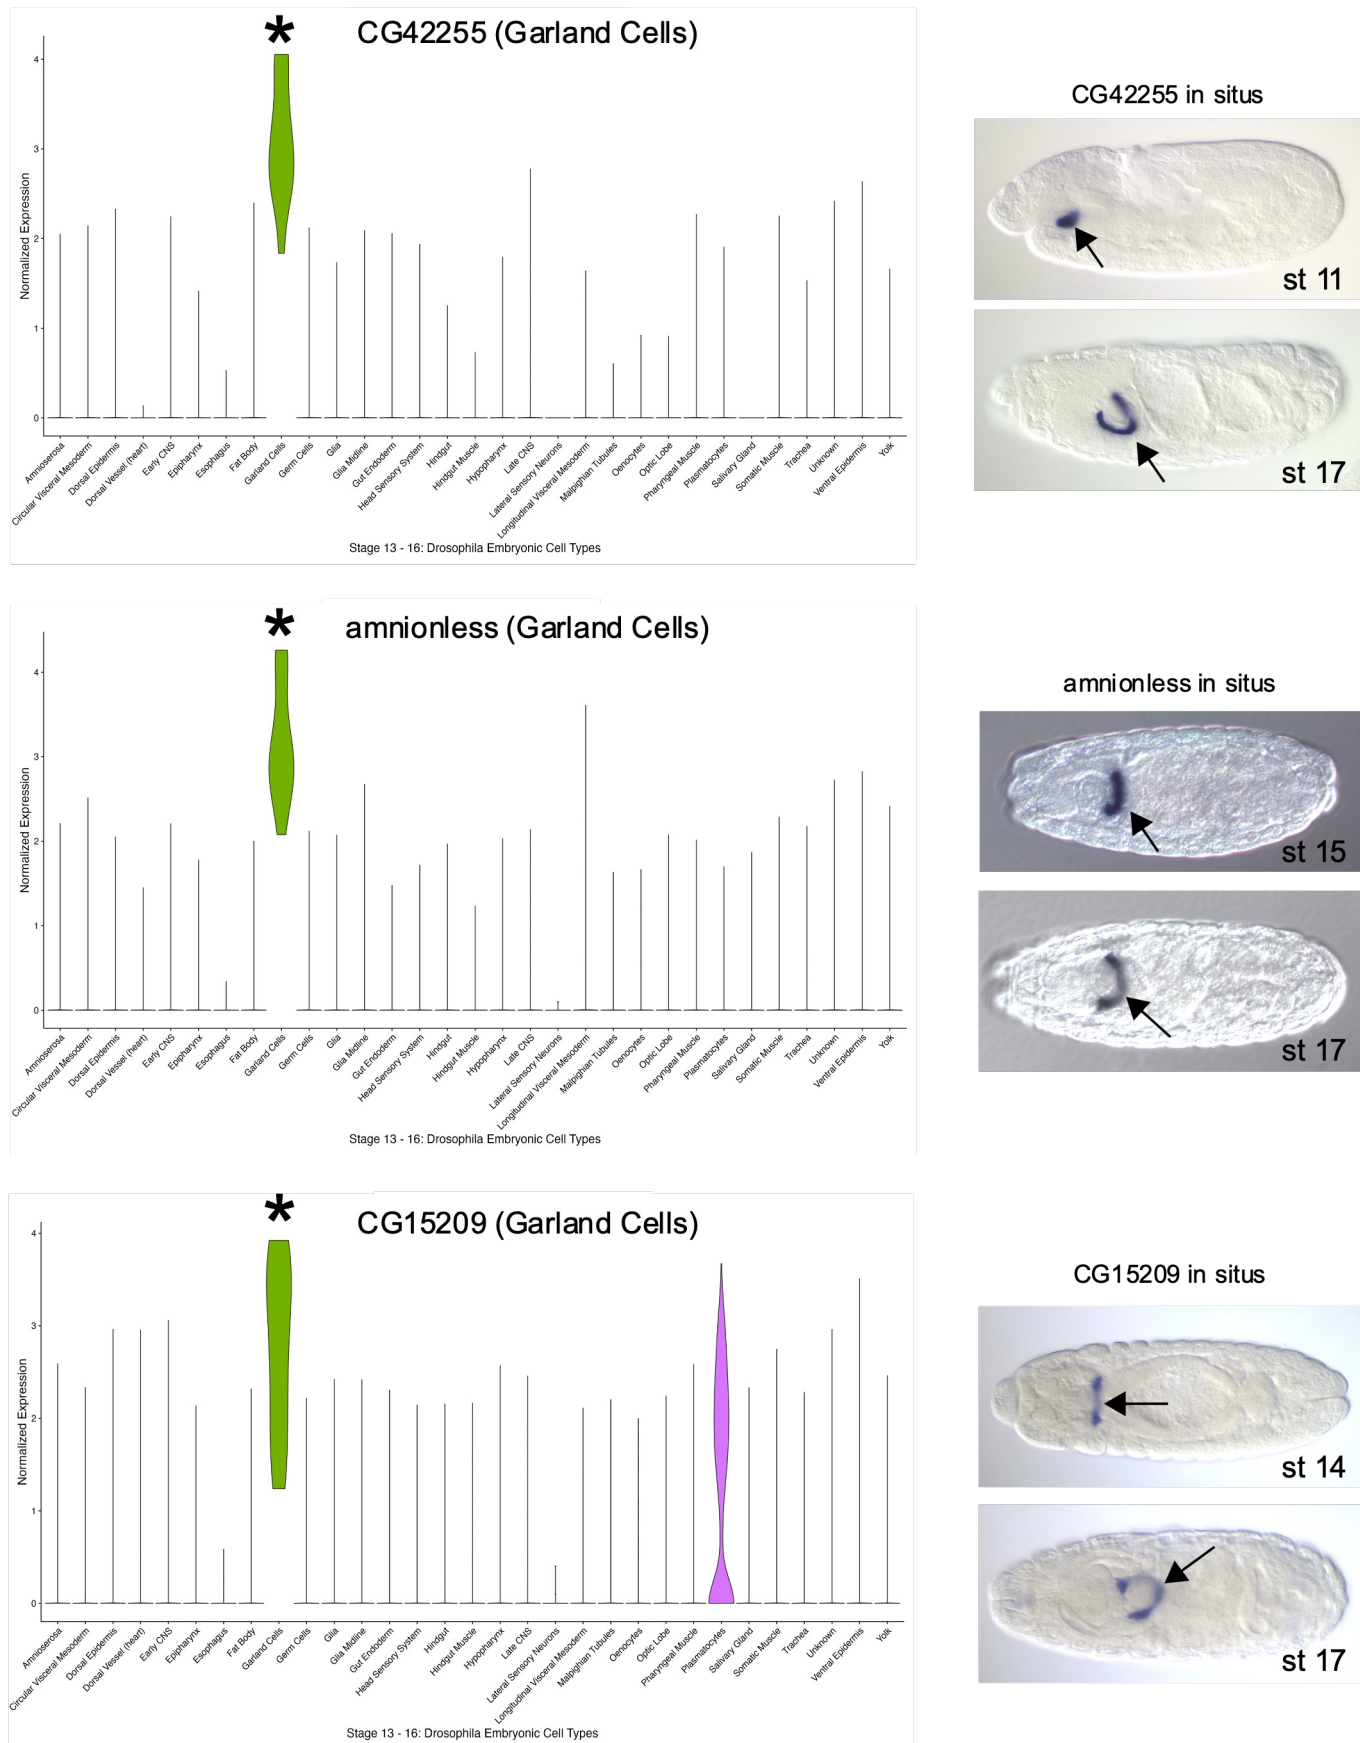

**Fig. S25.** Violin plots (on the left) and in-situ images from BDGP (on the right) of late garland cells marker genes: CG42255 (top), *amnionless* (middle) and CG15209 (bottom).

## Late Cluster 28 Epipharynx

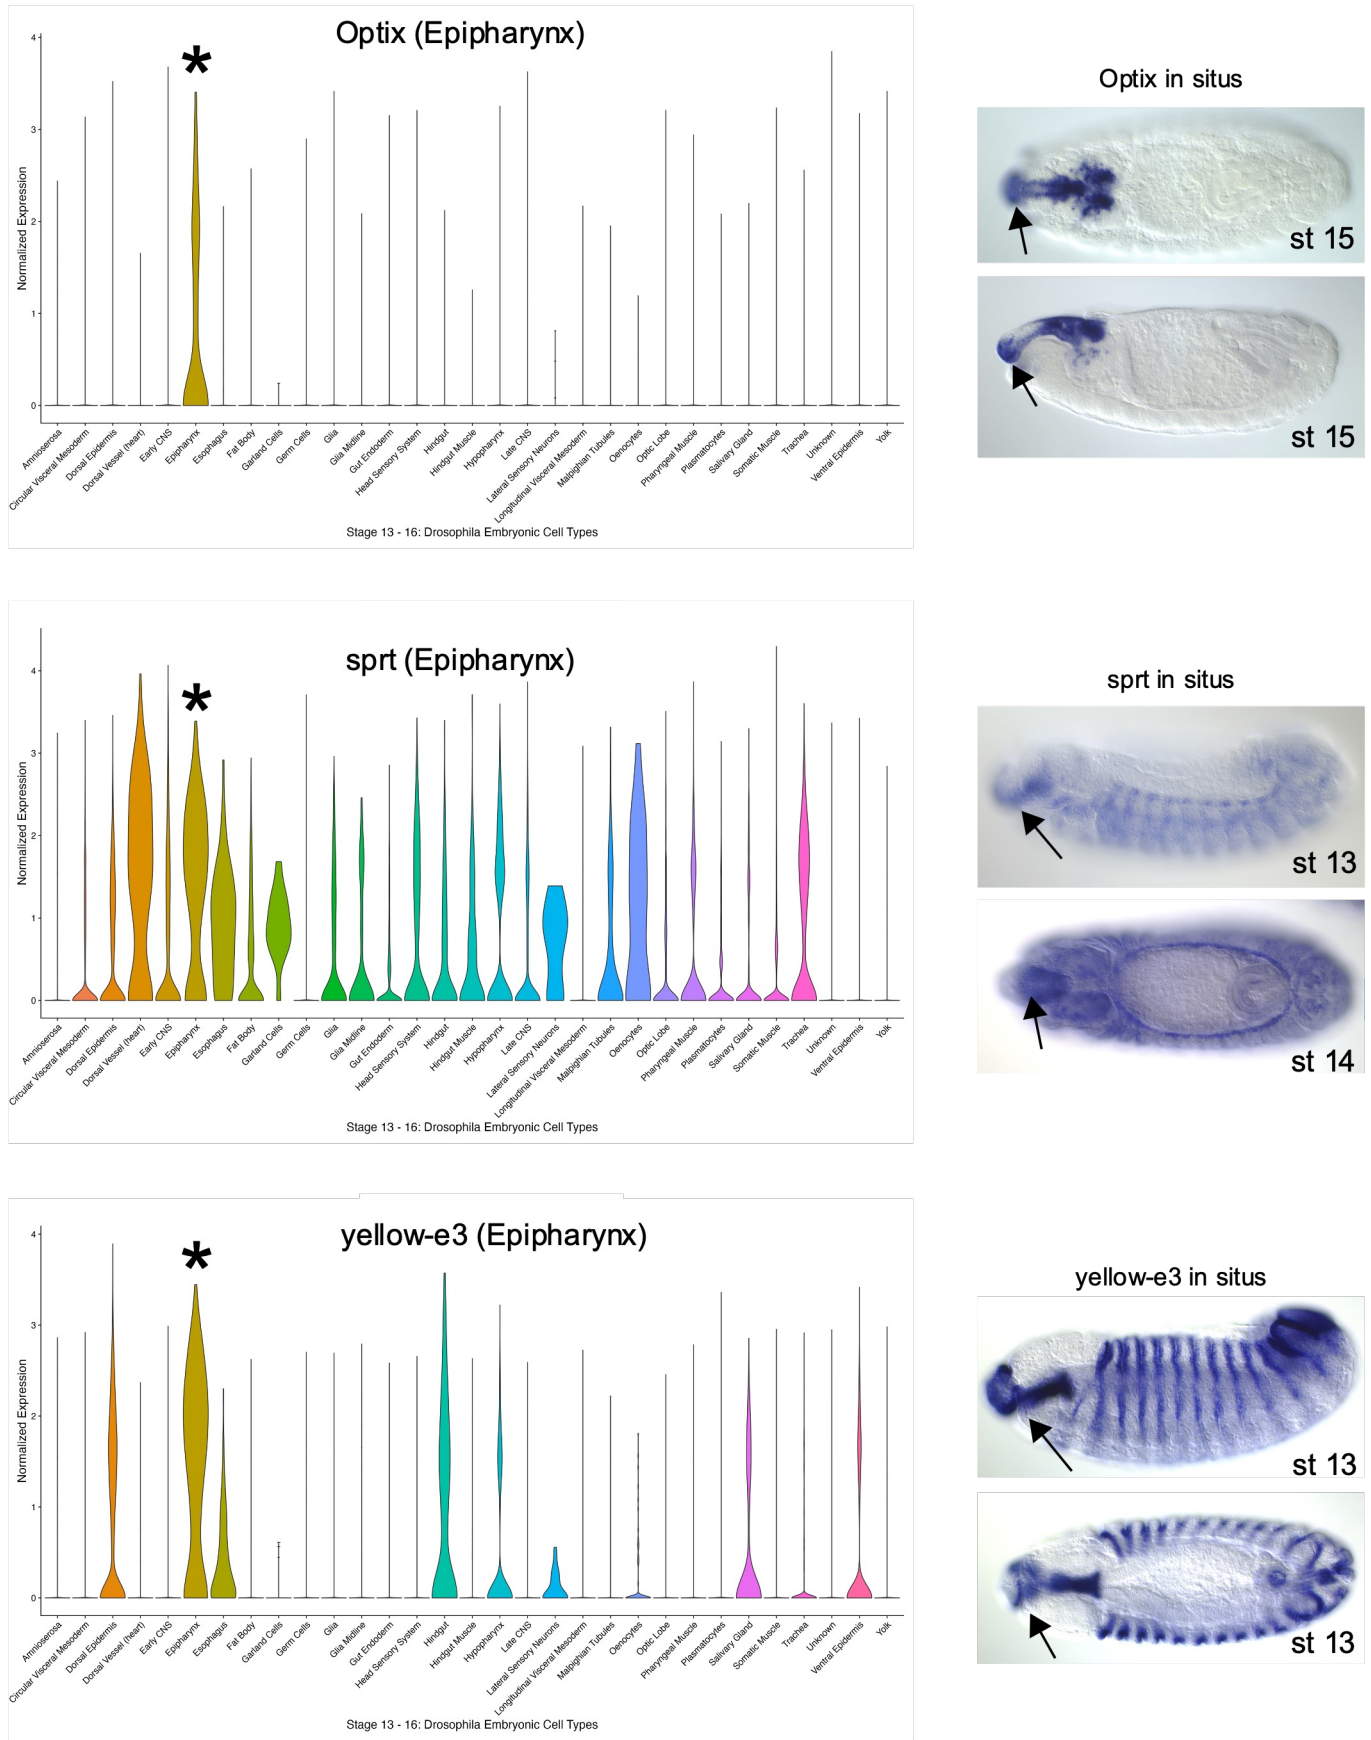

**Fig. S26.** Violin plots (on the left) and in-situ images from BDGP (on the right) of late epipharynx marker genes: *Optix* (top), *spt* (middle) and *yellow-e3* (bottom).



## Late Cluster 30 Esophagus

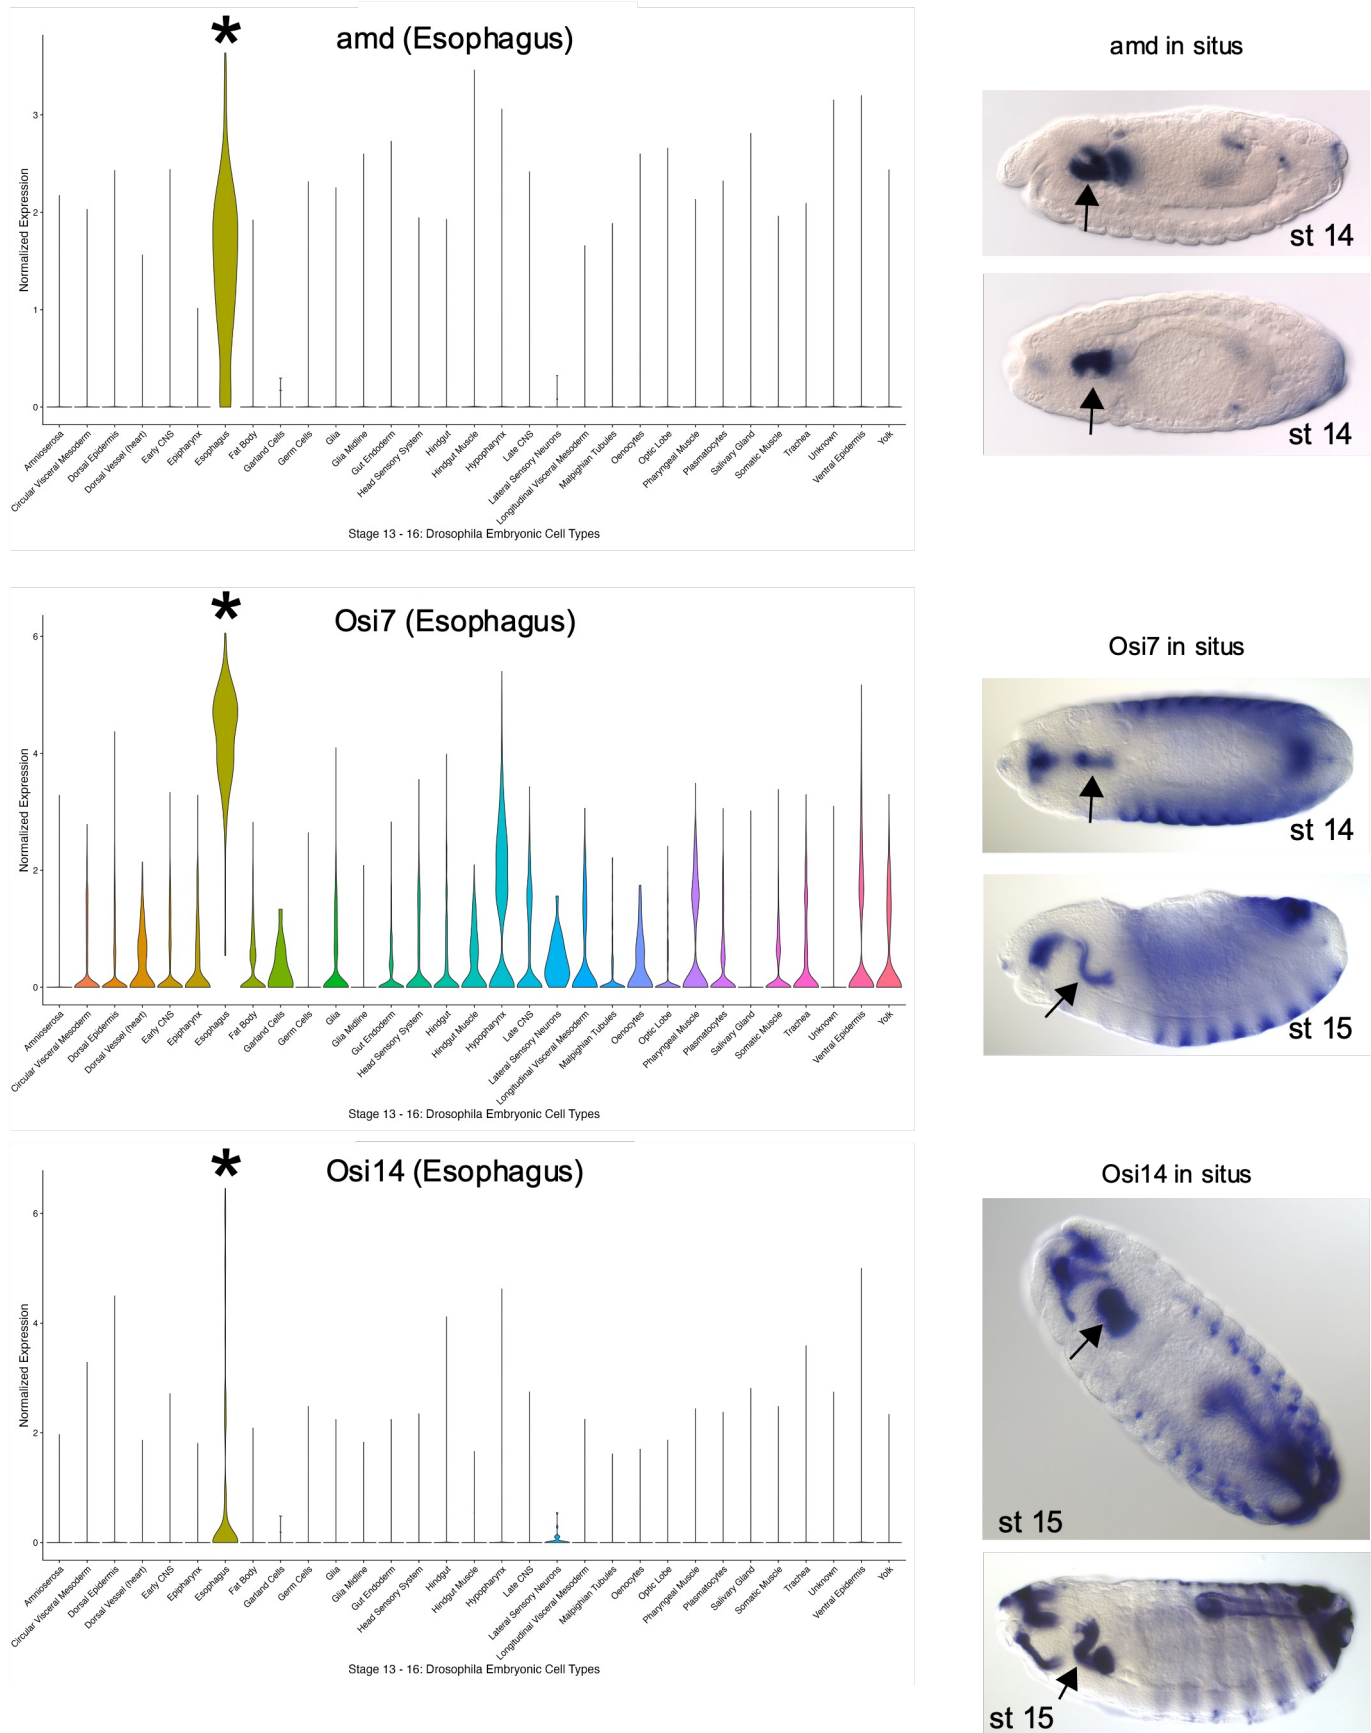

**Fig. S27.** Violin plots (on the left) and in-situ images from BDGP (on the right) of late esophagus marker genes: *amd* (top), *Osi7* (middle) and *Osi14* (bottom).

## Late Cluster 7 Hypopharynx

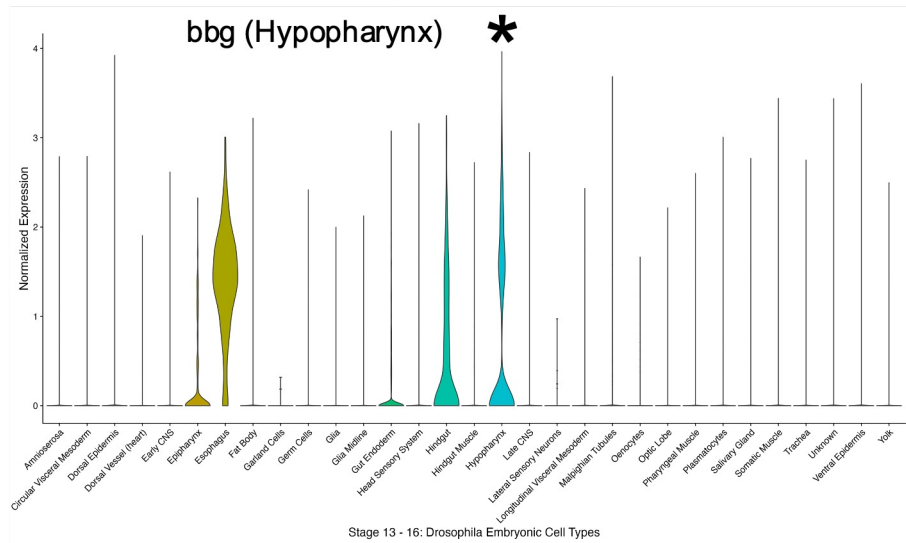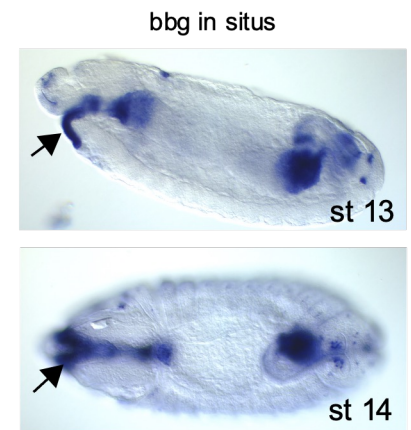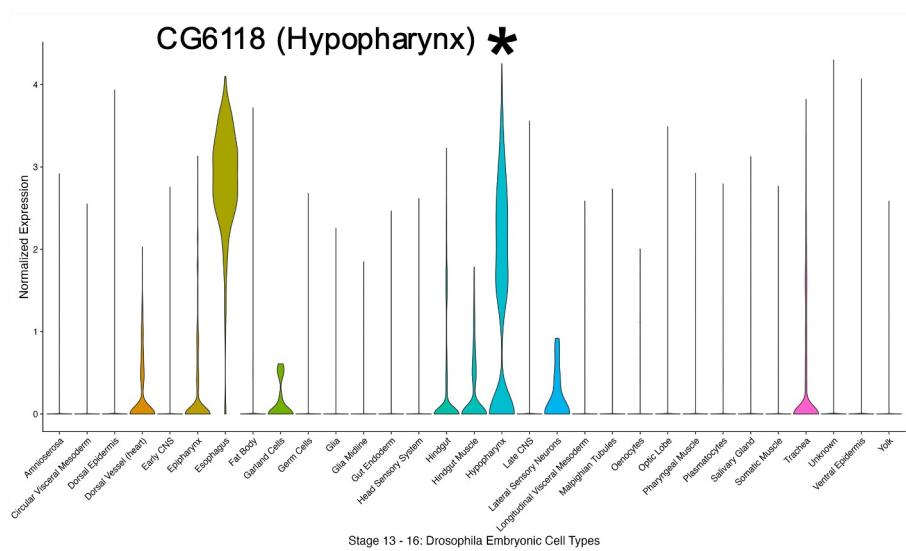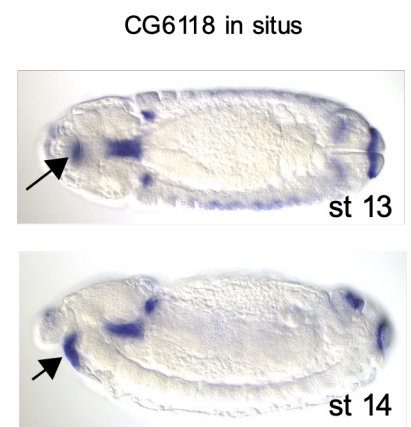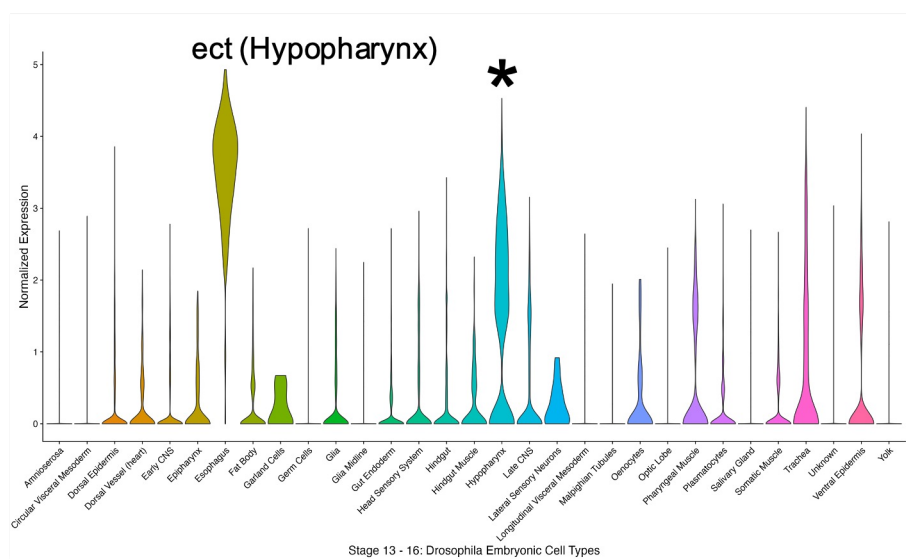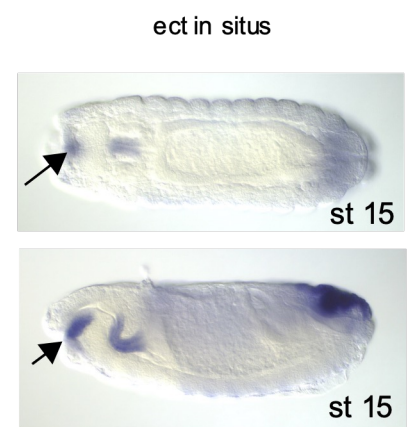

**Fig. S28.** Violin plots (on the left) and in-situ images from BDGP (on the right) of late hypopharynx marker genes: *bbg* (top), *CG6118* (middle) and *ect* (bottom).

## Late Cluster 21 Hindgut

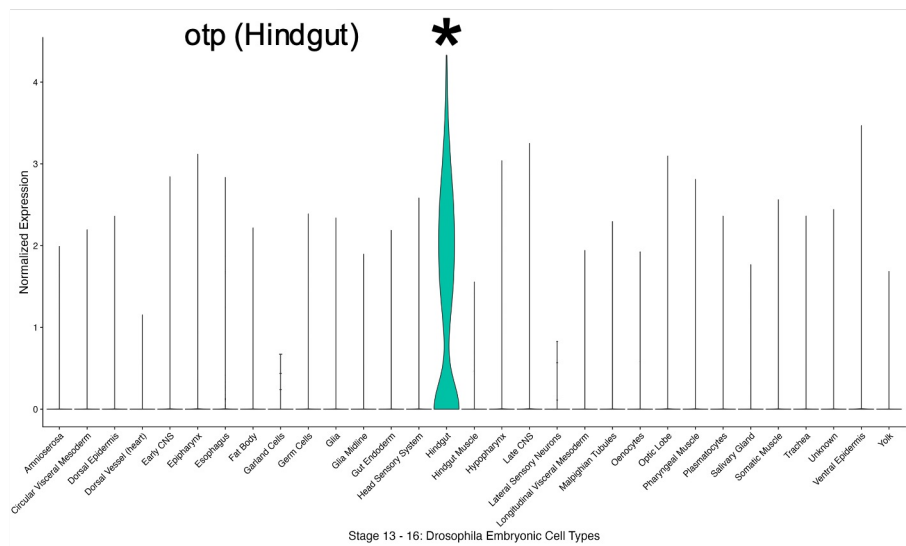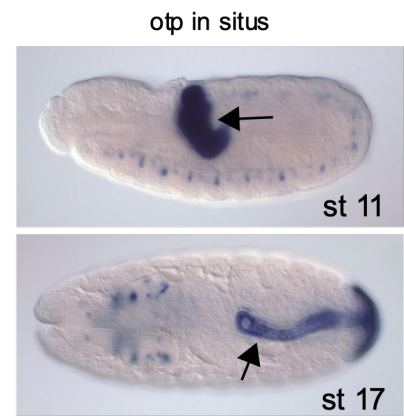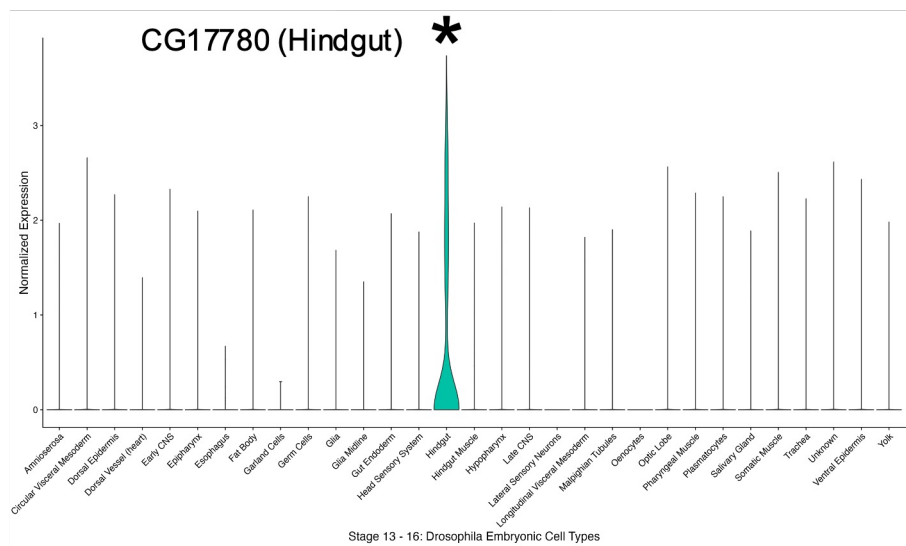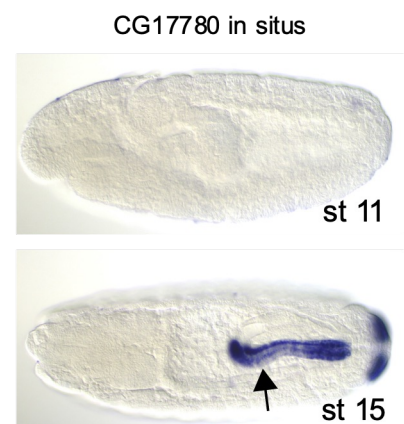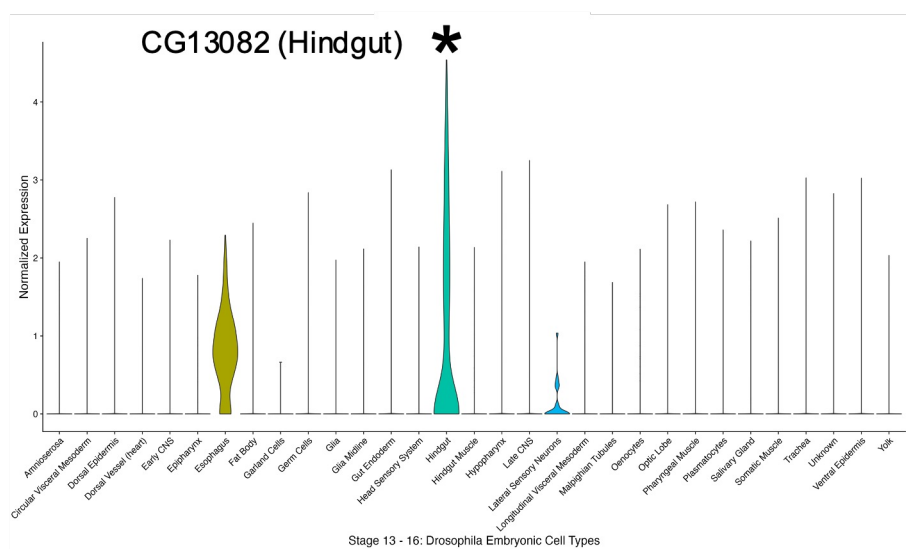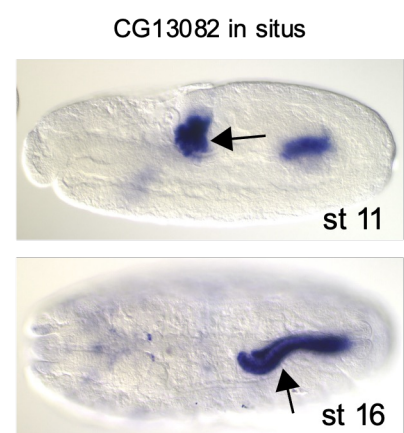

**Fig. S29.** Violin plots (on the left) and in-situ images from BDGP (on the right) of late hindgut marker genes: *otp* (top), *CG17780* (middle) and *CG13082* (bottom).



## Late Cluster 26 Hindgut Muscle

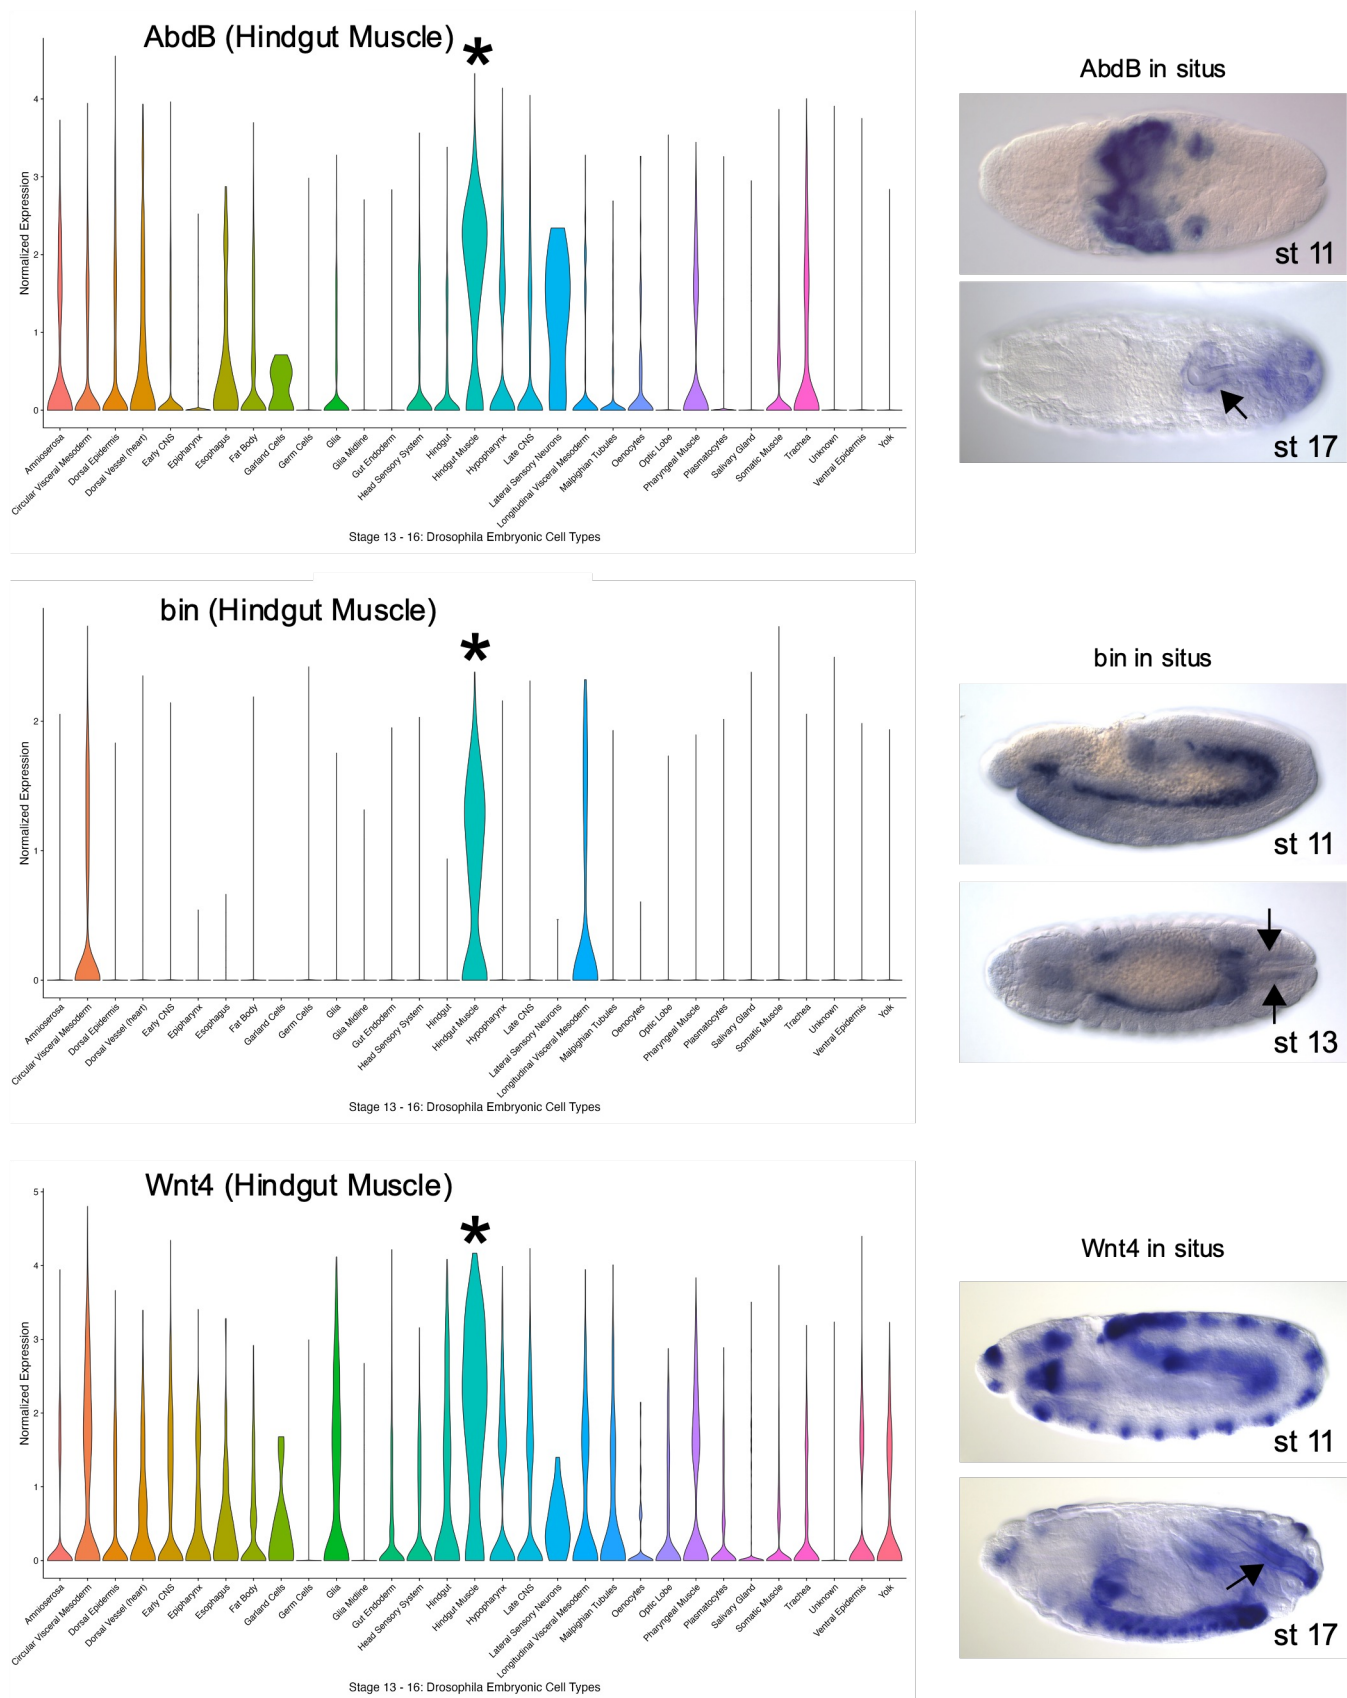

**Fig. S30.** Violin plots (on the left) and in-situ images from BDGP (on the right) of late hindgut muscle marker genes: *AbdB* (top), *bin* (middle) and *Wnt4* (bottom).



## Late Cluster 13 Pharyngeal Muscle

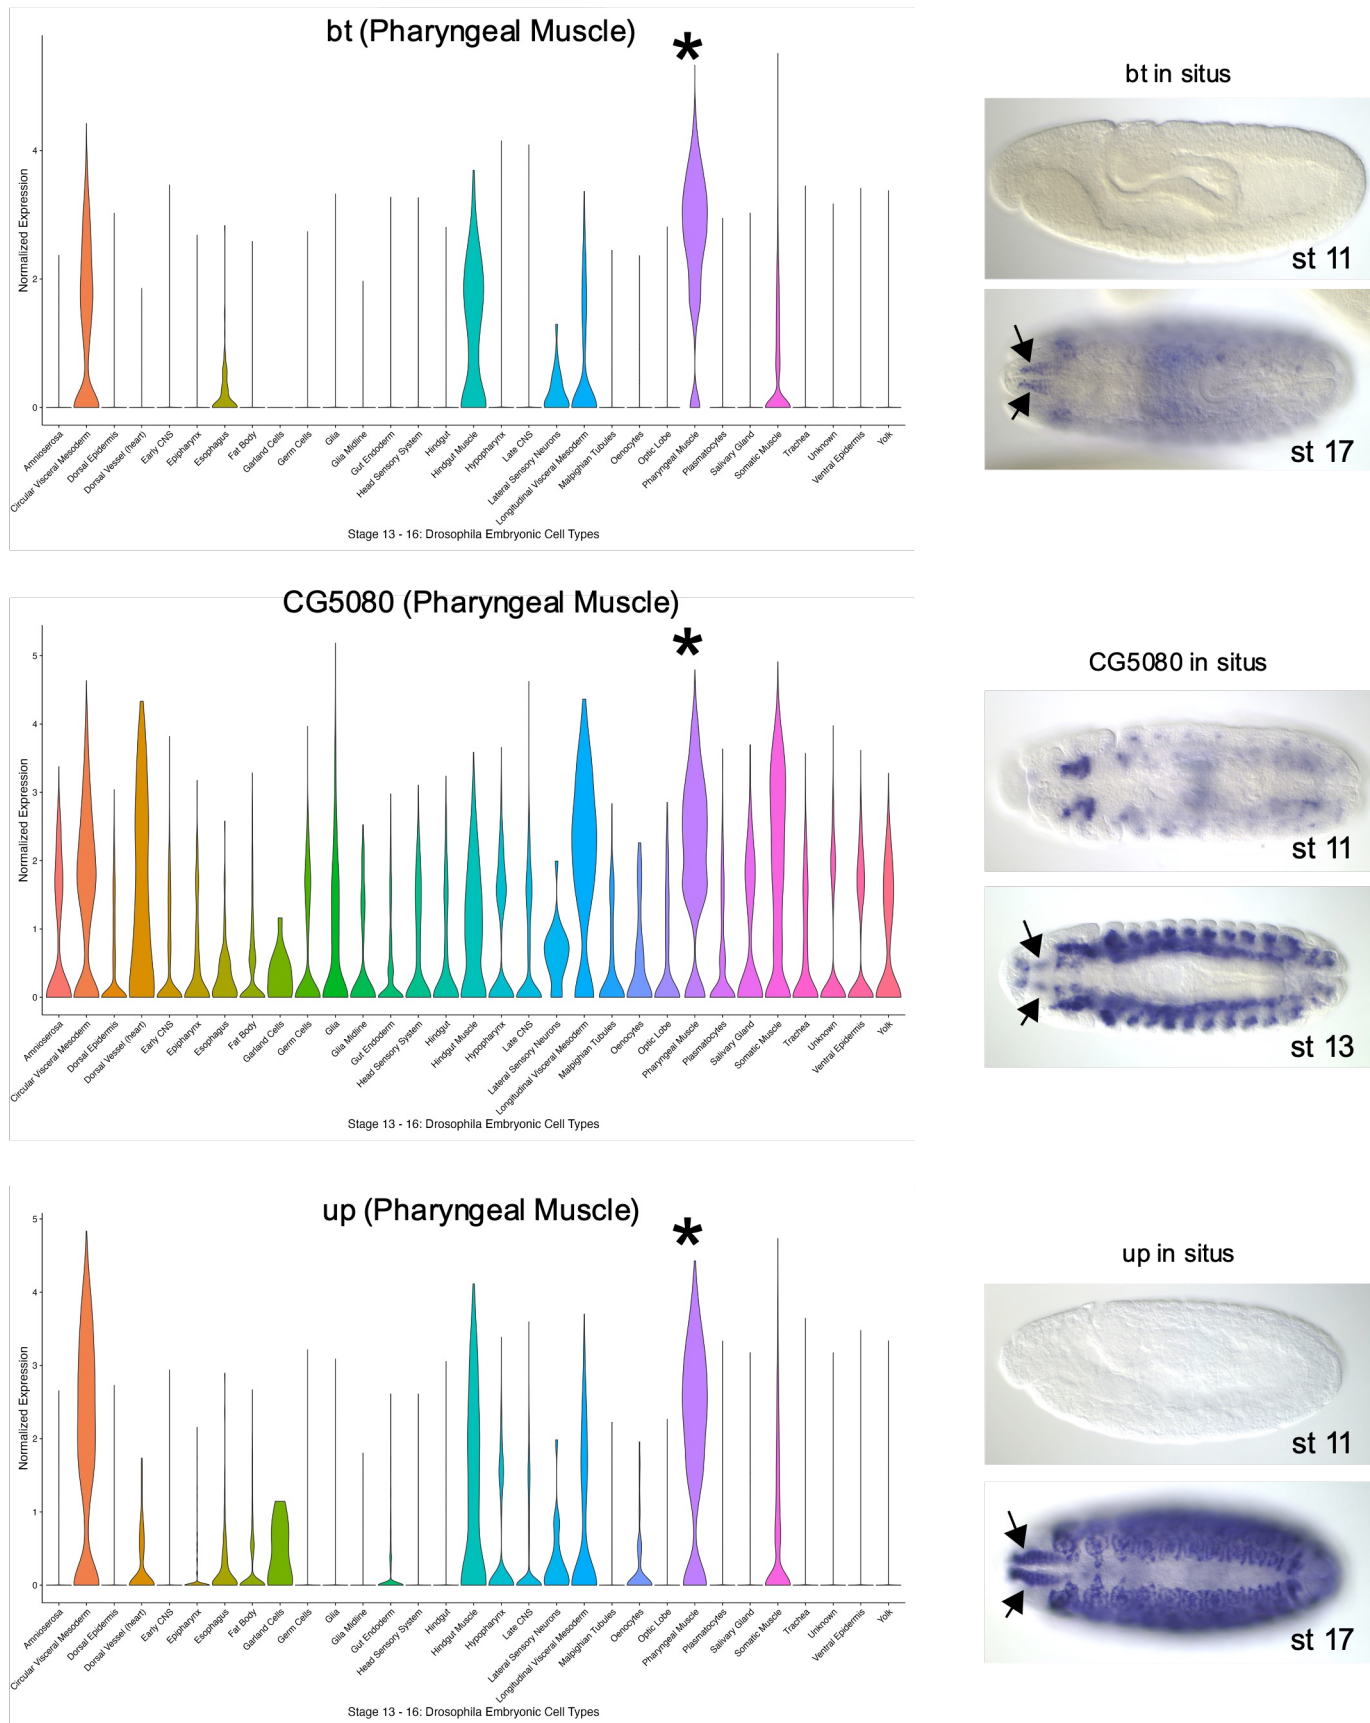

**Fig. S31.** Violin plots (on the left) and in-situ images from BDGP (on the right) of late pharyngeal muscle marker genes: *bt* (top), *CG5080* (middle) and *up* (bottom).

**A** Stage 12 Seroka et al., 2022: Apodemes

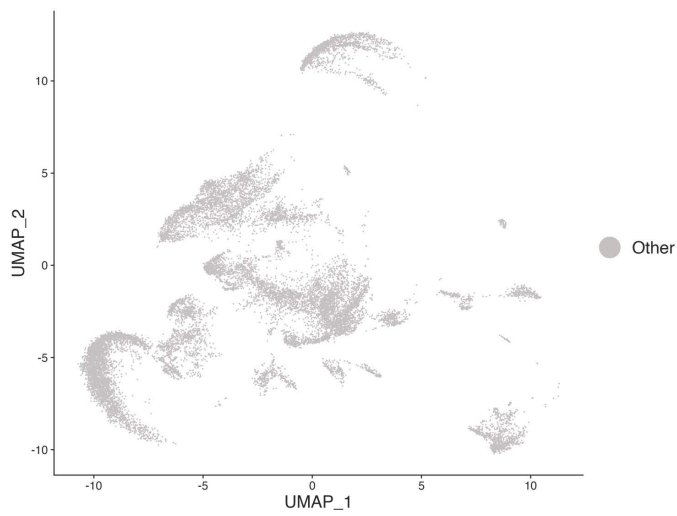

**B** Stage 12 Seroka et al., 2022: Salivary gland

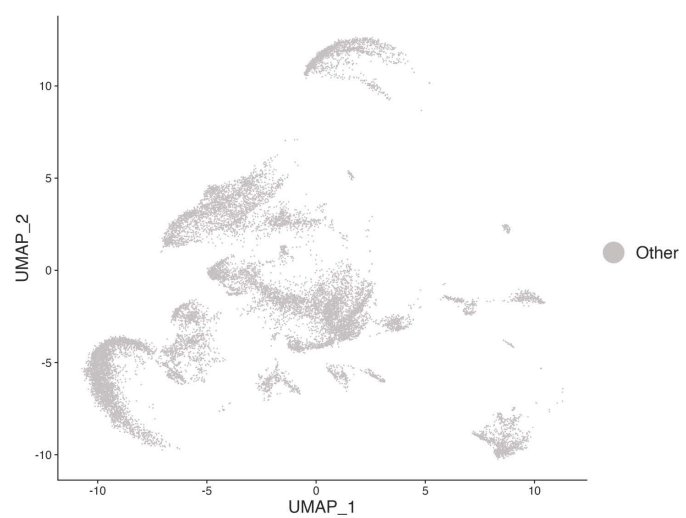

**C** Stage 12 Seroka et al., 2022: Malpighian tubules

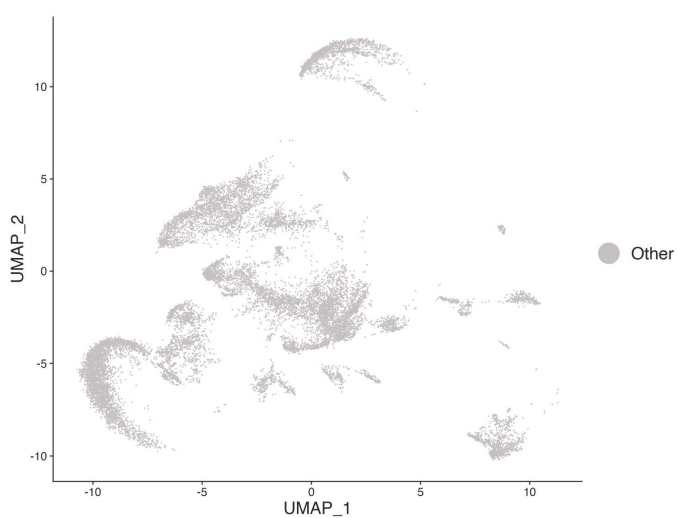

**D** Stage 12 Seroka et al., 2022: Crystal cells

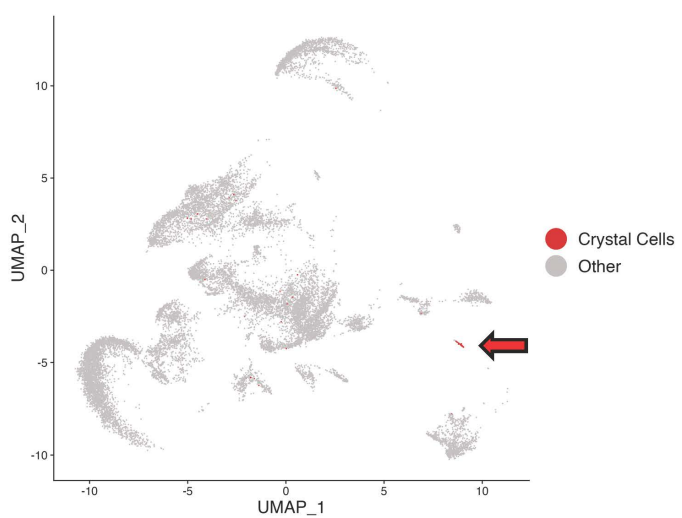

**E** Stage 10-12 Calderon et al., 2022: Apodemes

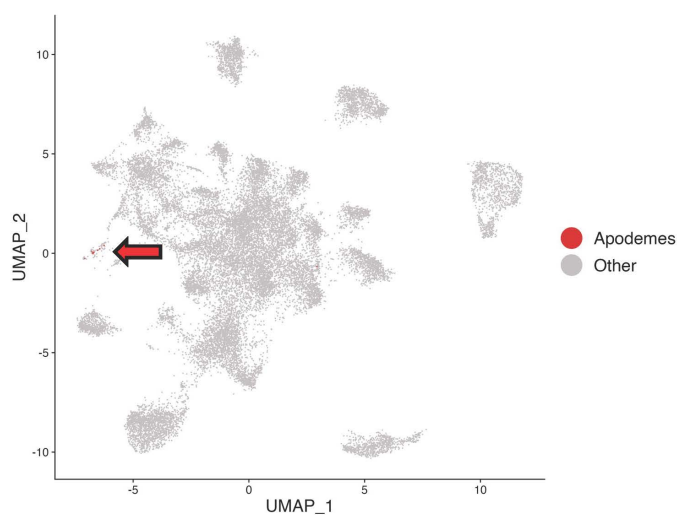

**F** Stage 10-12 Calderon et al., 2022: Malpighian tubules

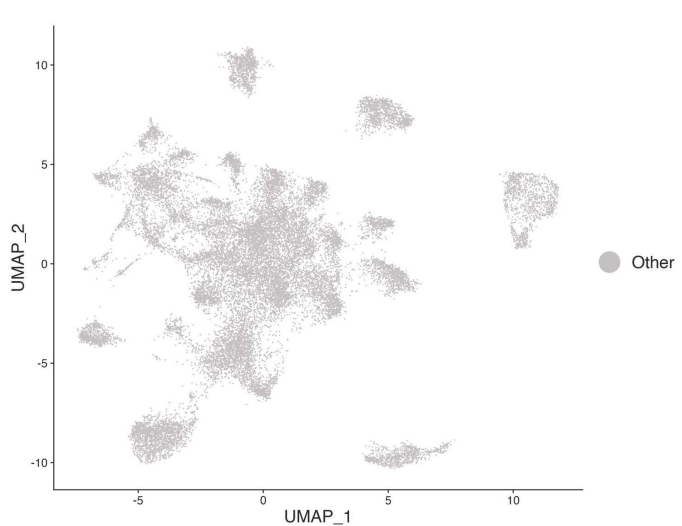

**Fig. S32.** Classification results of SingleCellNet classifier trained on our data and applied to the data from Seroka et al and Calderon et al. UMAPs showing stage 12 embryonic cells from Seroka et al that are classified as (A) apodemes, (B) SG, (C) Malpighian tubules, and (D) crystal cells. UMAPs showing stage 10-12 embryonic cells from Calderon et al that are classified as (E) apodemes and (F) Malpighian tubules.

**A** Stage 14-16 Seroka et al., 2022: Optic Lobe

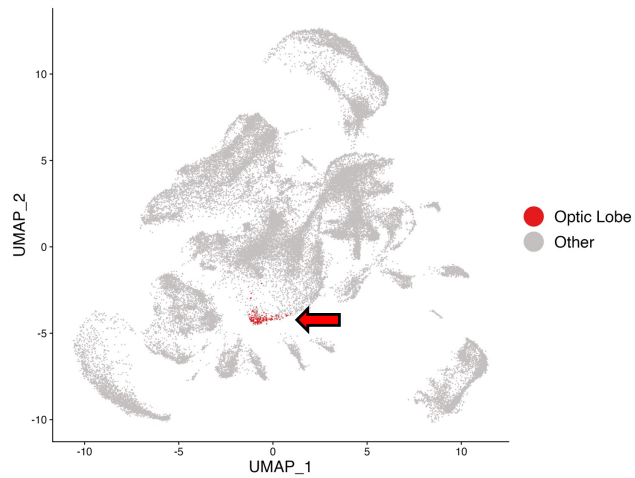

**B** Stage 14-16 Seroka et al., 2022: Salivary Gland

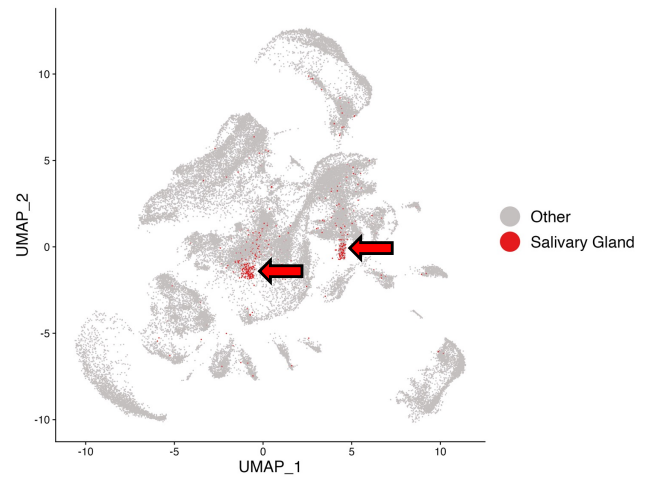

**C** Stage 14-16 Seroka et al., 2022: Dorsal Vessel

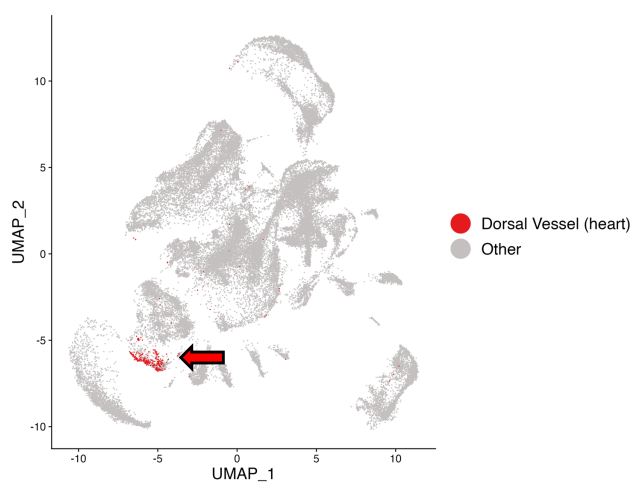

**D** Stage 14-16 Seroka et al., 2022: Malpighian Tubules

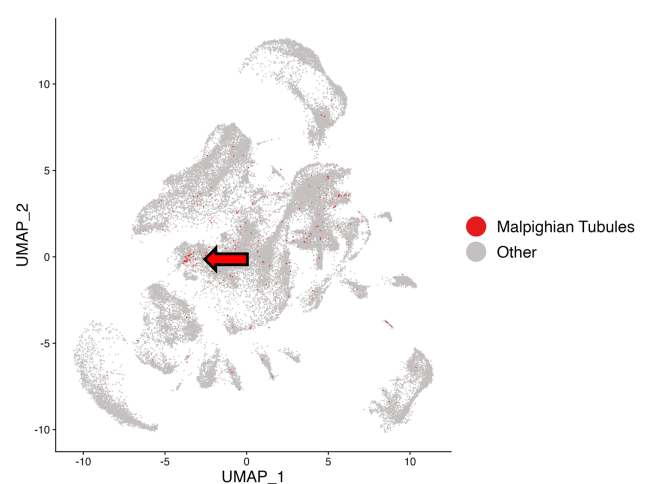

**E** Stage 14-16 Seroka et al., 2022: Oenocytes

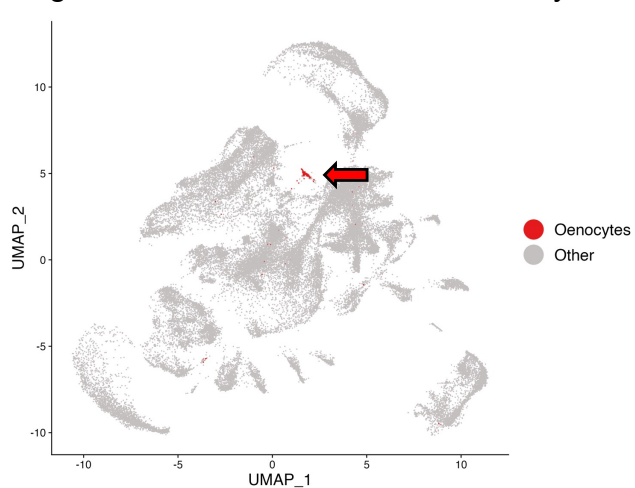

**F** Stage 14-16 Seroka et al., 2022: Garland cells

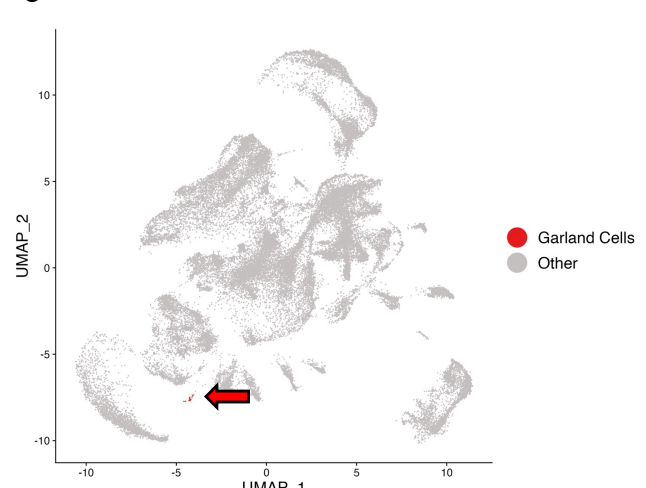

**Fig. S33.** Classification results of SingleCellNet classifier trained on our data and applied to the data from Seroka et al. UMAPs showing stage 14-16 embryonic cells from Seroka et al that are classified as (A) optic lobe, (B) salivary gland, (C) dorsal vessel, (D) Malpighian tubules, (E) oenocytes and (F) garland cells.

**A** Stage 14-16 Calderon et al., 2022: Optic Lobe

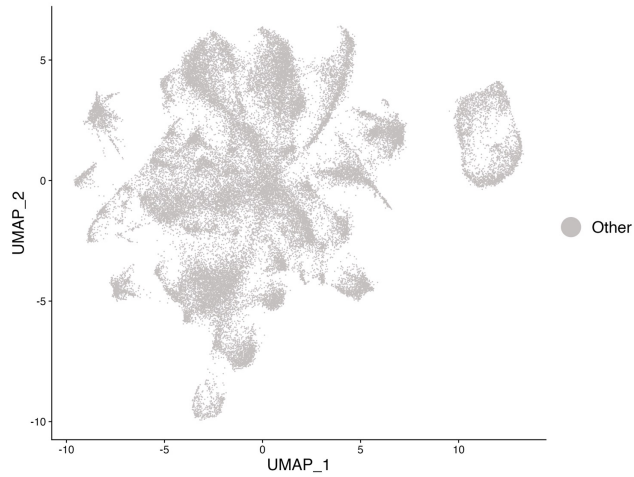

**B** Stage 14-16 Calderon et al., 2022: Dorsal Vessel

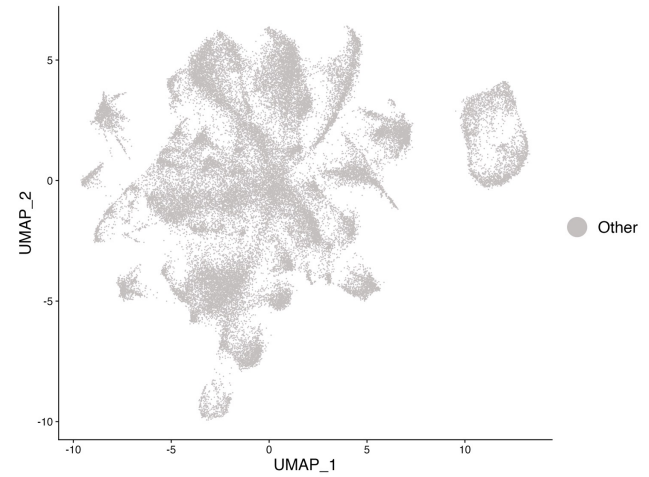

**C** Stage 14-16 Calderon et al., 2022: Malpighian Tubules

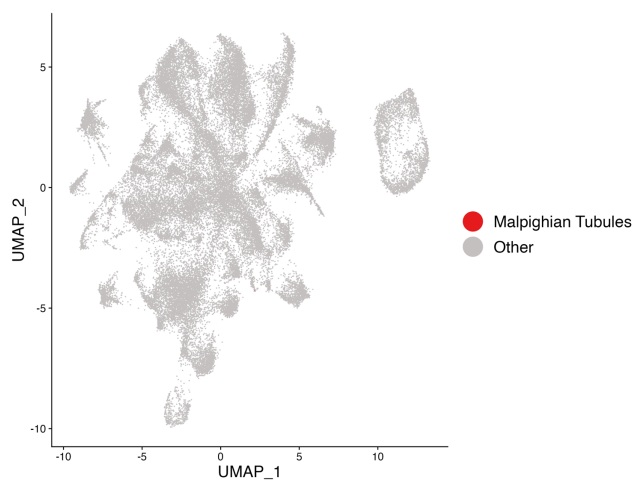

**D** Stage 14-16 Calderon et al., 2022: Oenocytes

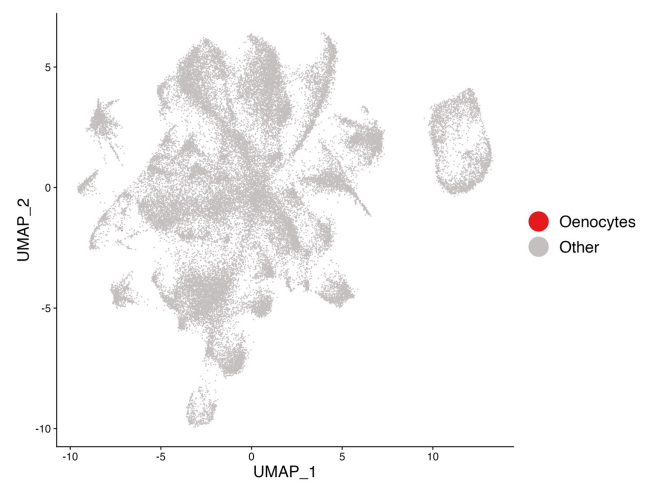

**E** Stage 14-16 Calderon et al., 2022: Garland cells

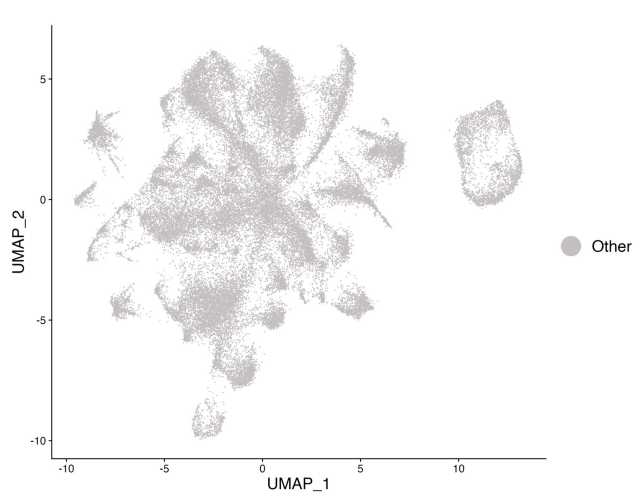

**Fig. S34.** Classification results of SingleCellNet classifier trained on our data and applied to the data from Calderon et al. UMAPs showing stage 14-16 embryonic cells from Calderon et al that are classified as (A) optic lobe, (B) dorsal vessel, (C) Malpighian tubules, (D) oenocytes and (E) garland cells.



**A Average chromosomal expression ratio of Unknown 1 GCs / major trajectory GCs**

|                              | 3L   | 3R   | 2L   | 2R   | 4    | X    |
|------------------------------|------|------|------|------|------|------|
| chromosomal expression ratio | 0.77 | 0.75 | 0.79 | 0.80 | 0.81 | 0.74 |

**B Average chromosomal expression ratio of Unknown 2 GCs / major trajectory GCs**

|                              | 3L   | 3R   | 2L   | 2R   | 4 | X    |
|------------------------------|------|------|------|------|---|------|
| chromosomal expression ratio | 0.89 | 0.84 | 0.86 | 0.88 | 1 | 0.85 |

**C Female marker genes from sexed samples (Li et al, 2021)**

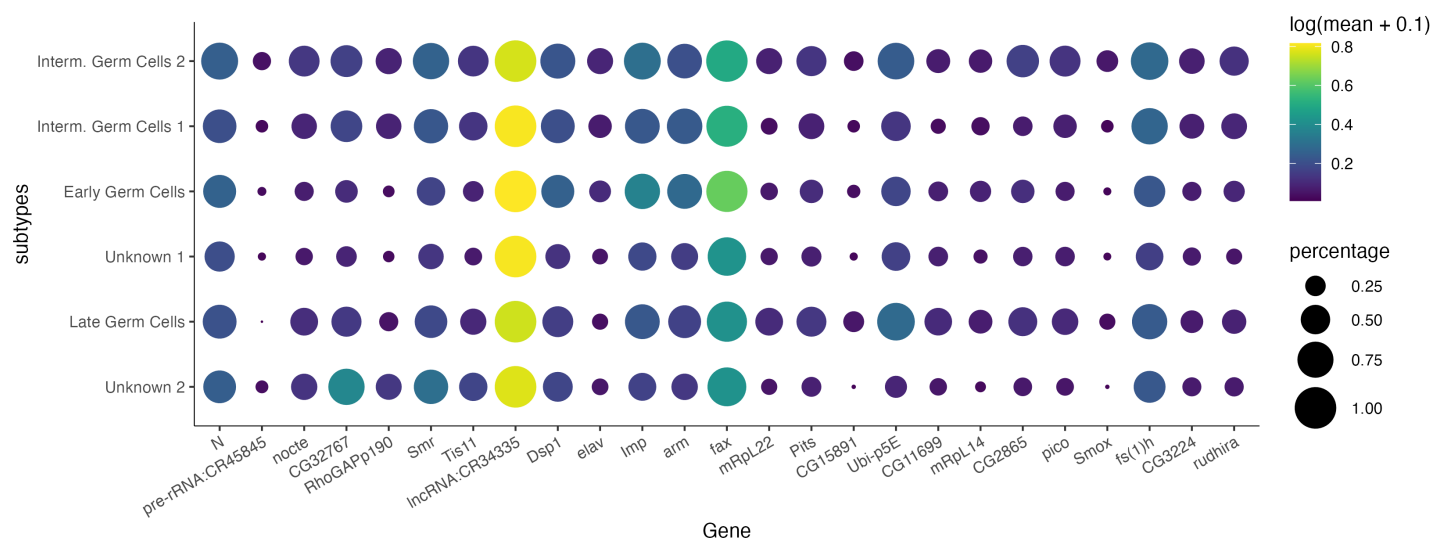

**D Male marker genes from sexed samples (Li et al, 2021)**

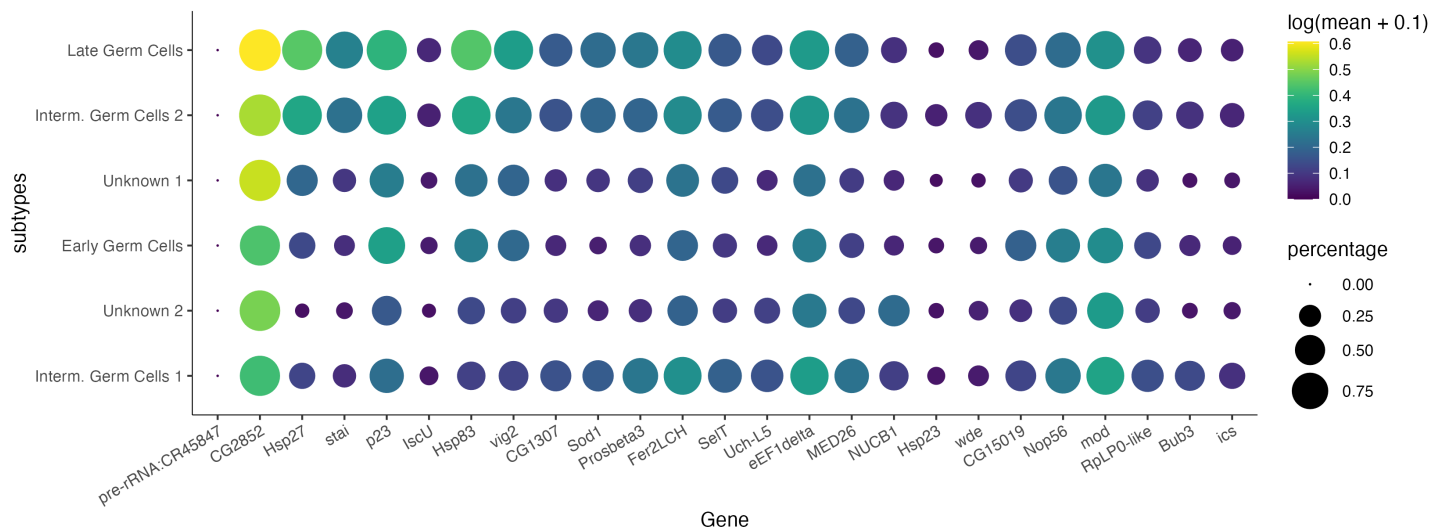

**Fig. S35.** Ratio of average chromosomal expression of (A) Unknown 1 germ cells to the main trajectory germ cells (Early Germ Cells, Intermed. Germ Cells 1, Intermed. Germ Cells 2, Late Germ Cells) and (B) Unknown 2 germ cells to the main trajectory germ cells. Dot plots of (C) female marker genes and (D) male marker genes derived from sexed samples from Li et al, 2021. The size of the dot represents the percentage of cells in the sub-population expressing the gene and the color of the dot represents the average expression of the gene in the sub-population.

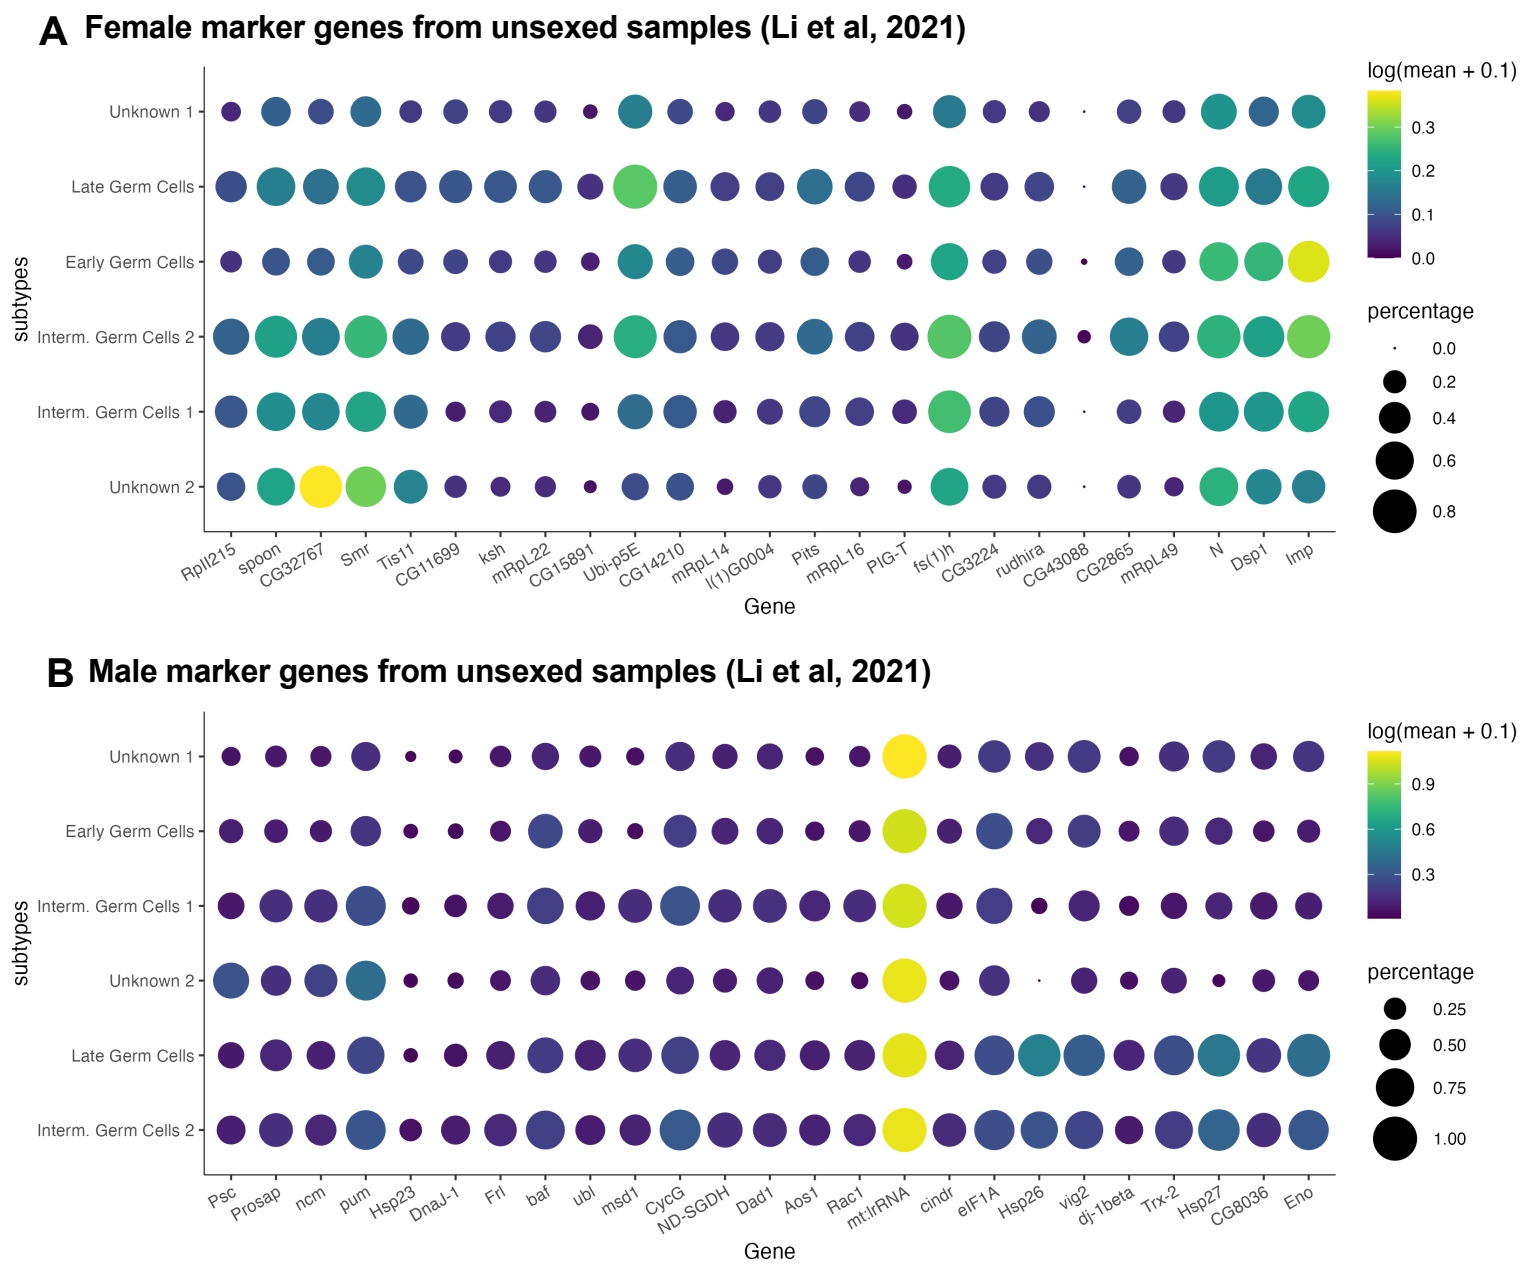

**Fig. S36.** Dot plots of (A) female marker genes and (B) male marker genes derived from unsexed samples from Li et al, 2021. The size of the dot represents the percentage of cells in the sub-population expressing the gene and the color of the dot represents the average expression of the gene in the sub-population.

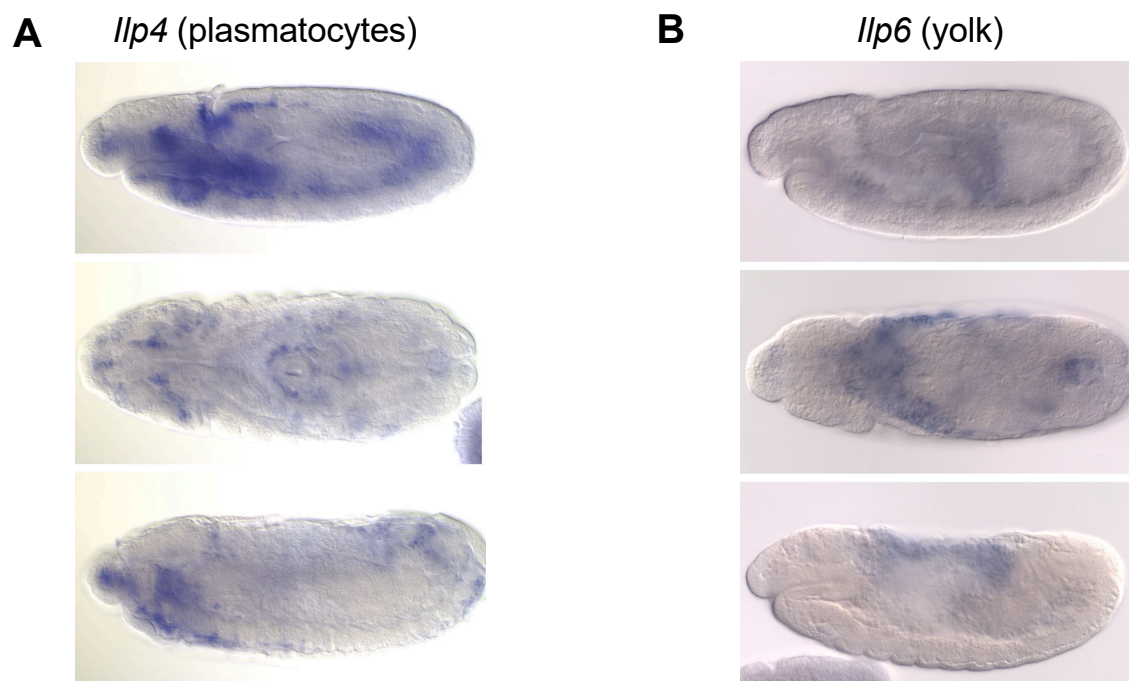

**Fig. S37.** Newly available in situ images of (A) *llp4* and (B) *llp6* show expression in plasmatocytes and presumptive yolk, respectively. Note that BDGP calls *llp6* expression as amnioserosa, not yolk.

**Table S1.** Experimental details of embryo collections.

Available for download at  
<https://journals.biologists.com/dev/article-lookup/doi/10.1242/dev.202097#supplementary-data>

**Table S2.** Differentially expressed genes for individual clusters relative to rest of the embryonic cells in stage 10-12 and stage 13-16 embryos.

Available for download at  
<https://journals.biologists.com/dev/article-lookup/doi/10.1242/dev.202097#supplementary-data>

**Table S3.** Selected markers genes for individual clusters in stage 10-12 and stage 13-16 embryos that are cross-referenced with BDGP for cell type identification.

Available for download at  
<https://journals.biologists.com/dev/article-lookup/doi/10.1242/dev.202097#supplementary-data>

**Table S4.** GSEA results for SG, trachea and germ cells relative to rest of the embryonic cells in stage 10-12 and stage 13-16 embryos.

Available for download at  
<https://journals.biologists.com/dev/article-lookup/doi/10.1242/dev.202097#supplementary-data>

**Table S5.** Differentially expressed genes for SG sub-populations (early and late SG cells) relative to all other SG cells.

Available for download at  
<https://journals.biologists.com/dev/article-lookup/doi/10.1242/dev.202097#supplementary-data>

**Table S6.** GSEA results for different SG sub-populations (early and late SG cells) relative to all other SG cells.

Available for download at  
<https://journals.biologists.com/dev/article-lookup/doi/10.1242/dev.202097#supplementary-data>



**Table S7.** Differentially expressed genes for trachea sub-populations (early tracheal cells, intermediate tracheal cells, late tracheal cells, and tracheal tip cells) relative to all other tracheal cells.

Available for download at

<https://journals.biologists.com/dev/article-lookup/doi/10.1242/dev.202097#supplementary-data>

**Table S8.** GSEA results for different trachea sub-populations (early tracheal cells, intermediate tracheal cells, late tracheal cells, and tracheal tip cells) relative to all other tracheal cells.

Available for download at

<https://journals.biologists.com/dev/article-lookup/doi/10.1242/dev.202097#supplementary-data>

**Table S9.** Differentially expressed genes for germ cells sub-populations (early germ cells, intermediate germ cells 1, intermediate germ cells 2, late germ cells, unknown 1 and unknown 2) relative to all other germ cells.

Available for download at

<https://journals.biologists.com/dev/article-lookup/doi/10.1242/dev.202097#supplementary-data>

**Table S10.** GSEA results for germ cell sub-populations (early germ cells, intermediate germ cells 1, intermediate germ cells 2, late germ cells, unknown 1 and unknown 2) relative to all other germ cells.

Available for download at

<https://journals.biologists.com/dev/article-lookup/doi/10.1242/dev.202097#supplementary-data>

**Table S11.** The average expression and cell percent expression of all matrisome genes shown in Figure 6A, S10A, S12 for different cell types in stage 10-12 embryos.

Available for download at

<https://journals.biologists.com/dev/article-lookup/doi/10.1242/dev.202097#supplementary-data>

**Table S12.** The average expression and cell percent expression of all matrisome genes shown in Figure 6B, S10B, S13 for different cell types in stage 13-16 embryos.

Available for download at

<https://journals.biologists.com/dev/article-lookup/doi/10.1242/dev.202097#supplementary-data>

**Table S13.** Cell type harmonization for Seroka et al, Calderon et al and this study.

Available for download at

<https://journals.biologists.com/dev/article-lookup/doi/10.1242/dev.202097#supplementary-data>
